# Supplementary material
Source: PubMed Central journal article supplement (PMC5063045)
Supplement: NIHMS806641-supplement-Supp_info.pdf [file NIHMS806641-supplement-Supp_info.pdf]

1 **SUPPLEMENTAL INFORMATION (SI)**

2 **Suppression of Deletion Mutation in the Gene Encoding Essential PBP2b Reveals**  
3 **a New Lytic Transglycosylase Involved in Peripheral Peptidoglycan Synthesis in**  
4 ***Streptococcus pneumoniae* D39**

5  
6 Ho-Ching Tiffany Tsui<sup>‡1</sup>, Jiaqi J. Zheng<sup>‡1</sup>, Ariel N. Magallon<sup>1</sup>, John D. Ryan<sup>1</sup>, Rachel  
7 Yunck<sup>2</sup>, Britta E. Rued<sup>1</sup>, Thomas G. Bernhardt<sup>2</sup> and Malcolm E. Winkler<sup>1\*</sup>

8  
9 <sup>1</sup>Department of Biology, Indiana University Bloomington, Bloomington, IN 47405 and

10 <sup>2</sup>Department of Microbiology and Immunology, Harvard Medical School, Boston, MA  
11 02115, USA

12  
13 <sup>‡</sup>Contributed equally to this work

14 <sup>\*</sup>Corresponding author

15 **SUPPLEMENTAL EXPERIMENTAL PROCEDURES**

16 **SUPPLEMENTAL TABLE S1.** Bacterial strains used in this study

17 **SUPPLEMENTAL TABLE S2.** Oligonucleotide primers used in this study

18 **SUPPLEMENTAL TABLE S3.** Structural similarity of extracellular domain of MltG<sub>Spn</sub> to  
19 known protein structures

20  
21 **SUPPLEMENTAL TABLE S4.** Genes encoding proteins with known or putative PG lytic  
22 domains and WalRK-regulated genes in *S. pneumoniae* serotype 2 strain D39,  
23 observed hydrolase activities in zymogram assays and phenotypes of deletion mutants  
24 in a  $\Delta pbp1a \Delta mltG$  background.

25  
26 **SUPPLEMENTAL FIGURE LEGENDS:** Fig. S1-S15

27 **REFERENCES TO SUPPLEMENTAL INFORMATION**

## SUPPLEMENTAL EXPERIMENTAL PROCEDURES

### **Reconstruction of $\Delta pbp2b$ strains with original *mltG* suppressor alleles (Fig. S4)**

Genotypes of strains in these constructions are listed in Table S1 and primers used in constructions are compiled in Table S2. Two approaches were used to reconstruct  $\Delta pbp2b$  strains with *mltG* suppressor alleles (see Fig. S4). The first approach used intermediate strains with insertions of a  $P_c$ -[*kan-rpsL*<sup>+</sup>] cassette either upstream or downstream *mltG* in a *pbp1a*<sup>+</sup> genetic background. This approach was only successful in reconstructing  $\Delta pbp2b$  *sup3* (IU9783,  $\Delta pbp2b$  *mltG*(Y488D)). To obtain IU9783, an intermediate strain IU8986 (D39  $\Delta cps$  *rpsL1* *mltG*<sup>+</sup>- $P_c$ -[*kan-rpsL*<sup>+</sup>]) with an insertion of  $P_c$ -[*kan-rpsL*<sup>+</sup>] cassette immediately after *mltG* was constructed. An *mltG*(Y488D) amplicon was obtained using IU7567 as a template and primers P1348 and P1349 and transformed into IU8986 to obtain IU9760, which was sequenced to confirm the Y488D change, and no other mutation in *mltG* or *pbp1a*. IU9760 was transformed with  $\Delta pbp2b$ <*aad9* from IU7397 to obtain IU9783 (D39  $\Delta cps$  *rpsL1* *mltG*(Y488D)  $\Delta pbp2b$ <*aad9*) (Fig. S4).

We attempted a similar strategy to reconstruct the other suppressor strains without success. The transformation of a *mltG*( $\Delta 5bp$ ) amplicon into IU8986 (*mltG*<sup>+</sup>- $P_c$ -[*kan-rpsL*<sup>+</sup>]) and the transformation of *mltG*( $\Delta 488bp$ ) or *mltG*( $\Omega 45bp$ )<sup>2</sup> amplicons into IU8980 ( $P_c$ -[*kan-rpsL*<sup>+</sup>]-*mltG*<sup>+</sup>) yielded only strains with the wild-type *mltG* sequence. One isolate was found to contain the *mltG*( $\Delta 488bp$ ) mutation, but it was found to also contain a frameshift mutation in *pbp1a*.

The second approach (Fig. S4) was to transfer the *mltG* [ $\Delta 5bp$ ,  $\Delta 488bp$  or ( $\Omega 45bp$ )<sup>2</sup>] mutations into a stabilizing  $\Delta pbp1a$  genetic background as the first step (see *Results*).

52 Amplicons were synthesized from the original suppressor strains as templates using  
53 primers P1348 and P1349 and transformed into strain IU7325 ( $\Delta cps rpsL1 \Delta pbp1a$   
54  $\Delta mltG::P_c-[kan-rpsL^+]$ ). The resulting strains were transformed with the  $\Delta pbp2b \langle aad9$   
55 amplicon. The  $\Delta pbp1a$  mutations in strains IU8565, IU8567 and IU8569 were repaired  
56 by transformation first with a  $\Delta pbp1a::P_c-[kan-rpsL^+]$  amplicon, followed by  
57 transformation with a  $pbp1a^+$  amplicon. Strains IU9777, IU9905 and IU9907 were  
58 sequenced to confirm the correct *mltG* mutation and no initial mutation in *pbp1a*.

59

### 60 **Reconstruction of *pbp1a* alleles in a clean genetic background (Fig. 3)**

61 PCR amplicons containing *pbp1a* alleles from original  $\Delta mltG$  suppressor strains  
62 IU7258 ( $\Delta mltG pbp1a$  (G494E)), IU7260 ( $\Delta mltG pbp1a$  (G deletion at Gly451)), IU7286  
63 ( $\Delta mltG pbp1a$  (S89F)), IU7287 ( $\Delta mltG pbp1a$  (A deletion at Lys160)), IU7288 ( $\Delta mltG$   
64  $pbp1a$  (T insertion at Phe33)) were prepared from strain lysates and primers P234 and  
65 P235. Amplicons were transformed into intermediate strain IU6726 (D39  $\Delta cps rpsL1$   
66  $\Delta pbp1a::P_c-[kan-rpsL^+]$ ) as described above (see Fig. S4). The resulting strains were  
67 designated IU7837 (*pbp1a* (G494E)), IU7839 (*pbp1a* (G deletion at Gly451)), IU7840  
68 (*pbp1a* (S89F)), IU7843 (*pbp1a* (A deletion at Lys160)), and IU7845 (*pbp1a* (T insertion  
69 at Phe33)). *pbp1a* alleles in reconstructed strains were confirmed by DNA sequencing.  
70 A markerless  $\Delta pbp1a$  allele in strain IU6741 was constructed by transforming a  $\Delta pbp1a$   
71 fusion amplicon containing 60 bp (20 codons) from the N-terminus and 60 bp (20  
72 codons) from the C-terminus of *pbp1a* into strain IU6726 (see top, Fig. S4). The short  
73 regions at the beginning and end of *pbp1a* were included in the  $\Delta pbp1a$  allele to  
74 maintain possible translational coupling of closely spaced pneumococcal genes.

75 **Construction of zinc-dependent *MltG* merodiploid strain IU9102 (Fig. 3 and 6)**

76 The  $\Delta bgaA::tet\text{-}P_{Zn}\text{-RBS}_{m\text{lt}G}\text{-}m\text{lt}G$  fusion amplicon was obtained by fusion PCR of a  
77 5' PCR fragment containing  $bgaA'::tet\text{-}P_{Zn}$  ( $bgaA'::tet\text{-}P_{czcD}$  DNA template from pJWV25  
78 (Eberhardt *et al.*, 2009)), a middle fragment containing  $\text{RBS}_{m\text{lt}G}\text{-}m\text{lt}G$  (24bp upstream  
79 and ORF sequences of *m\text{lt}G*), and 3' fragment of flanking *bgaA'* sequence. The fusion  
80 amplicon was transformed into IU1945 to obtain strain IU8872 (D39  $\Delta cps \Delta bgaA::tet\text{-}$   
81  $P_{Zn}\text{-RBS}_{m\text{lt}G}\text{-}m\text{lt}G$ ). A  $\Delta m\text{lt}G::P_c\text{-}aad9$  fusion amplicon was transformed into IU8872 to  
82 obtain zinc-dependent, merodiploid strain IU9102 (D39  $\Delta cps \Delta m\text{lt}G::P_c\text{-}$   
83  $aad9//\Delta bgaA::tet\text{-}P_{Zn}\text{-RBS}_{m\text{lt}G}\text{-}m\text{lt}G$ ). IU9102 was maintained in media containing 0.2  
84 mM  $\text{ZnCl}_2$  and 0.02 mM  $\text{MnSO}_4$  during all steps in the transformation procedure, single  
85 colony isolation, and growth for storage.  $\text{MnSO}_4$  was added at a concentration of 0.1X  
86 of  $\text{ZnCl}_2$  in all media to minimize  $\text{Zn}^{+2}$  toxicity (Jacobsen *et al.*, 2011). Growth and cell  
87 morphology of wild type strain IU1945 in BHI media containing 0.2 mM  $\text{ZnCl}_2$  and 0.02  
88 mM  $\text{MnSO}_4$  is similar to growth in BHI media without additional  $\text{ZnCl}_2$  and  $\text{MnSO}_4$ .

89  
90 **Construction of markerless *ftsZ-L2-mKate2*, *gfp-L1-m\text{lt}G*, and double *ftsZ-L2-*  
91 *mKate2 gfp-L1-m\text{lt}G* strains (Fig. 9)**

92 *mKate2* is a far-red monomeric fluorescent protein, whose codons have been  
93 optimized for expression in *S. pneumoniae* (Beilharz *et al.*, 2015). Because of its  
94 relative stability, *mKate2* is preferred over *mCherry* for localization studies. To construct  
95 a markerless carboxyl fusion of *ftsZ* to *mKate2*, intermediate strain IU7614 ( $ftsZ^+\text{-}P_c\text{-}$   
96 [*kan-rpsL*<sup>+</sup>]) was constructed by insertion of the  $P_c\text{-}[kan\text{-}rpsL^+]$  cassette after the *ftsZ*  
97 stop codon. The  $P_c\text{-}[kan\text{-}rpsL^+]$  cassette was followed by a duplicated 60 bp of the 3'-

98 end of *ftsZ* and the downstream gene *ylmE*. An *ftsZ*-L<sub>2</sub>-*mKate2* fusion amplicon with  
99 *ftsZ* replaced by *ftsZ*-L<sub>2</sub>-*mKate2*, followed by 17 bp of the 3'-end of *ftsZ* was constructed  
100 and transformed into strain IU7614 to obtain IU9148 (*ftsZ*-L<sub>2</sub>-*mKate2*). The L<sub>2</sub> linker  
101 sequence KLDIEFLQ was used for the C-terminal fusion as described in (Fleurie *et al.*,  
102 2014).

103 To construct a markerless N-terminal fusion of *gfp* to *mltG*, intermediate strain  
104 IU8980 (P<sub>c</sub>[*kan-rpsL*<sup>+</sup>]-*mltG*<sup>+</sup>) was constructed with the P<sub>c</sub>[*kan-rpsL*<sup>+</sup>] cassette placed  
105 80 bp upstream of *mltG*. A *gfp*-L<sub>1</sub>-*mltG* fusion amplicon with *mltG* replaced by *gfp*-L<sub>1</sub>-  
106 *mltG* was constructed and transformed into IU8980 to obtain IU10228 (*gfp*-L<sub>1</sub>-*mltG*).  
107 The original *mltG* start codon TTG is replaced with ATG of *gfp*. The L<sub>1</sub> linker sequence  
108 LEGSG was used for the N-terminal fusion as described in (Fleurie *et al.*, 2014). The  
109 DNA template for *gfp* is pUC57-*gfp*(*Sp*) (Martin *et al.*, 2010), which was codon  
110 optimized for *S. pneumoniae* and has an aa substitution (A206K) that prevents GFP  
111 dimerization.

112 To construct double *ftsZ*-L<sub>2</sub>-*mKate2* *gfp*-L<sub>1</sub>-*mltG* strain IU10353, IU10228 (*gfp*-L<sub>1</sub>-  
113 *mltG*) was transformed with the *ftsZ*<sup>+</sup>-P<sub>c</sub>-[*kan-rpsL*<sup>+</sup>] amplicon from IU7614 to obtain  
114 IU10318 (*gfp*-L<sub>1</sub>-*mltG* *ftsZ*<sup>+</sup>-P<sub>c</sub>-[*kan-rpsL*<sup>+</sup>]). IU10318 was transformed with a *ftsZ*-L<sub>2</sub>-  
115 *mKate2* amplicon from IU9148 to obtain final strain IU10353.

### 116 117 **Construction of *mltG*( $\Delta$ DUF\_1346) strains**

118 Initially we did not know whether the DUF\_1346 domain was essential for MltG  
119 function. Since  $\Delta$ *mltG*  $\Delta$ *pbp1a* strains are viable, whereas  $\Delta$ *mltG* *pbp1a*<sup>+</sup> strains are not,  
120 a *mltG*( $\Delta$ DUF\_1346) mutation was first constructed in strain IU6741 (D39  $\Delta$ *cps* *rpsL1*

121  $\Delta pbp1a$ ). IU6741 was transformed with  $\Delta mltG::P_c-[kan-rpsL^+]$  from strain K637,  
122 producing strain IU7325 (D39  $\Delta cps$   $rpsL1$   $\Delta pbp1a$   $\Delta mltG::P_c-[kan-rpsL^+]$ ). A  
123  $mltG(\Delta DUF\_1346)$  fusion amplicon was then constructed by fusion PCR and  
124 transformed into IU7325. The resulting strain was designated as IU8910 (D39  $\Delta cps$   
125  $rpsL1$   $\Delta pbp1a$   $mltG(\Delta DUF\_1346)$ ). To evaluate whether the  $mltG(\Delta DUF\_1346)$  allele is  
126 functional in IU8910, we attempted to transform a  $\Delta pbp2b$  amplicon (Table 2) into  
127 IU8910. No colonies were recovered, indicating that  $MltG(\Delta DUF\_1346)$  is functional in  
128 IU8910.

129 We synthesized an  $mltG(\Delta DUF\_1346)$  amplicon from strain IU8910 and transformed  
130 the amplicon into strain IU8980 ( $P_c-[kan-rpsL^+]-mltG^+$ ). Hundreds of well-formed  
131 streptomycin resistant colonies appeared after 20 hours of incubation. Two isolates  
132 (strain IU9025 and IU9026) were stored from independent transformations, and DNA  
133 sequencing confirmed that both strains contain the  $mltG(\Delta DUF\_1346)$  allele. DNA  
134 sequencing also confirmed that  $pbp1a^+$  of strain IU9025 had not accumulated any  
135 mutations.

### 136

### 137 **Conditions comparing growth of $mltG^+$ and $mltG(\Delta DUF\_1346)$ strains (Fig. S9)**

138 Growth of  $mltG^+$  parent strain IU1824 and  $mltG(\Delta DUF\_1346)$  mutant IU9025 was  
139 compared in media containing high salt,  $\beta$ -lactam antibiotic penicillin G, and at low pH.  
140 To test growth in high salt conditions, IU1824 and IU9025 were grown in BHI broth  
141 without additional NaCl (0.08 M NaCl in BHI formula), or in BHI broth with additional  
142 NaCl to a final concentration of 0.3 M. Strains were grown overnight in BHI broth, and  
143 diluted to  $OD_{620} \approx 0.003$  in BHI broth with or without additional NaCl. To test the growth

144 of IU1824 and IU9025 in the presence penicillin G, strains were grown overnight in BHI  
145 broth, and diluted to  $OD_{620} \approx 0.003$  in BHI broth for culture growth. At  $OD_{620} \approx 0.1$ ,  
146 penicillin G sodium salt (Sigma PEN-NA) was added to the cultures to final  
147 concentrations of 0, 0.004 (0.5x MIC, Kocaoglu *et al.*, 2015), and 0.006  $\mu\text{g/ml}$ . This  
148 experiment was repeated once with addition of penicillin G concentrations of 0, 0.002,  
149 0.004 and 0.008  $\mu\text{g/ml}$ . To test the growth of IU1824 and IU9025 at low pH condition,  
150 strains were grown overnight in BHI broth (pH 7.2), and diluted to  $OD_{620} \approx 0.003$  in BHI  
151 broth for culture growth. At  $OD_{620} \approx 0.1$ , 100 or 150  $\mu\text{L}$  of 1 M HCl were added to the 5  
152 mL cultures to decrease the pH to 5.8 or 5.0. This growth experiment was repeated  
153 once. To test the effect of temperature on growth of *mltG*<sup>+</sup> and *mltG*( $\Delta\text{DUF}_1346$ )  
154 strains, ice from frozen cultures of both strains was streaked onto two TSAII-BA plates.  
155 One plate was incubated at 37°C in an atmosphere of 5% CO<sub>2</sub> overnight, and the other  
156 was incubated at 42°C in an atmosphere of 5% CO<sub>2</sub> overnight. The size and  
157 morphologies of the colonies of the two strains were compared.

### 158

### 159 **Western blotting (Fig. S2)**

160 Strains were grown exponentially in BHI broth to  $OD_{620} \approx 0.15$ . Lysates were  
161 prepared as described previously (Wayne *et al.*, 2012) and separated using 10 % or 4-  
162 15% mini-protean TGX pre-cast gels (Bio-Rad). FLAG-, HA-, and Myc-tagged proteins  
163 were detected by Western blotting as described previously (Tsui *et al.*, 2014).  
164 Chemiluminescent signal in protein bands was quantitated by using an IVIS imaging  
165 system as described in (Wayne *et al.*, 2010).

167 ***DNA library construction, Illumina MiSeq DNA sequencing, and bioinformatic***  
168 ***analyses (Table 1)***

169 One  $\mu\text{g}$  of genomic DNA of each sample was diluted to 130  $\mu\text{L}$  with TE and sheared  
170 using the following settings on the S220 focused-ultrasonicator (Covaris): 105W Peak  
171 Incident Power; 5 % Duty Factor, 200 Cycles Per Burst; 40 seconds Treatment Time.  
172 Sheared samples were purified using AmpureXP beads (Agencourt/Seradyn/Beckman  
173 Coulter, A63881) to sample ratio of 0.5X and eluted with 54  $\mu\text{L}$  of EB (Qiagen). Sheared  
174 samples were visualized using a D1K High Sensitivity tape (Agilent, 5067-5363) on an  
175 Agilent 2200 TapeStation and consisted mostly of  $\approx 650$  to 700 bp fragments. Library  
176 construction was carried out on the Biomek FX<sup>P</sup> (Beckman Coulter) using a modified  
177 SWHT (SPRIworks High Throughput for Illumina, Beckman Coulter) method to  
178 accommodate a 700 bp distribution. Bioo Scientific NextFlex DNaseq Library Kit for  
179 Biomek FX<sup>P</sup> (5140-42) was used in conjunction with Bioo Scientific NextFlex DNA  
180 barcodes-96 adaptors (514105). Following library construction, 15  $\mu\text{L}$  of the 25  $\mu\text{L}$  pre-  
181 enrichment library was used as template in a 10-cycle PCR amplification. Library sizes  
182 and concentrations were determined using TapeStation and Quant-iT Picogreen  
183 (Molecular Probes, P7589), respectively. Dilutions were made to 20 nM and pooled in  
184 preparation for a MiSeq run. 30  $\mu\text{L}$  of 20 nM library was diluted to 500  $\mu\text{L}$  using Illumina  
185 buffer HT1 and loaded onto a 500 cycle MiSeq (version 2) flowcell (Illumina, MS-102-  
186 2003). Paired-end run cycle parameters were 260 (Read1) + 8 (Index read) + 260  
187 (Read2). DNA sequences were assembled based on the published encapsulated D39  
188 genome sequence (Lanie *et al.*, 2007). Bioinformatic analyses was performed using  
189 cutadapt (<https://code.google.com/p/cutadapt/>) with a min length of 100 and quality



190 cutoff of 30, and assembled using newbler (Margulies *et al.*, 2005), mapped using  
191 bowtie (Langmead *et al.*, 2009) and called SNPs using mpileup (Li *et al.*, 2009). Full  
192 coverage was obtained for the genomes of each mutant with >175 reads of most base  
193 pairs. Gaps were only present at the expected *cps2A* to *cps2H* and *pbp2b* regions.

### 194

### 195 ***MltG* sequence alignment and secondary structure information (Fig. 5 and S6)**

196 The MltG<sub>Eco</sub> sequence (gi accession 687676267) was aligned with the MltG<sub>Spn</sub> (gi:  
197 116076234) and YceG<sub>Lmo</sub> (gi: 16803539) using Clustal Omega (Sievers *et al.*, 2011)  
198 with default parameters. Secondary structure information of MltG<sub>Eco</sub> was obtained from  
199 the PDB database (PDB ID: 2R1F).

### 200

### 201 ***RNA-Seq analysis (Table 4)***

202 cDNA libraries were prepared from total RNA by the Center for Genomics and  
203 Bioinformatics at Indiana University in Bloomington, Indiana. The mRNA was enriched  
204 from 1 µg of total RNA using RiboZero™ rRNA Removal Kit (Bacteria) (EpiCentre, Inc.).  
205 rRNA-depleted mRNA samples were purified using RNeasy Minelute Cleanup Kit  
206 (Qiagen). Double-stranded cDNA synthesis was performed following ScriptSeq™  
207 Complete Kit (Bacteria) Preparation guide (EpiCentre, Inc.) in accordance with the  
208 manufacturer's standard protocol. Entire resultant mRNA sample was fragmented using  
209 divalent cations via incubation for 5 min at 85°C. The first strand of cDNA was  
210 synthesized by reverse transcription using random-sequence primers containing a  
211 tagging sequence at their 5' ends. Di-tagged cDNA was synthesized by random  
212 annealing of a terminal-Tagging Oligo to the 3' end of the cDNA for extension of the

213 cDNA by DNA polymerase. Di-tagged cDNA was purified using Agencourt AMPure® XP  
214 beads (Beckman Coulter) followed by PCR amplification for 15 cycles using Failsafe™  
215 PCR enzyme and ScriptSeq™ Index PCR Primer set (EpiCentre, Inc.). This step  
216 generated the second strand of cDNA and completed the addition of Illumina adapter  
217 sequences incorporating a user-defined barcode. The amplified libraries were purified  
218 using Agencourt AMPure® XP beads. Quality and quantity were assessed using D1000  
219 TapeStation (Agilent Technologies) and Quant-iT™ PicoGreen® dsDNA Assay Kit (Life  
220 Technologies), respectively. Sequencing was performed at the Greehey Children's  
221 Cancer Research Institute Genome Sequencing Facility at the University of Texas  
222 Health Science Center at San Antonio, Texas. Cluster generation was performed using  
223 TruSeq PE Cluster Kit v3-cBot-HS (Illumina). Single-end, 50 bp sequencing was  
224 performed using TruSeq SBS Kit v3-HS (Illumina) on a HiSeq 2000 sequencer  
225 (Illumina). Image analysis, base calling, sequencing reads de-multiplexing were  
226 followed by default Illumina procedure.

227 The raw sequencing reads were quality and adapter trimmed using Trimmomatic  
228 version 33 (Lohse *et al.*, 2012) with a minimum final read length of 35. The trimmed  
229 reads were mapped onto the *S. pneumoniae* D39 (RefSeq NC\_008533) genome and  
230 D39 plasmid pDP1 sequence (RefSeq NC\_005022) using bowtie2 version 2.1  
231 (Langmead & Salzberg, 2012). Custom PERL scripts were used to generate read  
232 counts for the genes and 100 bp non-overlapping intergenic regions of the genome.  
233 Differential gene expression was identified using DESeq2 (version 1.8.1) (Love *et al.*,  
234 2014) using default parameters (Robinson *et al.*, 2010). The false-discovery rate (FDR)  
235 was calculated using Benjamini and Hochberg's algorithm (Benjamini & Hochberg,

236 1995) and a gene or region was defined as differentially expressed if it had an up- or  
237 down-fold change of 1.8 and their FDR was less than 0.05.

### 238 239 **QRT-PCR analysis (Fig. S15)**

240 RNA from each strain was prepared as described in *Experimental procedures* for  
241 RNA-Seq analysis. Five µg of purified RNA were further treated with DNA-free DNA  
242 Removal Kit (Ambion). 125 ng of treated RNA were used to synthesize cDNA by qScript  
243 Felex cDNA synthesis kit (Quanta Biosciences). RT-PCR was performed using the  
244 Brilliant III Ultra-Fast SYBR Green qPCR Master Mix (Agilent Technologies). Each  
245 reaction contained 10 µl of 2xBrilliant III Ultra-Fast SYBR Green QPCR Master Mix  
246 (Agilent), 2 µl of each 2 µM primers (Table S2), 0.3 µl of a 1:500 dilution of ROX  
247 reference dye and 6 µl of diluted cDNA. Samples were run in an MX3000P thermocycler  
248 (Stratagene) with Program MxPro v. 3.0. QRT-PCR reactions were performed 3 times  
249 each for three independent biological samples. The transcript amounts were normalized  
250 to *gyrA* RNA amount (Table S2). Data were analyzed with the SYBR Green (with  
251 dissociation curve) program on the thermocycler. Four dilutions of cDNA from a wild-  
252 type *S. pneumoniae* strain were used to generate standard curves for each primer set.  
253 For statistical analysis, normalized transcript amounts of *spd\_1874*, *spd\_0104*, and  
254 *pcsB* were tested with a one sample t test (GraphPad Prism) to determine if the mean  
255 was significantly different from a hypothetical value of 1.

259 **Membrane preparation from *S. pneumoniae* cells for zymogram analysis (Fig. S8)**

260 Membrane preparations from strains IU1945 (D39  $\Delta cps$  parent), K5 ( $\Delta lytC$ ), K27  
261 ( $\Delta lytB$ ) and K43 ( $\Delta lytA$ ) were made as previously described with minor modifications  
262 (Wayne *et al.*, 2010). Briefly, 20 mL cultures of each strain were grown in BHI broth to  
263  $OD_{620} \approx 0.3$ . Cells were collected by centrifuging at 16,500  $xg$  for 5 min at 4°C. Pellets  
264 were washed with 2 mL 1 x SMM buffer (0.5 M sucrose, 20 mM  $MgCl_2$ , 20 mM MES pH  
265 6.5) at room temperature and resuspended in 2 mL 1 x SMM buffer. 100  $\mu L$  of 10  
266 mg/mL lysozyme (Sigma), 8  $\mu L$  of 1mg/mL of mutanolysin (Sigma), and 20  $\mu L$  of  
267 protease inhibitor cocktail set III (Calbiochem) were added to each resuspended pellet,  
268 and mixtures were incubated at 37°C for 1 hour to digest cell wall. Protoplasts were  
269 collected as pellets following centrifugation at 8,000  $xg$  for 10 min at room temperature.  
270 Protoplast pellets were frozen on dry ice for 10 min and resuspended in 2 mL of cold  
271 Buffer H (20 mM HEPES, pH 8.0, 200 mM NaCl, 1 mM DTT, and protease inhibitor  
272 cocktail set III). 20  $\mu L$  of 0.1 M  $MgCl_2$ , 20  $\mu L$  of 0.1 M  $CaCl_2$ , 4  $\mu L$  of 5 mg/mL DNase  
273 (Sigma), and 4  $\mu L$  of 10 mg/mL RNase (Sigma) were added to each resuspended pellet,  
274 and the mixtures were incubated on ice for 1 h. Following centrifugation at 16,000  $xg$  for  
275 30 min at 4°C, the pellets were collected as membrane fractions, and were resuspended  
276 in 60  $\mu L$  solubilization buffer (1% (wt/vol) SDS, 0.1% vol/vol Triton-X-100). 5  $\mu L$  was  
277 taken for protein concentration determination with the DC<sup>Tm</sup> protein assay kit (Bio-Rad).  
278 Equal volumes of 2X Laemmli sample buffer (Bio-Rad, 161-0737) without added  $\beta$ -  
279 mercaptoethanol, were added to the remaining membrane solutions. Mixtures were  
280 incubated at 100°C for 10 min before loading into gel lanes for zymogram analysis.

281

### Zymogram analysis (Fig. S8)

Zymogram analysis was performed with a protocol modified from Bartual *et al.*, (2014). Lysed cell preparation from strain IU1945 was used as the PG substrate. 300 mL of strain IU1945 was grown up to  $OD_{620} \approx 0.3$  in BHI broth and collected by centrifugation at 10,000  $xg$  for 10 min at 4 °C. Pellets were washed once with 5 mL of ice-cold buffer containing 100 mM NaCl, 20 mM Tris-HCl pH 7.4 buffer, and resuspended in 1.5 mL of the same buffer. Resuspended cells were incubated at 100 °C for 10 min, followed by centrifugation at 16,000  $xg$  for 10 min. The pellet was resuspended in 1.5 mL of 1.5 M Tris-HCl, pH 8.8 and stored at -20 °C. The 1.5 mL suspension of lysed IU1945 cells was added to a 12% SDS-PAGE resolving gel solution (total volume 7.5 mL) containing 0.33 mL of 1.5 M Tris-HCl (pH 8.8), 75  $\mu$ L of 10% SDS, 2.25 mL of 40% acrylamide (19:1 acrylamide/bis-acrylamide, A9926 Sigma), 3.3 mL water, 37.5  $\mu$ L 10% ammonium persulfate (APS) and 3.75  $\mu$ L TEMED (Bio-Rad, 1610800). 4% SDS-PAGE stacking gel solution was made with a mixture of 470  $\mu$ L of 0.5M Tris-HCl, pH 6.8, 19  $\mu$ L of 10 %SDS, 190  $\mu$ L of 40 % acrylamide, 1.2 mL water, 11  $\mu$ L 10 % APS, and 1.1  $\mu$ L TEMED. 35  $\mu$ g of membrane proteins from strains IU1945, K7, K27 or K43, or 10  $\mu$ L of PageRuler prestained protein ladder (Thermo Scientific) was loaded into each lane. Gel electrophoresis was performed in Tris-glycine SDS buffer for 3h at 150V. The gel was washed with distilled water twice for 30 min each and incubated in  $\approx$ 300 mL of refolding buffer (50 mM NaCl, 20 mM  $MgCl_2$ , 0.5% (vol/vol) Triton X-100, and 20 mM Tris-HCl, pH 7.4) with gentle shaking at 37 °C for 12 to 14 h. Gel images were obtained by photography against a black background.

**TABLE S1.** Bacterial strains used in this study<sup>a</sup>

| <b><i>S. pneumoniae</i> strains</b> |                                                                                                                     |                                    |                                     |
|-------------------------------------|---------------------------------------------------------------------------------------------------------------------|------------------------------------|-------------------------------------|
| Strain number                       | Genotype (description) <sup>b</sup>                                                                                 | Antibiotic resistance <sup>c</sup> | Reference or source                 |
| IU1690                              | D39 <i>cps</i> <sup>+</sup>                                                                                         | None                               | Lanie <i>et al.</i> , 2007          |
| IU1751                              | R6 $\Delta mreCD \langle \rangle aad9$                                                                              | Sp <sup>c</sup> <sup>R</sup>       | Land and Winkler, 2011              |
| IU1824                              | D39 <i>rpsL1</i> $\Delta cps2A'-cps2H'$ = D39 <i>rpsL1</i> $\Delta cps$                                             | Str <sup>R</sup>                   | Lanie <i>et al.</i> , 2007          |
| IU1945                              | D39 $\Delta cps2A'-cps2H'$ = D39 $\Delta cps$                                                                       | None                               | Lanie <i>et al.</i> , 2007          |
| IU2519                              | D39 $\Delta bgaA'::kant1t2-P_{fcsK}-pcsB^+$                                                                         | Kan <sup>R</sup>                   | Barendt <i>et al.</i> , 2009        |
| IU3286                              | D39 <i>rpsL1</i> $\Delta cps2E::P_c-[kan-rpsL^+]$                                                                   | Kan <sup>R</sup> Str <sup>S</sup>  | Ramos-Montanez <i>et al.</i> , 2010 |
| IU3877                              | D39 $\Delta cps \Delta lytB \langle \rangle P_c-[kan-rpsL^+]$                                                       | Kan <sup>R</sup>                   | Barendt <i>et al.</i> , 2011        |
| IU3878                              | D39 $\Delta cps \Delta spd_{0873} \langle \rangle P_c-[kan-rpsL^+]$                                                 | Kan <sup>R</sup>                   | Barendt <i>et al.</i> , 2011        |
| IU3897                              | D39 $\Delta cps \Delta mreCD \langle \rangle P_c-erm$                                                               | Erm <sup>R</sup>                   | Land & Winkler, 2011                |
| IU4970                              | D39 $\Delta cps mreC-L-FLAG^3-P_c-erm$                                                                              | Erm <sup>R</sup>                   | Land & Winkler, 2011                |
| IU6647                              | D39 $\Delta cps \Delta pbp1a::P_c-erm$ (IU1945 X $\Delta pbp1a::P_c-erm$ from E177)                                 | Erm <sup>R</sup>                   | This study                          |
| IU6649                              | D39 $\Delta cps \Delta pbp1b::P_c-erm$ (IU1945 X $\Delta pbp1b::P_c-erm$ from E193)                                 | Erm <sup>R</sup>                   | This study                          |
| IU6662                              | D39 $\Delta cps \Delta pbp1a::P_c-[kan-rpsL^+]$ (IU1945 X $\Delta pbp1a::P_c-[kan-rpsL^+]$ from K164)               | Kan <sup>R</sup>                   | This study                          |
| IU6680                              | D39 $\Delta cps \Delta pbp2a::P_c-[kan-rpsL^+]$ (IU1945 X $\Delta pbp2a::P_c-[kan-rpsL^+]$ from K166)               | Kan <sup>R</sup>                   | This study                          |
| IU6726                              | D39 $\Delta cps rpsL1 \Delta pbp1a::P_c-[kan-rpsL^+]$ (IU1824 X $\Delta pbp1a::P_c-[kan-rpsL^+]$ from K164)         | Kan <sup>R</sup> Str <sup>S</sup>  | This study                          |
| IU6741                              | D39 $\Delta cps rpsL1 \Delta pbp1a$ (IU6726 X fusion $\Delta pbp1a$ )                                               | Str <sup>R</sup> Kan <sup>S</sup>  | This study                          |
| IU7258                              | D39 $\Delta cps \Delta mltG::P_c-[kan-rpsL^+] sup1$ ( <i>pbp1a</i> (G494E)(GGA→GAA) (single colony isolate of K637) | Kan <sup>R</sup>                   | This study                          |
| IU7260                              | D39 $\Delta cps \Delta mltG::P_c-erm sup1$ ( <i>pbp1a</i> ( $\Delta G$ at G451)(GGT <sub>17</sub> →G-T)(single      | Erm <sup>R</sup>                   | This study                          |

|        |                                                                                                                                                           |                                   |                           |
|--------|-----------------------------------------------------------------------------------------------------------------------------------------------------------|-----------------------------------|---------------------------|
|        | colony isolate of E681)                                                                                                                                   |                                   |                           |
| IU7286 | D39 $\Delta cps \Delta mltG::P_c-[kan-rpsL^+] sup2$ ( <i>pbp1a</i> (S89F)(TCT→TTT) (IU1945 X $\Delta mltG::P_c-[kan-rpsL^+]$ from IU7258)                 | Kan <sup>R</sup>                  | This study                |
| IU7287 | D39 $\Delta cps \Delta mltG::P_c-[kan-rpsL^+] sup3$ ( <i>pbp1a</i> ( $\Delta A$ at K160)(AAA→AA-)) (IU1945 X $\Delta mltG::P_c-[kan-rpsL^+]$ from IU7258) | Kan <sup>R</sup>                  | This study                |
| IU7288 | D39 $\Delta cps \Delta mltG::P_c-erm sup2$ ( <i>pbp1a</i> ( $\Omega T$ at F33)(TTC→TTTC))(IU1945 X $\Delta mltG::P_c-erm$ from IU7260)                    | Erm <sup>R</sup>                  | This study                |
| IU7325 | D39 $\Delta cps rpsL1 \Delta pbp1a \Delta mltG::P_c-[kan-rpsL^+]$ (IU6741 X $\Delta mltG::P_c-[kan-rpsL^+]$ from K637)                                    | Kan <sup>R</sup> Str <sup>S</sup> | This study                |
| IU7327 | D39 $\Delta cps rpsL1 \Delta pbp1a \Delta mltG::P_c-erm$ (IU6741 X $\Delta mltG::P_c-erm$ from IU7260)                                                    | Erm <sup>R</sup> Str <sup>R</sup> | This study                |
| IU7337 | D39 $\Delta cps \Delta bgaA::kan-t1t2-P_{fcsK}-pbp2b$                                                                                                     | Kan <sup>R</sup>                  | Tsui <i>et al.</i> , 2014 |
| IU7397 | D39 $\Delta cps \Delta pbp2b<>aad9//\Delta bgaA::kan-t1t2-P_{fcsK}-pbp2b$                                                                                 | Kan <sup>R</sup> Spc <sup>R</sup> | Tsui <i>et al.</i> , 2014 |
| IU7399 | D39 $\Delta cps mltG-HA-P_c-kan$ (IU1945 X fusion <i>mltG-HA-P_c-kan</i> )                                                                                | Kan <sup>R</sup>                  | This study                |
| IU7403 | D39 $\Delta cps mltG-FLAG-P_c-erm$ (IU1945 X fusion <i>mltG-FLAG-P_c-erm</i> )                                                                            | Erm <sup>R</sup>                  | This study                |
| IU7405 | D39 $\Delta cps mltG-Myc-P_c-kan$ (IU1945 X fusion <i>mltG-Myc-P_c-kan</i> )                                                                              | Kan <sup>R</sup>                  | This study                |
| IU7476 | D39 $\Delta cps \Delta pbp2b<>aad9 sup1$ (IU1945 X $\Delta pbp2b<>aad9$ from IU7397)                                                                      | Spc <sup>R</sup>                  | This study                |
| IU7477 | D39 $\Delta cps \Delta pbp2b<>aad9 sup2$ (IU1945 X $\Delta pbp2b<>aad9$ from IU7397)                                                                      | Spc <sup>R</sup>                  | This study                |
| IU7567 | D39 $\Delta cps \Delta pbp2b<>aad9 sup3$ (IU1945 X $\Delta pbp2b<>aad9$ from IU7397)                                                                      | Spc <sup>R</sup>                  | This study                |
| IU7570 | D39 $\Delta cps \Delta pbp2b<>aad9 sup4$ (IU1945 X $\Delta pbp2b<>aad9$ from IU7397)                                                                      | Spc <sup>R</sup>                  | This study                |
| IU7580 | D39 $\Delta cps mreC-L-FLAG^3-P_c-erm mltG-HA-P_c-kan$ (IU4970 X <i>mltG-HA-P_c-kan</i> from IU7399)                                                      | Kan <sup>R</sup> Erm <sup>R</sup> | This study                |
| IU7582 | D39 $\Delta cps mreC-L-FLAG^3-P_c-erm mltG-Myc-P_c-kan$ (IU4970 X <i>mltG-Myc-P_c-kan</i> from IU7405)                                                    | Kan <sup>R</sup> Erm <sup>R</sup> | This study                |
| IU7614 | D39 $\Delta cps rpsL1 ftsZ^+-P_c-[kan-rpsL^+]$ (IU1824 X fusion <i>ftsZ^+-P_c-[kan-rpsL^+]</i> )                                                          | Kan <sup>R</sup> Str <sup>S</sup> | This study                |
| IU7765 | D39 $\Delta cps \Delta pbp2b<>aad9 sup5$ (IU1945 X $\Delta pbp2b<>aad9$ from IU7397)                                                                      | Spc <sup>R</sup>                  | This study                |

|        |                                                                                                                                                               |                                                       |            |
|--------|---------------------------------------------------------------------------------------------------------------------------------------------------------------|-------------------------------------------------------|------------|
| IU7837 | D39 $\Delta cps rpsL1 pbp1a$ (G494E)<br>(IU6726 X <i>pbp1a</i> allele from IU7258)                                                                            | Str <sup>R</sup> Kan <sup>S</sup>                     | This study |
| IU7839 | D39 $\Delta cps rpsL1 pbp1a$ ( $\Delta G$ at G451)<br>(IU6726 X <i>pbp1a</i> allele from IU7260)                                                              | Str <sup>R</sup> Kan <sup>S</sup>                     | This study |
| IU7840 | D39 $\Delta cps rpsL1 pbp1a$ (S89F) (IU6726<br>X <i>pbp1a</i> allele from IU7286)                                                                             | Str <sup>R</sup> Kan <sup>S</sup>                     | This study |
| IU7843 | D39 $\Delta cps rpsL1 pbp1a$ ( $\Delta A$ at K160)<br>(IU6726 X <i>pbp1a</i> allele from IU7287)                                                              | Str <sup>R</sup> Kan <sup>S</sup>                     | This study |
| IU7845 | D39 $\Delta cps rpsL1 pbp1a$ ( $\Omega T$ at F33)<br>(IU6726 X <i>pbp1a</i> allele from IU7288)                                                               | Str <sup>R</sup> Kan <sup>S</sup>                     | This study |
| IU7850 | D39 $\Delta cps \Delta pbp1b::P_c-[kan-rpsL^+]$<br>IU1824 X $\Delta pbp1b::P_c-[kan-rpsL^+]$ from<br>K180                                                     | Kan <sup>R</sup> Str <sup>S</sup>                     | This study |
| IU7852 | D39 $\Delta cps \Delta pbp2a::P_c-[kan-rpsL^+]$<br>IU1824 X $\Delta pbp2a::P_c-[kan-rpsL^+]$ from<br>K166                                                     | Kan <sup>R</sup> Str <sup>S</sup>                     | This study |
| IU7931 | D39 $\Delta cps rpsL1 \Delta pbp1a \Delta mltG::P_c-erm$<br>$\Delta pbp2b \leftrightarrow aad9$ (IU7327 X<br>$\Delta pbp2b \leftrightarrow aad9$ from IU7397) | Erm <sup>R</sup> Str <sup>R</sup>                     | This study |
| IU8549 | D39 $\Delta cps rpsL1 \Delta pbp1a mltG(\Delta 5bp)$<br>(IU7325 X <i>mltG</i> ( $\Delta 5bp$ ) from IU7477)                                                   | Str <sup>R</sup> Kan <sup>S</sup>                     | This study |
| IU8551 | D39 $\Delta cps rpsL1 \Delta pbp1a mltG(Y488D)$<br>(IU7325 X <i>mltG</i> (Y488D) from IU7567)                                                                 | Str <sup>R</sup> Kan <sup>S</sup>                     | This study |
| IU8553 | D39 $\Delta cps rpsL1 \Delta pbp1a mltG(\Delta 488bp)$<br>(IU7325 X <i>mltG</i> ( $\Delta 488bp$ ) from IU7570)                                               | Str <sup>R</sup> Kan <sup>S</sup>                     | This study |
| IU8555 | D39 $\Delta cps rpsL1 \Delta pbp1a mltG(\Omega 45bp)^2$<br>(IU7325 X <i>mltG</i> ( $\Omega 45bp$ ) <sup>2</sup> from IU7765)                                  | Str <sup>R</sup> Kan <sup>S</sup>                     | This study |
| IU8565 | D39 $\Delta cps rpsL1 \Delta pbp1a mltG(\Delta 5bp)$<br>$\Delta pbp2b \leftrightarrow aad9$ (IU8549 X<br>$\Delta pbp2b \leftrightarrow aad9$ from IU7397)     | Str <sup>R</sup> Kan <sup>S</sup><br>Spc <sup>R</sup> | This study |
| IU8567 | D39 $\Delta cps rpsL1 \Delta pbp1a mltG(\Delta 488bp)$<br>$\Delta pbp2b \leftrightarrow aad9$ (IU8553 X<br>$\Delta pbp2b \leftrightarrow aad9$ from IU7397)   | Str <sup>R</sup> Kan <sup>S</sup><br>Spc <sup>R</sup> | This study |
| IU8569 | D39 $\Delta cps rpsL1 \Delta pbp1a mltG(\Omega 45bp)^2$<br>$\Delta pbp2b \leftrightarrow aad9$ (IU8555 X<br>$\Delta pbp2b \leftrightarrow aad9$ from IU7397)  | Str <sup>R</sup> Kan <sup>S</sup><br>Spc <sup>R</sup> | This study |
| IU8872 | D39 $\Delta cps \Delta bgaA::tet-P_{Zn^-}RBS_{mltG^-}mltG^+$<br>(IU1945 X fusion $\Delta bgaA::tet-P_{Zn^-}$<br>$RBS_{mltG^-}mltG^+$ )                        | Tet <sup>R</sup>                                      | This study |
| IU8873 | D39 $\Delta cps rpsL1 \Delta pbp1a mltG(E428Q)$<br>(IU7325 X fusion <i>mltG</i> (E428Q))                                                                      | Str <sup>R</sup> Kan <sup>S</sup>                     | This study |
| IU8910 | D39 $\Delta cps rpsL1 \Delta pbp1a$<br><i>mltG</i> ( $\Delta DUF\_1346$ ) (IU7325 X fusion<br><i>mltG</i> ( $\Delta DUF\_1346$ ))                             | Str <sup>R</sup> Kan <sup>S</sup>                     | This study |



|        |                                                                                                                                                      |                                                       |            |
|--------|------------------------------------------------------------------------------------------------------------------------------------------------------|-------------------------------------------------------|------------|
| IU8964 | D39 $\Delta cps rpsL1 \Delta pbp1a mltG(E428Q) \Delta pbp2b \langle \rightarrow aad9$ (IU8873 X $\Delta pbp2b \langle \rightarrow aad9$ from IU7397) | Str <sup>R</sup> Kan <sup>S</sup><br>Spc <sup>R</sup> | This study |
| IU8980 | D39 $\Delta cps rpsL1 P_c-[kan-rpsL^+]-mltG^+$ (IU1824 X fusion $P_c-[kan-rpsL^+]-mltG^+$ )                                                          | Kan <sup>R</sup> Str <sup>S</sup>                     | This study |
| IU8982 | D39 $\Delta cps rpsL1 \Delta pbp1a mltG(E428A)$ (IU7325 X fusion $mltG(E428A)$ )                                                                     | Str <sup>R</sup> Kan <sup>S</sup>                     | This study |
| IU8986 | D39 $\Delta cps rpsL1 mltG^+-P_c-[kan-rpsL^+]$ (IU1824 X fusion $mltG^+-P_c-[kan-rpsL^+]$ )                                                          | Kan <sup>R</sup> Str <sup>S</sup>                     | This study |
| IU9025 | D39 $\Delta cps rpsL1 mltG(\Delta DUF\_1346) pbp1a^+$ (IU8980 X $mltG(\Delta DUF\_1346)$ from IU8910)                                                | Str <sup>R</sup> Kan <sup>S</sup>                     | This study |
| IU9041 | D39 $\Delta cps rpsL1 \Delta pbp1a mltG(E428Q)-FLAG-P_c-erm$ (IU7325 X fusion $mltG(E428Q)-FLAG-P_c-erm$ )                                           | Erm <sup>R</sup> Str <sup>R</sup>                     | This study |
| IU9043 | D39 $\Delta cps rpsL1 \Delta pbp1a mltG-FLAG-P_c-erm$ (IU7325 X $mltG-FLAG-P_c-erm$ from IU7403)                                                     | Erm <sup>R</sup> Str <sup>R</sup>                     | This study |
| IU9100 | D39 $\Delta cps \Delta mltG::P_c-erm//\Delta bgaA::tet-P_{Zn}-RBS_{mltG}-mltG^+$ (IU8872 X $\Delta mltG::P_c-erm$ from IU7260)                       | Tet <sup>R</sup> Erm <sup>R</sup>                     | This study |
| IU9102 | D39 $\Delta cps \Delta mltG::P_c-aad9//\Delta bgaA::tet-P_{Zn}-RBS_{mltG}-mltG^+$ (IU8872 X fusion $\Delta mltG::P_c-aad9$ )                         | Tet <sup>R</sup> Spc <sup>R</sup>                     | This study |
| IU9148 | D39 $\Delta cps rpsL1 ftsZ-L_2-mKate2$ (IU7614 X fusion $ftsZ-L_2-mKate2$ )                                                                          | Str <sup>R</sup> Kan <sup>S</sup>                     | This study |
| IU9231 | D39 $\Delta cps rpsL1 \Delta walk::P_c-[kan-rpsL^+]$ (IU1824 X $\Delta walk::P_c-[kan-rpsL^+]$ from K208)                                            | Kan <sup>R</sup> Str <sup>S</sup>                     | This study |
| IU9233 | D39 $\Delta cps rpsL1 \Delta pbp1a \Delta walk::P_c-[kan-rpsL^+]$ (IU6741 X $\Delta walk::P_c-[kan-rpsL^+]$ from K208)                               | Kan <sup>R</sup> Str <sup>S</sup>                     | This study |
| IU9235 | D39 $\Delta cps rpsL1 \Delta pbp1a \Delta mltG::P_c-erm \Delta walk::P_c-[kan-rpsL^+]$ (IU7327 X $\Delta walk::P_c-[kan-rpsL^+]$ from K208)          | Kan <sup>R</sup> Erm <sup>R</sup><br>Str <sup>S</sup> | This study |
| IU9278 | D39 $\Delta cps rpsL1 \Delta pmp23::P_c-[kan-rpsL^+]$ (IU1824 X $\Delta pmp23::P_c-[kan-rpsL^+]$ from K37)                                           | Kan <sup>R</sup> Str <sup>S</sup>                     | This study |
| IU9290 | D39 $\Delta cps rpsL1 \Delta pbp1a \Delta mltG::P_c-erm \Delta pmp23::P_c-[kan-rpsL^+]$ (IU7327 X $\Delta pmp23::P_c-[kan-rpsL^+]$ from K37)         | Kan <sup>R</sup> Str <sup>S</sup>                     | This study |
| IU9292 | D39 $\Delta cps rpsL1 \Delta pbp1a \Delta mltG::P_c-erm \Delta spd\_1874::P_c-[kan-rpsL^+]$ (IU7327 X $\Delta spd\_1874::P_c-[kan-rpsL^+]$ from K57) | Kan <sup>R</sup> Str <sup>S</sup>                     | This study |

|        |                                                                                                                                                                 |                                                       |            |
|--------|-----------------------------------------------------------------------------------------------------------------------------------------------------------------|-------------------------------------------------------|------------|
| IU9294 | D39 $\Delta cps rpsL1 \Delta pbp1a \Delta mltG::P_c-erm \Delta lytC::P_c-[kan-rpsL^+]$ (IU7327 X $\Delta lytC::P_c-[kan-rpsL^+]$ from K5)                       | Kan <sup>R</sup> Str <sup>S</sup>                     | This study |
| IU9296 | D39 $\Delta cps rpsL1 \Delta pbp1a \Delta mltG::P_c-erm \Delta spd_0873<>P_c-[kan-rpsL^+]$ (IU7327 X $\Delta spd_0873<>P_c-[kan-rpsL^+]$ from K29)              | Kan <sup>R</sup> Str <sup>S</sup>                     | This study |
| IU9298 | D39 $\Delta cps rpsL1 \Delta pbp1a \Delta mltG::P_c-erm \Delta lytB::P_c-[kan-rpsL^+]$ (IU7327 X $\Delta lytB::P_c-[kan-rpsL^+]$ from K27)                      | Kan <sup>R</sup> Str <sup>S</sup>                     | This study |
| IU9316 | D39 $\Delta cps rpsL1 \Delta pbp1a \Delta mltG::P_c-erm \Delta spd_0104::P_c-[kan-rpsL^+]$ (IU7327 X $\Delta spd_0104::P_c-[kan-rpsL^+]$ from K15)              | Kan <sup>R</sup> Str <sup>S</sup>                     | This study |
| IU9318 | D39 $\Delta cps rpsL1 \Delta pbp1a \Delta mltG::P_c-erm \Delta spd_0703::P_c-[kan-rpsL^+]$ (IU7327 X $\Delta spd_0703::P_c-[kan-rpsL^+]$ from K489)             | Kan <sup>R</sup> Str <sup>S</sup>                     | This study |
| IU9320 | D39 $\Delta cps rpsL1 \Delta pbp1a \Delta mltG::P_c-erm \Delta pspA::P_c-[kan-rpsL^+]$ (IU7327 X $\Delta pspA::P_c-[kan-rpsL^+]$ from K75)                      | Kan <sup>R</sup> Str <sup>S</sup>                     | This study |
| IU9330 | D39 $\Delta cps rpsL1 \Delta pbp1a mltG(\Delta 488bp) \Delta bgaA'::kant1t2-P_{fcsK^-} pcsB^+$ (IU8553 X $\Delta bgaA'::kant1t2-P_{fcsK^-} pcsB^+$ from IU2519) | Kan <sup>R</sup> Str <sup>R</sup>                     | This study |
| IU9382 | D39 $\Delta cps rpsL1 \Delta pbp1a \Delta mltG::P_c-erm \Delta lytA::P_c-[kan-rpsL^+]$ (IU7327 X $\Delta lytA::P_c-[kan-rpsL^+]$ from K43)                      | Kan <sup>R</sup> Str <sup>S</sup>                     | This study |
| IU9384 | D39 $\Delta cps rpsL1 \Delta pbp1a \Delta mltG::P_c-erm \Delta cbpD::P_c-[kan-rpsL^+]$ (IU7327 X $\Delta cbpD::P_c-[kan-rpsL^+]$ from K148)                     | Kan <sup>R</sup> Str <sup>S</sup>                     | This study |
| IU9386 | D39 $\Delta cps rpsL1 \Delta pbp1a \Delta mltG::P_c-erm \Delta dacA::P_c-[kan-rpsL^+]$ (IU7327 X $\Delta dacA::P_c-[kan-rpsL^+]$ from K35)                      | Kan <sup>R</sup> Str <sup>S</sup>                     | This study |
| IU9388 | D39 $\Delta cps rpsL1 \Delta pbp1a \Delta mltG::P_c-erm \Delta dacB::P_c-[kan-rpsL^+]$ (IU7327 X $\Delta dacB::P_c-[kan-rpsL^+]$ from K25)                      | Kan <sup>R</sup> Str <sup>S</sup>                     | This study |
| IU9390 | D39 $\Delta cps rpsL1 \Delta pbp1a \Delta mltG::P_c-erm \Delta spd_0173::P_c-[kan-rpsL^+]$ (IU7327 X $\Delta spd_0173::P_c-[kan-rpsL^+]$ from K372)             | Kan <sup>R</sup> Str <sup>S</sup>                     | This study |
| IU9445 | D39 $\Delta cps rpsL1 \Delta pbp1a mltG(E428A)-FLAG-P_c-erm$ (IU7325 X fusion $mltG(E428A)-FLAG-P_c-erm$ )                                                      | Erm <sup>R</sup> Str <sup>R</sup>                     | This study |
| IU9759 | D39 $\Delta cps rpsL1 \Delta pbp1a::P_c-[kan-rpsL^+] mltG(\Delta 5bp) \Delta pbp2b<>aad9$ (IU8565 X $\Delta pbp1a::P_c-[kan-rpsL^+]$ from K164)                 | Kan <sup>R</sup> Str <sup>S</sup><br>Spc <sup>R</sup> | This study |
| IU9760 | D39 $\Delta cps rpsL1 mltG(Y488D)$ (IU8986)                                                                                                                     | Str <sup>R</sup> Kan <sup>S</sup>                     | This study |

|         |                                                                                                                                                                                                                                                                   |                                                       |            |
|---------|-------------------------------------------------------------------------------------------------------------------------------------------------------------------------------------------------------------------------------------------------------------------|-------------------------------------------------------|------------|
|         | X <i>mltG</i> (Y488D) from IU7567)                                                                                                                                                                                                                                |                                                       |            |
| IU9765  | D39 $\Delta cps \Delta bgaA::tet-P_{Zn}-RBS_{ftsA^-}$<br><i>rodZ</i> ( <i>spd_2050</i> ) <sup>+</sup> (IU1945 X fusion<br>$\Delta bgaA::tet-P_{Zn}-RBS_{ftsA^-}$ <i>rodZ</i> )                                                                                    | Tet <sup>R</sup>                                      | This study |
| IU9771  | D39 <i>cps</i> <sup>+</sup> $\Delta mltG::P_c-erm$ (IU1690 X<br>$\Delta mltG::P_c-erm$ from E681), <i>pbp1a</i><br>sequenced to contain no mutation                                                                                                               | Erm <sup>R</sup>                                      | This study |
| IU9772  | D39 <i>cps</i> <sup>+</sup> $\Delta mltG::P_c-erm$ (IU1690 X<br>$\Delta mltG::P_c-erm$ from E681), second<br>isolate, <i>pbp1a</i> sequenced to contain no<br>mutation                                                                                            | Erm <sup>R</sup>                                      | This study |
| IU9777  | D39 $\Delta cps rpsL1 pbp1a^+ mltG(\Delta 5bp)$<br>$\Delta pbp2b \leftrightarrow aad9$ (IU9759 X <i>pbp1a</i> <sup>+</sup> from<br>IU1690)                                                                                                                        | Str <sup>R</sup> Kan <sup>S</sup><br>Spc <sup>R</sup> | This study |
| IU9783  | D39 $\Delta cps rpsL1 mltG(Y488D)$<br>$\Delta pbp2b \leftrightarrow aad9$ (IU9760 X<br>$\Delta pbp2b \leftrightarrow aad9$ from IU7397)                                                                                                                           | Str <sup>R</sup> Kan <sup>S</sup><br>Spc <sup>R</sup> | This study |
| IU9877  | D39 $\Delta cps rpsL1 \Delta pbp1a::P_c-[kan-rpsL^+]$<br><i>mltG</i> ( $\Delta 488bp$ ) $\Delta pbp2b \leftrightarrow aad9$ (IU8567<br>X $\Delta pbp1a::P_c-[kan-rpsL^+]$ from K164)                                                                              | Kan <sup>R</sup> Str <sup>S</sup><br>Spc <sup>R</sup> | This study |
| IU9879  | D39 $\Delta cps rpsL1 \Delta pbp1a::P_c-[kan-rpsL^+]$<br><i>mltG</i> ( $\Omega 45bp$ ) <sup>2</sup> $\Delta pbp2b \leftrightarrow aad9$ (IU8569<br>X $\Delta pbp1a::P_c-[kan-rpsL^+]$ from K164)                                                                  | Kan <sup>R</sup> Str <sup>S</sup><br>Spc <sup>R</sup> | This study |
| IU9895  | D39 $\Delta cps mltG(Y488D)-P_c-erm$ (IU1945<br>X fusion <i>mltG</i> (Y488D)- <i>P_c-erm</i> )                                                                                                                                                                    | Erm <sup>R</sup>                                      | This study |
| IU9897  | D39 <i>cps</i> <sup>+</sup> $\Delta mltG::P_c-erm$<br>$\Delta pbp2b \leftrightarrow aad9$ (IU9711 X<br>$\Delta pbp2b \leftrightarrow aad9$ from IU7397)                                                                                                           | Erm <sup>R</sup><br>Spc <sup>R</sup>                  | This study |
| IU9899  | D39 <i>cps</i> <sup>+</sup> $\Delta mltG::P_c-erm \Delta cps2E::P_c-$<br>$[kan-rpsL^+]$ <i>pbp1a</i> ( $\Delta T@F33$ ) (IU9771 X<br>$\Delta cps2E::P_c-[kan-rpsL^+]$ from IU3286),<br><i>pbp1a</i> sequenced to acquire a<br>spontaneous $\Delta T@F33$ mutation | Erm <sup>R</sup> Kan <sup>R</sup>                     | This study |
| IU9905  | D39 $\Delta cps rpsL1 pbp1a^+ mltG(\Delta 488bp)$<br>$\Delta pbp2b \leftrightarrow aad9$ (IU9877 X <i>pbp1a</i> <sup>+</sup> from<br>IU1690)                                                                                                                      | Str <sup>R</sup> Kan <sup>S</sup><br>Spc <sup>R</sup> | This study |
| IU9907  | D39 $\Delta cps rpsL1 pbp1a^+ mltG(\Omega 45bp)^2$<br>$\Delta pbp2b \leftrightarrow aad9$ (IU9879 X <i>pbp1a</i> <sup>+</sup> from<br>IU1690)                                                                                                                     | Str <sup>R</sup> Kan <sup>S</sup><br>Spc <sup>R</sup> | This study |
| IU9931  | D39 $\Delta cps$<br>$\Delta rodZ$ ( <i>spd_2050</i> ) $\leftrightarrow aad9//\Delta bgaA::tet-$<br>$P_{Zn}-RBS_{ftsA^-}$ <i>rodZ</i> <sup>+</sup> (IU9765 X fusion<br>$\Delta rodZ \leftrightarrow aad9$ )                                                        | Tet <sup>R</sup> Spc <sup>R</sup>                     | This study |
| IU10021 | D39 <i>cps</i> <sup>+</sup> $\Delta mltG::P_c-erm \Delta pbp1a::P_c-$                                                                                                                                                                                             | Erm <sup>R</sup>                                      | This study |

|         |                                                                                                                                                                                                                                                                                                                                                    |                                                      |            |
|---------|----------------------------------------------------------------------------------------------------------------------------------------------------------------------------------------------------------------------------------------------------------------------------------------------------------------------------------------------------|------------------------------------------------------|------------|
|         | [ <i>kan-rpsL</i> <sup>+</sup> ](IU9711 X $\Delta$ <i>pbp1a</i> ::P <sub>c</sub> -[ <i>kan-rpsL</i> <sup>+</sup> ] from K164))                                                                                                                                                                                                                     | Kan <sup>R</sup>                                     |            |
| IU10048 | D39 <i>cps</i> <sup>+</sup> $\Delta$ <i>mltG</i> ::P <sub>c</sub> - <i>erm</i> $\Delta$ <i>cps2E</i> :: P <sub>c</sub> -[ <i>kan-rpsL</i> <sup>+</sup> ] <i>pbp1a</i> (G559stop) (IU9771 X $\Delta$ <i>cps2E</i> :: P <sub>c</sub> -[ <i>kan-rpsL</i> <sup>+</sup> ] from IU3286), <i>pbp1a</i> sequenced to acquire a G559stop (GGA→TGA) mutation | Erm <sup>R</sup> Kan <sup>R</sup>                    | This study |
| IU10228 | D39 $\Delta$ <i>cps rpsL1 gfp-L<sub>1</sub>-mltG</i> (IU8980 X fusion <i>gfp-L<sub>1</sub>-mltG</i> )                                                                                                                                                                                                                                              | Str <sup>R</sup> Kan <sup>S</sup>                    | This study |
| IU10292 | D39 $\Delta$ <i>cps rpsL1</i> $\Delta$ <i>pbp1a</i> $\Delta$ <i>mltG</i> ::P <sub>c</sub> - <i>erm</i> $\Delta$ <i>spd_1874</i> ::P <sub>c</sub> -[ <i>kan-rpsL</i> <sup>+</sup> ] $\Delta$ <i>spd_0104</i> ::P <sub>c</sub> - <i>cat</i> (IU9292 X fusion $\Delta$ <i>spd_0104</i> ::P <sub>c</sub> - <i>cat</i> )                                | Kan <sup>R</sup> Str <sup>S</sup><br>Cm <sup>R</sup> | This study |
| IU10294 | D39 $\Delta$ <i>cps rpsL1</i> $\Delta$ <i>pbp1a</i> $\Delta$ <i>mltG</i> ::P <sub>c</sub> - <i>erm</i> $\Delta$ <i>spd_0104</i> ::P <sub>c</sub> -[ <i>kan-rpsL</i> <sup>+</sup> ] $\Delta$ <i>spd_1874</i> ::P <sub>c</sub> - <i>cat</i> (IU9316 X fusion $\Delta$ <i>spd_1874</i> ::P <sub>c</sub> - <i>cat</i> )                                | Kan <sup>R</sup> Str <sup>S</sup><br>Cm <sup>R</sup> | This study |
| IU10318 | D39 $\Delta$ <i>cps rpsL1 gfp-L<sub>1</sub>-mltG ftsZ</i> <sup>+</sup> -P <sub>c</sub> -[ <i>kan-rpsL</i> <sup>+</sup> ] (IU10228 X <i>ftsZ</i> <sup>+</sup> -P <sub>c</sub> -[ <i>kan-rpsL</i> <sup>+</sup> ] from IU7614)                                                                                                                        | Kan <sup>R</sup> Str <sup>S</sup>                    | This study |
| IU10320 | D39 $\Delta$ <i>cps rpsL1</i> $\Delta$ <i>pbp1a mltG</i> ( $\Delta$ 5bp)-FLAG-P <sub>c</sub> - <i>erm</i> (IU7325 X fusion <i>mltG</i> ( $\Delta$ 45bp) <sup>2</sup> -FLAG-P <sub>c</sub> - <i>erm</i> )                                                                                                                                           | Erm <sup>R</sup> Str <sup>R</sup>                    | This study |
| IU10323 | D39 $\Delta$ <i>cps rpsL1</i> $\Delta$ <i>pbp1a mltG</i> (Y488D)-FLAG-P <sub>c</sub> - <i>erm</i> (IU7325 X fusion <i>mltG</i> (Y488D)-FLAG-P <sub>c</sub> - <i>erm</i> )                                                                                                                                                                          | Erm <sup>R</sup> Str <sup>R</sup>                    | This study |
| IU10324 | D39 $\Delta$ <i>cps rpsL1</i> $\Delta$ <i>pbp1a mltG</i> ( $\Delta$ 488bp)-FLAG-P <sub>c</sub> - <i>erm</i> (IU7325 X fusion <i>mltG</i> ( $\Delta$ 488bp)-FLAG-P <sub>c</sub> - <i>erm</i> )                                                                                                                                                      | Erm <sup>R</sup> Str <sup>R</sup>                    | This study |
| IU10327 | D39 $\Delta$ <i>cps rpsL1</i> $\Delta$ <i>pbp1a mltG</i> ( $\Omega$ 45bp) <sup>2</sup> -FLAG-P <sub>c</sub> - <i>erm</i> (IU7325 X fusion <i>mltG</i> ( $\Omega$ 45bp) <sup>2</sup> -FLAG-P <sub>c</sub> - <i>erm</i> )                                                                                                                            | Erm <sup>R</sup> Str <sup>R</sup>                    | This study |
| IU10342 | D39 $\Delta$ <i>cps rpsL1 mltG</i> (E428Q) (IU8986 X <i>mltG</i> (E428Q) from IU8873. This strain was sequenced to be <i>pbp1a</i> <sup>+</sup> , but grew poorly and was genetically unstable                                                                                                                                                     | Str <sup>R</sup> Kan <sup>S</sup>                    | This study |
| IU10353 | D39 $\Delta$ <i>cps rpsL1 gfp-L<sub>1</sub>-mltG ftsZ-L<sub>2</sub>-mKate2</i> (IU10318 X <i>ftsZ-L<sub>2</sub>-mKate2</i> from IU9148)                                                                                                                                                                                                            | Str <sup>R</sup> Kan <sup>S</sup>                    | This study |
| IU10369 | D39 $\Delta$ <i>cps pbp1a</i> <sup>+</sup> <i>mltG</i> (Y488D)-FLAG-P <sub>c</sub> - <i>erm</i> (IU1945 X <i>mltG</i> (Y488D)-FLAG-P <sub>c</sub> - <i>erm</i> from IU10323), <i>pbp1a</i> was sequence-confirmed to be <i>pbp1a</i> <sup>+</sup>                                                                                                  | Erm <sup>R</sup>                                     | This study |
| IU10628 | D39 $\Delta$ <i>cps</i> $\Delta$ <i>pbp1a</i>                                                                                                                                                                                                                                                                                                      | Str <sup>R</sup> Kan <sup>S</sup>                    | This study |

|         |                                                                                                                                                                                                           |                                |            |
|---------|-----------------------------------------------------------------------------------------------------------------------------------------------------------------------------------------------------------|--------------------------------|------------|
|         | $\Delta rodZ(sp d_{2050}) \langle \rightarrow aad9$ (IU6741 X $\Delta rodZ \langle \rightarrow aad9$ from IU9931)                                                                                         | $Spc^R$                        |            |
| IU10651 | D39 $\Delta cps pbp1a^+ mltG(Y488D)$ $\Delta mreCD \langle \rightarrow aad9$ (IU9760 X $\Delta mreCD \langle \rightarrow aad9$ from IU1751), $pbp1a$ was sequence-confirmed to be $pbp1a^+$               | $Str^R Kan^S$<br>$Spc^R$       | This study |
| IU10656 | D39 $\Delta cps pbp1a^+ mltG(Y488D)$ $\Delta rodZ(sp d_{2050}) \langle \rightarrow aad9$ (IU9760 X $\Delta rodZ \langle \rightarrow aad9$ from IU9931), $pbp1a$ was sequence-confirmed to be $pbp1a^+$    | $Str^R Kan^S$<br>$Spc^R$       | This study |
| IU10731 | D39 $\Delta cps rpsL1 \Delta pbp1a mltG(\Delta 488bp)$ $\Delta mreCD \langle \rightarrow P_c-erm$ (IU8553 X $\Delta mreCD \langle \rightarrow P_c-erm$ from IU3897)                                       | $Str^R Kan^S$<br>$Erm^R$       | This study |
| IU10743 | D39 $\Delta cps rpsL1 \Delta pbp1a mltG(\Delta 488bp)$ $\Delta pbp2b \langle \rightarrow aad9 \Delta mreCD \langle \rightarrow P_c-erm$ (IU8567 X $\Delta mreCD \langle \rightarrow P_c-erm$ from IU3897) | $Str^R Kan^S$<br>$Spc^R Erm^R$ | This study |
| IU10783 | D39 $\Delta cps rpsL1 mltG(Y488D)$ $\Delta pbp2b \langle \rightarrow aad9 \Delta rodZ(sp d_{2050})::P_c-[kan-rpsL^+]$ (IU9783 X $\Delta rodZ::P_c-[kan-rpsL^+]$ from K654)                                | $Str^R Spc^R$<br>$Kan^R$       | This study |
| IU10785 | D39 $\Delta cps rpsL1 \Delta pbp1a mltG(\Delta 488bp)$ $\Delta mreCD \langle \rightarrow P_c-erm$ $\Delta rodZ(sp d_{2050})::P_c-[kan-rpsL^+]$ (IU10731 X $\Delta rodZ::P_c-[kan-rpsL^+]$ from K654)      | $Str^R Erm^R$<br>$Kan^R$       | This study |
| IU10829 | D39 $\Delta cps rpsL1 mltG(Y488D)$ $\Delta walk::P_c-[kan-rpsL^+]$ (IU9760 X $\Delta walk::P_c-[kan-rpsL^+]$ from K208)                                                                                   | $Kan^R Str^S$                  | This study |
| IU10919 | D39 $\Delta cps rpsL1 mltG_{Spn-Eco} P_c-erm$ (IU1824 X fusion $mltG_{Spn-Eco} P_c-erm$ )                                                                                                                 | $Erm^R$                        | This study |
| IU10921 | D39 $\Delta cps \Delta bgaA::tet-P_{Zn}-RBS_{rodA-rodA^+}$ (IU1945 X fusion $\Delta bgaA::tet-P_{Zn}-RBS_{rodA-rodA}$ )                                                                                   | $Tet^R$                        | This study |
| IU10943 | D39 $\Delta cps rpsL1 mltG(Y488D)$ $\Delta rodA::P_c-erm$ (IU9760 X fusion $\Delta rodA::P_c-erm$ )                                                                                                       | $Erm^R$                        | This study |
| IU10945 | D39 $\Delta cps rpsL1 mltG(Y488D)$ $\Delta rodA::P_c-[kan-rpsL^+]$ (IU9760 X fusion $\Delta rodA::P_c-[kan-rpsL^+]$ )                                                                                     | $Kan^R$                        | This study |
| IU10965 | D39 $\Delta cps rpsL1 \Delta pbp1a mltG_{Spn-Eco} P_c-erm$ (IU6741 X $mltG_{Spn-Eco} P_c-erm$ from IU10919)                                                                                               | $Str^R Kan^S$<br>$Erm^R$       | This study |
| IU11007 | D39 $\Delta cps rpsL1 mltG_{Eco} P_c-erm$                                                                                                                                                                 | $Erm^R$                        | This study |

|         |                                                                                                                                                                                                                  |                  |                           |
|---------|------------------------------------------------------------------------------------------------------------------------------------------------------------------------------------------------------------------|------------------|---------------------------|
|         | (IU1824 X fusion <i>mltG</i> <sub>Eco</sub> -P <sub>c</sub> - <i>erm</i> )                                                                                                                                       |                  |                           |
| IU11009 | D39 $\Delta$ <i>cps rpsL1</i> $\Delta$ <i>pbp1a</i> <i>mltG</i> <sub>Eco</sub> -P <sub>c</sub> - <i>erm</i><br>(IU6741 X fusion <i>mltG</i> <sub>Eco</sub> -P <sub>c</sub> - <i>erm</i> )                        | Erm <sup>R</sup> | This study                |
| E177    | D39 $\Delta$ <i>cps</i> $\Delta$ <i>pbp1a</i> ::P <sub>c</sub> - <i>erm</i>                                                                                                                                      | Erm <sup>R</sup> | Land <i>et al.</i> , 2013 |
| E193    | D39 $\Delta$ <i>cps</i> $\Delta$ <i>pbp1b</i> ::P <sub>c</sub> - <i>erm</i>                                                                                                                                      | Erm <sup>R</sup> | Land & Winkler, 2011      |
| E655    | D39 $\Delta$ <i>cps</i> $\Delta$ <i>rodZ</i> ( <i>spd_2050</i> )::P <sub>c</sub> - <i>erm</i> ,<br>(likely has suppressor) (IU1945 X<br>fusion $\Delta$ <i>rodZ</i> ::P <sub>c</sub> - <i>erm</i> )              | Erm <sup>R</sup> | This study                |
| E681    | D39 $\Delta$ <i>cps</i> $\Delta$ <i>mltG</i> ::P <sub>c</sub> - <i>erm</i> (IU1945 X<br>fusion $\Delta$ <i>mltG</i> ::P <sub>c</sub> - <i>erm</i> )                                                              | Erm <sup>R</sup> | This study                |
| K5      | D39 $\Delta$ <i>cps</i> $\Delta$ <i>lytC</i> ::P <sub>c</sub> -[ <i>kan-rpsL</i> <sup>+</sup> ] (IU1945<br>X fusion $\Delta$ <i>lytC</i> ::P <sub>c</sub> -[ <i>kan-rpsL</i> <sup>+</sup> ])                     | Kan <sup>R</sup> | This study                |
| K15     | D39 $\Delta$ <i>cps</i> $\Delta$ <i>spd_0104</i> ::P <sub>c</sub> -[ <i>kan-rpsL</i> <sup>+</sup> ]<br>(IU1945 X fusion $\Delta$ <i>spd_0104</i> ::P <sub>c</sub> -[ <i>kan-rpsL</i> <sup>+</sup> ])             | Kan <sup>R</sup> | This study                |
| K25     | D39 $\Delta$ <i>cps</i> $\Delta$ <i>dacB</i> ::P <sub>c</sub> -[ <i>kan-rpsL</i> <sup>+</sup> ]<br>(IU1945 X fusion $\Delta$ <i>dacB</i> ::P <sub>c</sub> -[ <i>kan-rpsL</i> <sup>+</sup> ])                     | Kan <sup>R</sup> | This study                |
| K27     | D39 $\Delta$ <i>cps</i> $\Delta$ <i>lytB</i> >P <sub>c</sub> -[ <i>kan-rpsL</i> <sup>+</sup> ]<br>(Regrowth of IU3877)                                                                                           | Kan <sup>R</sup> | This study                |
| K29     | D39 $\Delta$ <i>cps</i> $\Delta$ <i>spd_0873</i> ::P <sub>c</sub> -[ <i>kan-rpsL</i> <sup>+</sup> ]<br>(Regrowth of IU3878)                                                                                      | Kan <sup>R</sup> | This study                |
| K35     | D39 $\Delta$ <i>cps</i> $\Delta$ <i>dacA</i> ::P <sub>c</sub> -[ <i>kan-rpsL</i> <sup>+</sup> ]<br>(IU1945 X fusion $\Delta$ <i>dacA</i> ::P <sub>c</sub> -[ <i>kan-rpsL</i> <sup>+</sup> ])                     | Kan <sup>R</sup> | This study                |
| K37     | D39 $\Delta$ <i>cps</i> $\Delta$ <i>pmp23</i> ::P <sub>c</sub> -[ <i>kan-rpsL</i> <sup>+</sup> ]<br>(IU1945 X fusion $\Delta$ <i>pmp23</i> ::P <sub>c</sub> -[ <i>kan-rpsL</i> <sup>+</sup> ])                   | Kan <sup>R</sup> | This study                |
| K43     | D39 $\Delta$ <i>cps</i> $\Delta$ <i>lytA</i> ::P <sub>c</sub> -[ <i>kan-rpsL</i> <sup>+</sup> ] (IU1945<br>X fusion $\Delta$ <i>lytA</i> ::P <sub>c</sub> -[ <i>kan-rpsL</i> <sup>+</sup> ])                     | Kan <sup>R</sup> | This study                |
| K57     | D39 $\Delta$ <i>cps</i> $\Delta$ <i>spd_1874</i> ::P <sub>c</sub> -[ <i>kan-rpsL</i> <sup>+</sup> ]<br>(IU1945 X fusion $\Delta$ <i>spd_1874</i> ::P <sub>c</sub> -[ <i>kan-rpsL</i> <sup>+</sup> ])             | Kan <sup>R</sup> | This study                |
| K75     | D39 $\Delta$ <i>cps</i> $\Delta$ <i>pspA</i> ::P <sub>c</sub> -[ <i>kan-rpsL</i> <sup>+</sup> ]<br>(IU1945 X fusion $\Delta$ <i>pspA</i> ::P <sub>c</sub> -[ <i>kan-rpsL</i> <sup>+</sup> ])                     | Kan <sup>R</sup> | This study                |
| K148    | D39 $\Delta$ <i>cps</i> $\Delta$ <i>cbpD</i> ::P <sub>c</sub> -[ <i>kan-rpsL</i> <sup>+</sup> ]<br>(IU1945 X fusion $\Delta$ <i>cbpD</i> ::P <sub>c</sub> -[ <i>kan-rpsL</i> <sup>+</sup> ])                     | Kan <sup>R</sup> | This study                |
| K164    | D39 $\Delta$ <i>cps</i> $\Delta$ <i>pbp1a</i> ::P <sub>c</sub> -[ <i>kan-rpsL</i> <sup>+</sup> ]<br>(IU1945 transformed with fusion<br>$\Delta$ <i>pbp1a</i> ::P <sub>c</sub> -[ <i>kan-rpsL</i> <sup>+</sup> ]) | Kan <sup>R</sup> | This study                |
| K166    | D39 $\Delta$ <i>cps</i> $\Delta$ <i>pbp2a</i> ::P <sub>c</sub> -[ <i>kan-rpsL</i> <sup>+</sup> ]<br>(IU1945 X fusion $\Delta$ <i>pbp2a</i> ::P <sub>c</sub> -[ <i>kan-rpsL</i> <sup>+</sup> ])                   | Kan <sup>R</sup> | This study                |
| K180    | D39 $\Delta$ <i>cps</i> $\Delta$ <i>pbp1b</i> ::P <sub>c</sub> -[ <i>kan-rpsL</i> <sup>+</sup> ]                                                                                                                 | Kan <sup>R</sup> | Tsui <i>et al.</i> , 2014 |

|      |                                                                                                                                       |                  |            |
|------|---------------------------------------------------------------------------------------------------------------------------------------|------------------|------------|
| K208 | D39 $\Delta cps \Delta walk::P_c-[kan-rpsL^+]$ (IU1945 X fusion $\Delta walk::P_c-[kan-rpsL^+]$ )                                     | Kan <sup>R</sup> | This study |
| K372 | D39 $\Delta cps \Delta spd\_0173::P_c-[kan-rpsL^+]$ (IU1945 X fusion $\Delta spd\_0173::P_c-[kan-rpsL^+]$ )                           | Kan <sup>R</sup> | This study |
| K489 | D39 $\Delta cps \Delta spd\_0703::P_c-[kan-rpsL^+]$ (IU1945 X fusion $\Delta spd\_0703::P_c-[kan-rpsL^+]$ )                           | Kan <sup>R</sup> | This study |
| K637 | D39 $\Delta cps \Delta mltG::P_c-[kan-rpsL^+]$ (IU1945 X fusion $\Delta mltG::P_c-[kan-rpsL^+]$ )                                     | Kan <sup>R</sup> | This study |
| K654 | D39 $\Delta cps \Delta rodZ(spdc\_2050)::P_c-[kan-rpsL^+]$ (likely has suppressor) (IU1945 X fusion $\Delta rodZ::P_c-[kan-rpsL^+]$ ) | Kan <sup>R</sup> | This study |

<sup>a</sup>Strains were constructed as described in *Experimental procedures and above*.

<sup>b</sup>Primers used to synthesize fusion amplicons are listed in Table S2. FLAG-tagged (FLAG), c-Myc-tagged (Myc), and HA-tagged (HA) fusions were made to the carboxyl-end of MltG. The amino acid sequences of the FLAG, Myc, and HA epitope tags are DYKDDDDK (Hopp *et al.*, 1988, Wayne *et al.*, 2010), EQKLISEEDL (Evan *et al.*, 1985), and YPYDVPDYA (Wilson *et al.*, 1984), respectively. FLAG<sup>3</sup> indicates three tandem sequences of the FLAG epitope, and L in *mreC-L-FLAG*<sup>3</sup> refers to a 10-amino-acid spacer linker (GSAGSAAGSG) (Waldo *et al.*, 1999; Wayne *et al.*, 2010)). L<sub>1</sub> linker sequence in *gfp-L<sub>1</sub>-mltG* is LEGSG (Fleurie *et al.*, 2014). The DNA template for *gfp* is pUC57-*gfp*(*Sp*) (Martin *et al.*, 2010), which was codon optimized for *S pneumoniae* and contains aa substitution (A206K) to prevent GFP dimerization. L<sub>2</sub>-linker sequence in *ftsZ-L2-mKate2* is KLDIEFLQ (Fleurie *et al.*, 2014). mKate2 is a far red monomeric fluorescent protein with codon optimized for *S. pneumoniae* (Beilharz *et al.*, 2015).

<sup>c</sup>Antibiotic resistance markers: Erm<sup>R</sup>, erythromycin; Kan<sup>R</sup>, kanamycin; Spc<sup>R</sup>, spectinomycin; Str<sup>R</sup>, streptomycin; Cm<sup>R</sup>, chloramphenicol; Tet<sup>R</sup>, tetracycline.

**TABLE S2.** Oligonucleotide primers used in this study (order follows Table S1)

| Primer                                                                           | Sequence (5' to 3')                                                | Template <sup>a</sup> | Amplicon Product                                                 |
|----------------------------------------------------------------------------------|--------------------------------------------------------------------|-----------------------|------------------------------------------------------------------|
| <b>For construction of IU6741 (<math>\Delta pbp1a</math>)</b>                    |                                                                    |                       |                                                                  |
| P234                                                                             | CCCTTGTGTTTCATAGCGAGGATAAGCA                                       | D39                   | 5' upstream fragment with 60 bp of 5' <i>pbp1a</i>               |
| SV022                                                                            | TCAGGGGTTGTATTTGATTGTTGCAAGCTTAAGAAGCTA<br>ATGCTCAGATACTTG         |                       |                                                                  |
| SV023                                                                            | CTGAGCATTAGCTTCTTAAGCTTGCAACAATCAAATACA<br>ACCCCTGATCAA            | D39                   | 60 bp of 3' <i>pbp1a</i> and 3' downstream fragment              |
| P235                                                                             | AGGCAAGCCTGCAACCATGGTCTTGAAA                                       |                       |                                                                  |
| <b>For construction of IU7399 (<i>mltG</i>-HA-<math>P_c</math>-<i>kan</i>)</b>   |                                                                    |                       |                                                                  |
| TT507                                                                            | TCAGCAGGTGGTTACTTTGGTTACCAGTACG                                    | D39                   | 5' <i>mltG</i> <sup>+</sup> flanking fragment                    |
| TT519                                                                            | GGTTAAGCATAATCTGGAACATCATATGGATAGTTTAAT<br>TTGCTGTTGACATGTTTCAGCG  |                       |                                                                  |
| TT520                                                                            | CGCTGAACATGTCAACAGCAAATTAACATATCCATATGA<br>TGTTCCAGATTATGCTTAACC   | IU6929 <sup>b</sup>   | HA- $P_c$ - <i>kan</i>                                           |
| TT517                                                                            | ACATAATTTTAGTTTTGTTTACTAAAACAATTCATCCAGTA<br>AAATATAATTTTTATTTTC   |                       |                                                                  |
| TT518                                                                            | TTACTGGATGAATTGTTTTAGTAAACAACTAAAATTATG<br>TGATACTTCACATAATTTTC    | D39                   | Intergenic between <i>mltG</i> and <i>greA</i> , and <i>greA</i> |
| TT508                                                                            | GAGCAAACCTAGGAACTAGCCGCAGGTTG                                      |                       |                                                                  |
| <b>For construction of IU7403 (<i>mltG</i>-FLAG-<math>P_c</math>-<i>erm</i>)</b> |                                                                    |                       |                                                                  |
| TT507                                                                            | TCAGCAGGTGGTTACTTTGGTTACCAGTACG                                    | D39                   | 5' <i>mltG</i> <sup>+</sup> flanking fragment                    |
| TT509                                                                            | CGGTTATTTATCATCATCATCTTTATAATCGTTTAATTTG<br>CTGTTGACATGTTTCAGCG    |                       |                                                                  |
| TT510                                                                            | TGAACATGTCAACAGCAAATTAACGATTATAAAGATGA<br>TGATGATAAATAACCGGG       | IU6565 <sup>c</sup>   | FLAG- $P_c$ - <i>erm</i>                                         |
| TT511                                                                            | AGTATCACATAATTTTAGTTTTGTTTATTTCTCCCGTTAA<br>ATAATAGATAACTATTAATAA  |                       |                                                                  |
| TT512                                                                            | ATTATTTAACGGGAGGAAATAAACAACAACTAAAATTATGT<br>GATACTTCACATAATTTTCTT | D39                   | Intergenic between <i>mltG</i> and <i>greA</i> , and <i>greA</i> |
| TT508                                                                            | GAGCAAACCTAGGAACTAGCCGCAGGTTG                                      |                       |                                                                  |
| <b>For construction of IU7405 (<i>mltG</i>-Myc-<math>P_c</math>-<i>kan</i>)</b>  |                                                                    |                       |                                                                  |
| TT507                                                                            | TCAGCAGGTGGTTACTTTGGTTACCAGTACG                                    | D39                   | 5' <i>mltG</i> <sup>+</sup> flanking fragment                    |
| TT515                                                                            | GATCTTCTTCAGAAATAAGTTTTTGTTCGTTTAATTTGCT<br>GTTGACATGTTTCAGCG      |                       |                                                                  |
| TT516                                                                            | TGAACATGTCAACAGCAAATTAACGAACAAAACTTAT<br>TTCTGAAGAAGATCTTTAACC     | IU6962 <sup>d</sup>   | Myc- $P_c$ - <i>kan</i>                                          |
| TT517                                                                            | ACATAATTTTAGTTTTGTTTACTAAAACAATTCATCCAGTA<br>AAATATAATTTTTATTTTC   |                       |                                                                  |
| TT518                                                                            | TTACTGGATGAATTGTTTTAGTAAACAACTAAAATTATG<br>TGATACTTCACATAATTTTC    | D39                   | Intergenic between <i>mltG</i> and <i>greA</i> , and <i>greA</i> |
| TT508                                                                            | GAGCAAACCTAGGAACTAGCCGCAGGTTG                                      |                       |                                                                  |



| <b>For construction of IU7614 (<i>ftsZ</i><sup>+</sup>-P<sub>c</sub>-[<i>kan-rpsL</i><sup>+</sup>])</b>                                      |                                                                   |                                                                           |                                                                                         |
|----------------------------------------------------------------------------------------------------------------------------------------------|-------------------------------------------------------------------|---------------------------------------------------------------------------|-----------------------------------------------------------------------------------------|
| TT165                                                                                                                                        | AGTGGTGCCGATATGGTCTTCATCACTGCT                                    | D39                                                                       | <i>ftsZ</i> <sup>+</sup>                                                                |
| TT583                                                                                                                                        | CATTATCCATTAATAAATCAAACGGATCCTATTAACGATTT<br>TTGAAAAATGGAGGTGTATC |                                                                           |                                                                                         |
| Kan <i>rpsL</i><br>forward                                                                                                                   | TAGGATCCGTTTGATTTTTAATGGATAATG                                    | P <sub>c</sub> -[ <i>kan-rpsL</i> <sup>+</sup> ]<br>cassette <sup>e</sup> | P <sub>c</sub> -[ <i>kan-rpsL</i> <sup>+</sup> ]                                        |
| Kan <i>rpsL</i><br>reverse                                                                                                                   | GGGCCCTTTCCCTTATGCTTTTG                                           |                                                                           |                                                                                         |
| TT584                                                                                                                                        | CAAAAGCATAAGGAAAGGGCCCGCCCAATTTCAAA<br>GATGAAGATG                 | D39                                                                       | 60 bp of 3' <i>ftsZ</i> - <i>ylmE</i> <sup>+</sup>                                      |
| TT166                                                                                                                                        | TCATTGGGAGAGCCGGTTCCTGTGAAGAAT                                    |                                                                           |                                                                                         |
| <b>For construction of IU8872 (<math>\Delta</math><i>bgaA</i>::<i>tet</i>-P<sub><i>czcD</i></sub>-RBS<sub><i>mltG</i></sub>-<i>mltG</i>)</b> |                                                                   |                                                                           |                                                                                         |
| TT657                                                                                                                                        | CGCCCCAAGTTCATCACCAATGACATCAAC                                    | pJWV25 <sup>f</sup>                                                       | 5' <i>bgaA</i> ':: <i>tet</i> -P <sub><i>czcD</i></sub>                                 |
| TT681                                                                                                                                        | AGTTTTTCCTCCTTGTTGATAATTTGTTATAATAGATTTA<br>TGAACACCTTGTTCAATATC  |                                                                           | -                                                                                       |
| TT682                                                                                                                                        | ACAAGGTGTTTCATAAATCTATTATAACAAATTATCAACAA<br>GGAGGAAAACTTTTGAGTG  | D39                                                                       | RBS( <sub><i>mltG</i></sub> )- <i>mltG</i>                                              |
| TT679                                                                                                                                        | CAACTGGTTTATGAGAAAGTAAGTTCCTTTAGTTTAATTT<br>GCTGTTGACATGTTTCAGC   |                                                                           |                                                                                         |
| TT680                                                                                                                                        | GAACATGTCAACAGCAAATTAACATAAAGAACTTACTT<br>TCTCATAAACAGTTGCTG      | D39                                                                       | 3' <i>bgaA</i> ' flanking                                                               |
| CS121                                                                                                                                        | GCTTTCTTGAGGCAATTCACCTGGTGC                                       |                                                                           |                                                                                         |
| <b>For construction of IU8873 (<i>mltG</i>(E428Q))</b>                                                                                       |                                                                   |                                                                           |                                                                                         |
| P1348                                                                                                                                        | TCTTCTTGACGCCCTTGAAAGAGGTGGCAGT                                   | D39                                                                       | <i>spd_1347</i> -5' <i>mltG</i><br>fragment with<br><i>mltG</i> (E428Q)(GA<br>A to CAA) |
| TT706                                                                                                                                        | TCTGTCTTGGCACCTTGTTTTTCGACCAAGGAAGCAATG<br>G                      |                                                                           |                                                                                         |
| TT707                                                                                                                                        | CTTGGTGCAAAAACAAGGTGCCAAGACAGAAGATCGTA<br>AG                      | D39                                                                       | 3' <i>mltG</i> fragment<br>with<br><i>mltG</i> (E428Q)(GA<br>A to CAA)- <i>greA</i>     |
| P1349                                                                                                                                        | AGAGCAAACACTAGGAAACTAGCCGCAGGTTG                                  |                                                                           |                                                                                         |
| <b>For construction of IU8910 (<i>mltG</i>(<math>\Delta</math> DUF_1346))</b>                                                                |                                                                   |                                                                           |                                                                                         |
| P1348                                                                                                                                        | TCTTCTTGACGCCCTTGAAAGAGGTGGCAGT                                   | D39                                                                       | 5' upstream<br>fragment with 98<br>bp of 5' <i>mltG</i>                                 |
| TT708                                                                                                                                        | CGTGATGTATCTCTGATGATATCCACTACTTTTTCTAAAT<br>CTCTCAGAATCTGCTCTTT   |                                                                           |                                                                                         |
| TT709                                                                                                                                        | GCAGATTCTGAGAGATTTAGAAAAAGTAGTGGATATCAT<br>CAGAGATACATCACGTCG     | D39                                                                       | 1213 bp of 3'<br><i>mltG</i> and 3'<br>downstream<br>fragment                           |
| P1349                                                                                                                                        | AGAGCAAACACTAGGAAACTAGCCGCAGGTTG                                  |                                                                           |                                                                                         |
| <b>For construction of IU8980 (P<sub>c</sub>-[<i>kan-rpsL</i><sup>+</sup>]-<i>mltG</i><sup>+</sup>)</b>                                      |                                                                   |                                                                           |                                                                                         |
| P1348                                                                                                                                        | TCTTCTTGACGCCCTTGAAAGAGGTGGCAGT                                   | D39                                                                       | <i>spd_1347</i> <sup>+</sup>                                                            |
| TT730                                                                                                                                        | CATTATCCATTAATAAATCAAACGGATCCTATTATTTTTTC<br>ATTTCCAGACCATATCATA  |                                                                           |                                                                                         |
| Kan <i>rpsL</i><br>forward                                                                                                                   | TAGGATCCGTTTGATTTTTAATGGATAATG                                    | P <sub>c</sub> -[ <i>kan-rpsL</i> <sup>+</sup> ]<br>cassette <sup>e</sup> | P <sub>c</sub> -[ <i>kan-rpsL</i> <sup>+</sup> ]                                        |
| Kan <i>rpsL</i><br>reverse                                                                                                                   | GGGCCCTTTCCCTTATGCTTTTG                                           |                                                                           |                                                                                         |

|                                                                                                         |                                                                    |                                                                                |                                                                                                              |
|---------------------------------------------------------------------------------------------------------|--------------------------------------------------------------------|--------------------------------------------------------------------------------|--------------------------------------------------------------------------------------------------------------|
| TT731                                                                                                   | CAAAAGCATAAGGAAAGGGGCCCGTTAGGAAAAGTATC<br>ATAGATTGCTTTTTTTGGACTT   | D39                                                                            | 80 bp upstream<br>of <i>mltG</i> and 5' of<br><i>mltG</i> <sup>+</sup>                                       |
| TT412                                                                                                   | CGACCAAGGAAGCAATGGTCAACAACATCAT                                    |                                                                                |                                                                                                              |
| <b>For construction of IU8982 (<i>mltG</i>(E428A))</b>                                                  |                                                                    |                                                                                |                                                                                                              |
| P1348                                                                                                   | TCTTCTTGCAGCCTTGAAAGAGGTGGCAGT                                     | D39                                                                            | <i>spd</i> _1347 <sup>-</sup> -5'<br><i>mltG</i> fragment<br>with<br><i>mltG</i> (E428A)(GA<br>A to GCA)     |
| TT728                                                                                                   | TCTGTCTTGGCACCTGCTTTTTCGACCAAGGAAGCAAT<br>GG                       |                                                                                |                                                                                                              |
| TT729                                                                                                   | CTTGGTCGAAAAAGCAGGTGCCAAGACAGAAGATCGTA<br>AG                       | D39                                                                            | 3' <i>mltG</i> fragment<br>with<br><i>mltG</i> (E428A)(GA<br>A to GCA)- <i>greA</i>                          |
| P1349                                                                                                   | AGAGCAAACACTAGGAAACTAGCCGCAGGTTG                                   |                                                                                |                                                                                                              |
| <b>For construction of IU8986 (<i>mltG</i><sup>+</sup>-P<sub>c</sub>-[<i>kan-rpsL</i><sup>+</sup>])</b> |                                                                    |                                                                                |                                                                                                              |
| TT415                                                                                                   | AAGCAGAACAAGCAGGTCCAGAAACACCTACG                                   | D39                                                                            | 3' <i>mltG</i>                                                                                               |
| TT726                                                                                                   | CATTATCCATTAATAAATCAAACGGATCCTATTAGTTTAAT<br>TTGCTGTTGACATGTTTCAGC |                                                                                |                                                                                                              |
| Kan <i>rpsL</i><br>forward                                                                              | TAGGATCCGTTTGATTTTTAATGGATAATG                                     | P <sub>c</sub> -[ <i>kan-<br/>rpsL</i> <sup>+</sup> ]<br>cassette <sup>e</sup> | P <sub>c</sub> -[ <i>kan-rpsL</i> <sup>+</sup> ]                                                             |
| Kan <i>rpsL</i><br>reverse                                                                              | GGGCCCTTTCCTTATGCTTTTG                                             |                                                                                |                                                                                                              |
| TT727                                                                                                   | CAAAAGCATAAGGAAAGGGGCCACAACTAAAATTAT<br>GTGATACTTCACATAATTTTCT     | D39                                                                            | Intergenic<br>between <i>mltG</i><br>and <i>greA</i> , and<br><i>greA</i>                                    |
| P1349                                                                                                   | AGAGCAAACACTAGGAAACTAGCCGCAGGTTG                                   |                                                                                |                                                                                                              |
| <b>For construction of IU9041 (<i>mltG</i>(E428Q)-FLAG-P<sub>c</sub>-<i>erm</i>)</b>                    |                                                                    |                                                                                |                                                                                                              |
| P1348                                                                                                   | TCTTCTTGCAGCCTTGAAAGAGGTGGCAGT                                     | D39                                                                            | <i>spd</i> _1347-5' <i>mltG</i><br>fragment with<br><i>mltG</i> (E428Q)(GA<br>A to CAA)                      |
| TT706                                                                                                   | TCTGTCTTGGCACCTTGTTTTTCGACCAAGGAAGCAATG<br>G                       |                                                                                |                                                                                                              |
| TT707                                                                                                   | CTTGGTCGAAAAACAAGGTGCCAAGACAGAAGATCGTA<br>AG                       | IU7403 <sup>g</sup>                                                            | 3' <i>mltG</i> fragment<br>with<br><i>mltG</i> (E428Q)-<br>FLAG-P <sub>c</sub> - <i>erm</i> -<br><i>greA</i> |
| P1349                                                                                                   | AGAGCAAACACTAGGAAACTAGCCGCAGGTTG                                   |                                                                                |                                                                                                              |
| <b>For construction of IU9102 (<math>\Delta</math><i>mltG</i>::P<sub>c</sub>-<i>aad9</i>)</b>           |                                                                    |                                                                                |                                                                                                              |
| P1348                                                                                                   | TCTTCTTGCAGCCTTGAAAGAGGTGGCAGT                                     | E681 <sup>g</sup>                                                              | 5' upstream<br>fragment with 90<br>bp of 5' <i>mltG</i> and<br>P <sub>c</sub>                                |
| TT688                                                                                                   | GTATTCAAATATATCCTCCTCATTTATTATTTTCTTCTCCTC<br>TTTTCTACAGTATTTAAAGA |                                                                                |                                                                                                              |
| TT689                                                                                                   | ACTGTAGAAAAGAGGAAGGAAATAATAATGAGGAGGA<br>TATATTTGAATACATACGAACA    | IU7397 <sup>g</sup>                                                            | <i>aad9</i>                                                                                                  |
| TT690                                                                                                   | TTTAGTACCGTATTATAATTTTTTTAATCTGTTATTTAAAT<br>AGTTTATAGTTAAATTTAC   |                                                                                |                                                                                                              |
| TT691                                                                                                   | CTATTTAAATAACAGATTAATAAATAATAATACGGTACT<br>AAACGTCCAAAAGCATAAAGG   | E681 <sup>g</sup>                                                              | 90 bp of 3' <i>mltG</i><br>and 3'<br>downstream<br>fragment                                                  |
| P1349                                                                                                   | AGAGCAAACACTAGGAAACTAGCCGCAGGTTG                                   |                                                                                |                                                                                                              |

| <b>For construction of IU9148 (<i>ftsZ</i>-L<sub>2</sub>-<i>mKate2</i>)</b>                                                                                      |                                                                    |                                                      |                                                                                                              |
|------------------------------------------------------------------------------------------------------------------------------------------------------------------|--------------------------------------------------------------------|------------------------------------------------------|--------------------------------------------------------------------------------------------------------------|
| TT165                                                                                                                                                            | AGTGGTGCCGATATGGTCTTCATCACTGCT                                     | IU8845 <sup>h</sup>                                  | 3' <i>ftsZ</i> -L <sub>2</sub>                                                                               |
| TT746                                                                                                                                                            | TGTGCATATTTTCCTTGATAAGTTCTGACATCTGCAGGA<br>ACTCGATGTCTAGTTTACG     |                                                      |                                                                                                              |
| TT747                                                                                                                                                            | AAACTAGACATCGAGTTCCTGCAGATGTCAGAACTTATC<br>AAGGAAAATATGCACA        | pKB01_mK<br>ate2 <sup>i</sup>                        | <i>mkate2</i>                                                                                                |
| TT748                                                                                                                                                            | TTAACGGTGTCCCAATTTACTAGGCAAATCAC                                   |                                                      |                                                                                                              |
| TT749                                                                                                                                                            | TTGCCTAGTAAATTGGGACACCGTTAACATTTTCAAAA<br>ATCGTTAAGTAAATGAATGTA    | D39                                                  | 17 bp of 3' <i>ftsZ</i> -<br><i>ylmE</i> <sup>+</sup>                                                        |
| TT166                                                                                                                                                            | TCATTGGGAGAGCCGTTCTGTGAAGAAT                                       |                                                      |                                                                                                              |
| <b>For construction of IU9445 (<i>mltG</i>(E428A)-FLAG-P<sub>c</sub>-<i>erm</i>)</b>                                                                             |                                                                    |                                                      |                                                                                                              |
| P1348                                                                                                                                                            | TCTTCTTGCAGCCTTGAAAGAGGTGGCAGT                                     | D39                                                  | <i>spd_1347</i> -5' <i>mltG</i><br>fragment with<br><i>mltG</i> (E428A)                                      |
| TT728                                                                                                                                                            | TCTGTCTTGGCACCTGCTTTTTTCGACCAAGGAAGCAAT<br>GG                      |                                                      |                                                                                                              |
| TT729                                                                                                                                                            | CTTGGTGCAGAAAAGCAGGTGCCAAGACAGAAGATCGTA<br>AG                      | IU7403 <sup>g</sup>                                  | 3' <i>mltG</i> fragment<br>with<br><i>mltG</i> (E428A)-<br>FLAG-P <sub>c</sub> - <i>erm</i> -<br><i>greA</i> |
| P1349                                                                                                                                                            | AGAGCAAACACTAGGAAACTAGCCGCAGGTTG                                   |                                                      |                                                                                                              |
| <b>For construction of IU9765 (<math>\Delta</math><i>bgaA</i>::<i>tet</i>-P<sub>Zn</sub>-RBS<sub><i>ftsA</i></sub>-<i>rodZ</i>(<i>spd_2050</i>)<sup>+</sup>)</b> |                                                                    |                                                      |                                                                                                              |
| TT657                                                                                                                                                            | CGCCCCAAGTTCATCACCAATGACATCAAC                                     | IU8906 <sup>l</sup>                                  | 5' <i>bgaA</i> :: <i>tet</i> -P <sub><i>czcD</i></sub><br>-RBS <sub><i>ftsA</i></sub>                        |
| TT769                                                                                                                                                            | CCTCTCCAATTGTTTTTTTTCTCATTACATCGCTTCCTCT<br>CTATCTTCCTTGT          |                                                      |                                                                                                              |
| TT770                                                                                                                                                            | GGAAGATAGAGAGGAAGCGATGTAATGAGAAAAAAAC<br>AATTGGAGAGGTTTTAC         | D39                                                  | <i>rodZ</i>                                                                                                  |
| TT771                                                                                                                                                            | ACTGGTTTATGAGAAAGTAAGTTCTTTAATTTTATAGTAA<br>AGGTTACAGTGATTTGTCCA   |                                                      |                                                                                                              |
| TT772                                                                                                                                                            | AAATCACTGTAACCTTTACTAAAAATTAAGAAGACTTACT<br>TTCTCATAAACCAGTTGCTG   | D39                                                  | 3' <i>bgaA</i> ' flanking                                                                                    |
| CS121                                                                                                                                                            | GCTTTCTTGAGGCAATTCATTGGTGC                                         |                                                      |                                                                                                              |
| <b>For construction of IU9895 (<i>mltG</i>(Y488D)-P<sub>c</sub>-<i>erm</i>)</b>                                                                                  |                                                                    |                                                      |                                                                                                              |
| P1348                                                                                                                                                            | TCTTCTTGCAGCCTTGAAAGAGGTGGCAGT                                     | IU7567 <sup>g</sup>                                  | upstream of <i>mltG</i><br>and <i>mltG</i> (Y488D)                                                           |
| TT726                                                                                                                                                            | CATTATCCATTAATAAATCAAACGGATCCTATTAGTTTAAT<br>TTGCTGTTGACATGTTTCAGC |                                                      |                                                                                                              |
| Kan rpsL<br>forward                                                                                                                                              | TAGGATCCGTTTGATTTTTAATGGATAATG                                     | P <sub>c</sub> - <i>erm</i><br>cassette <sup>e</sup> | P <sub>c</sub> - <i>erm</i>                                                                                  |
| Kan rpsL<br>reverse                                                                                                                                              | GGGCCCTTTCTTATGCTTTTG                                              |                                                      |                                                                                                              |
| TT727                                                                                                                                                            | CAAAAGCATAAGGAAAGGGCCACAACTAAAATTAT<br>GTGATACTTCACATAATTTTCT      | D39                                                  | Intergenic<br>between <i>mltG</i><br>and <i>greA</i> , and<br><i>greA</i>                                    |
| P1349                                                                                                                                                            | AGAGCAAACACTAGGAAACTAGCCGCAGGTTG                                   |                                                      |                                                                                                              |
| <b>For construction of IU9931 (<math>\Delta</math><i>rodZ</i>(<i>spd_2050</i>)&lt;&gt;<i>aad9</i>)</b>                                                           |                                                                    |                                                      |                                                                                                              |
| P1384                                                                                                                                                            | GAGGTAAGCGAGAAGTTTCTGAAGCGGATTGC                                   | D39                                                  | 5' upstream<br>fragment                                                                                      |
| TT311                                                                                                                                                            | GTATGTATTCAAATATATCCTCCTCACACTTGTATCCC<br>TTCTTTCTAGTGTCTATTATG    |                                                      |                                                                                                              |

|                                                                                                        |                                                                  |                     |                                                                              |
|--------------------------------------------------------------------------------------------------------|------------------------------------------------------------------|---------------------|------------------------------------------------------------------------------|
| TT312                                                                                                  | GACACTAGAAAGAAGGGATGACAAGTGTGAGGAGGATA<br>TATTTGAATACATACGAACA   | IU7397 <sup>g</sup> | <i>aad9</i>                                                                  |
| TT313                                                                                                  | CTTTTTTCATTCGTTTTTCCTTATAATTTTTTAAATCTGTT<br>ATTTAAATAGTTTATAGTT |                     |                                                                              |
| TT314                                                                                                  | CTATTTAAATAACAGATTAATAAATTATAAGGAAAAACG<br>AATGAAAAAAGAACAAATTC  | D39                 | 3' downstream<br>fragment                                                    |
| P1385                                                                                                  | ACAACACCTGCAATGGCCACACGTTGCTTT                                   |                     |                                                                              |
| <b>For construction of IU10228 (<i>gfp-L<sub>1</sub>-mltG</i>)</b>                                     |                                                                  |                     |                                                                              |
| P1348                                                                                                  | TCTTCTTGCAGCCTTGAAAGAGGTGGCAGT                                   | D39                 | <i>spd_1347</i>                                                              |
| TT854                                                                                                  | TAAACAATTCTTCACCTTTAGAAATCATAAGTTTTTCCTC<br>CTTGTTGATAATCC       |                     |                                                                              |
| TT855                                                                                                  | ATCAACAAGGAGGAAAACTTATGATTTCTAAAGGTGAA<br>GAATTGTTTACAGGTGT      | IU9020 <sup>l</sup> | <i>gfp-L<sub>1</sub></i> with ATG<br>start codon                             |
| TT757                                                                                                  | TCCGGATCCCTCGAGTTTATAACAATTCATCC                                 |                     |                                                                              |
| TT853                                                                                                  | GAATTGTATAAACTCGAGGGATCCGGAAGTGAAAAGTC<br>AAGAGAAGAAGAGAAATTAAGC | D39                 | 5' <i>mltG</i> starting<br>from second<br>codon of <i>mltG</i>               |
| TT412                                                                                                  | CGACCAAGGAAGCAATGGTCAACAATCAT                                    |                     |                                                                              |
| <b>For construction of IU10292 (<math>\Delta</math><i>spd_0104::P<sub>c</sub>-cat</i>)</b>             |                                                                  |                     |                                                                              |
| P108                                                                                                   | ACGAGTGACATTCATCTGGGCGAT                                         | K15 <sup>g</sup>    | 5' upstream<br>fragment with 60<br>bp of 5'<br><i>spd_0104-P<sub>c</sub></i> |
| MB12                                                                                                   | AAATCAATTTTATTAAGTTCATTTATTATTTCTTCCTCT<br>TTTCTACAGTATTTAAAGA   |                     |                                                                              |
| MB11                                                                                                   | TGTAGAAAAGAGGAAGGAAATAATAAATGAACTTTAATA<br>AAATTGATTTAGACAATTGGA | IU3373 <sup>k</sup> | <i>cat</i> ORF                                                               |
| TT869                                                                                                  | GCCCCTTTCTTATGCTTTTGTATAAAAGCCAGTCATT<br>AGGCCTATCTGA            |                     |                                                                              |
| TT870                                                                                                  | AGGCCTAATGACTGGCTTTTATAACAAAAGCATAAGGAA<br>AGGGGCC               | K15 <sup>g</sup>    | 60 bp of 3'<br><i>spd_0104</i> and 3'<br>downstream<br>fragment              |
| P111                                                                                                   | ACCACCTCATCACCCTGTCTGTT                                          |                     |                                                                              |
| <b>For construction of IU10294 (<math>\Delta</math><i>spd_1874::P<sub>c</sub>-cat</i>)</b>             |                                                                  |                     |                                                                              |
| P174                                                                                                   | ATGTGGTGTATCCGCATTGGGACAGGAT                                     | K57 <sup>g</sup>    | 5' upstream<br>fragment with 60<br>bp of 5'<br><i>spd_1874-P<sub>c</sub></i> |
| MB12                                                                                                   | AAATCAATTTTATTAAGTTCATTTATTATTTCTTCCTCT<br>TTTCTACAGTATTTAAAGA   |                     |                                                                              |
| MB11                                                                                                   | TGTAGAAAAGAGGAAGGAAATAATAAATGAACTTTAATA<br>AAATTGATTTAGACAATTGGA | IU3373 <sup>k</sup> | <i>cat</i> ORF                                                               |
| TT869                                                                                                  | GCCCCTTTCTTATGCTTTTGTATAAAAGCCAGTCATT<br>AGGCCTATCTGA            |                     |                                                                              |
| TT870                                                                                                  | AGGCCTAATGACTGGCTTTTATAACAAAAGCATAAGGAA<br>AGGGGCC               | K57 <sup>g</sup>    | 60 bp of 3'<br><i>spd_1874</i> and 3'<br>downstream<br>fragment              |
| P175                                                                                                   | AGCCGTAAGTCGCAGCACCAATCACAAA                                     |                     |                                                                              |
| <b>For construction of IU10320 (<i>mltG</i>(<math>\Delta</math>5bp)-FLAG-<i>P<sub>c</sub>-erm</i>)</b> |                                                                  |                     |                                                                              |
| P1348                                                                                                  | TCTTCTTGCAGCCTTGAAAGAGGTGGCAGT                                   | IU7477 <sup>g</sup> | <i>spd_1347</i> ,<br><i>mltG</i> ( $\Delta$ 5bp)                             |
| TT509                                                                                                  | CGGTTATTTATCATCATCTTTATAATCGTTTAAATTTG<br>CTGTTGACATGTTACAGCG    |                     |                                                                              |

|                                                                                          |                                                                  |                                      |                                                                       |
|------------------------------------------------------------------------------------------|------------------------------------------------------------------|--------------------------------------|-----------------------------------------------------------------------|
| TT510                                                                                    | TGAACATGTCAACAGCAAATTAACGATTATAAAGATGA<br>TGATGATAAATAACCGGG     | IU7403 <sup>9</sup>                  | FLAG-P <sub>c</sub> -erm,<br>and greA                                 |
| P1349                                                                                    | AGAGCAAACCTAGGAAACTAGCCGCAGGTTG                                  |                                      |                                                                       |
| <b>For construction of IU10323 (mltG(Y488D)-FLAG-P<sub>c</sub>-erm)</b>                  |                                                                  |                                      |                                                                       |
| P1348                                                                                    | TCTTCTTGCAGCCTTGAAAGAGGTGGCAGT                                   | IU7567 <sup>9</sup>                  | spd_1347,<br>mltG(Y488D)                                              |
| TT509                                                                                    | CGGTTATTTATCATCATCATCTTTATAATCGTTTAATTTG<br>CTGTTGACATGTTTCAGCG  |                                      |                                                                       |
| TT510                                                                                    | TGAACATGTCAACAGCAAATTAACGATTATAAAGATGA<br>TGATGATAAATAACCGGG     | IU7403 <sup>9</sup>                  | FLAG-P <sub>c</sub> -erm,<br>and greA                                 |
| P1349                                                                                    | AGAGCAAACCTAGGAAACTAGCCGCAGGTTG                                  |                                      |                                                                       |
| <b>For construction of IU10324 (mltG(Δ488bp)-FLAG-P<sub>c</sub>-erm)</b>                 |                                                                  |                                      |                                                                       |
| P1348                                                                                    | TCTTCTTGCAGCCTTGAAAGAGGTGGCAGT                                   | IU7570 <sup>9</sup>                  | spd_1347,<br>mltG(Δ488bp)                                             |
| TT509                                                                                    | CGGTTATTTATCATCATCATCTTTATAATCGTTTAATTTG<br>CTGTTGACATGTTTCAGCG  |                                      |                                                                       |
| TT510                                                                                    | TGAACATGTCAACAGCAAATTAACGATTATAAAGATGA<br>TGATGATAAATAACCGGG     | IU7403 <sup>9</sup>                  | FLAG-P <sub>c</sub> -erm,<br>and greA                                 |
| P1349                                                                                    | AGAGCAAACCTAGGAAACTAGCCGCAGGTTG                                  |                                      |                                                                       |
| <b>For construction of IU10327 (mltG(Ω45bp)<sup>2</sup>-FLAG-P<sub>c</sub>-erm)</b>      |                                                                  |                                      |                                                                       |
| P1348                                                                                    | TCTTCTTGCAGCCTTGAAAGAGGTGGCAGT                                   | IU7765 <sup>9</sup>                  | spd_1347,<br>mltG(Ω45bp) <sup>2</sup>                                 |
| TT509                                                                                    | CGGTTATTTATCATCATCATCTTTATAATCGTTTAATTTG<br>CTGTTGACATGTTTCAGCG  |                                      |                                                                       |
| TT510                                                                                    | TGAACATGTCAACAGCAAATTAACGATTATAAAGATGA<br>TGATGATAAATAACCGGG     | IU7403 <sup>9</sup>                  | FLAG-P <sub>c</sub> -erm,<br>and greA                                 |
| P1349                                                                                    | AGAGCAAACCTAGGAAACTAGCCGCAGGTTG                                  |                                      |                                                                       |
| <b>For construction of IU10919 (mltG<sub>Spn-Eco</sub>-P<sub>c</sub>-erm)</b>            |                                                                  |                                      |                                                                       |
| TT413                                                                                    | GAGCCTGGTGGTTATATCTCTGTGACCTGT                                   | D39                                  | Upstream of <i>S.pn</i><br>mltG and (N) <sub>Spn</sub> -<br>aa(1-209) |
| TT890                                                                                    | GGCAAGATGGCGAACCTTCTGGTAACCAAAGTAACCAC<br>CTGCTG                 |                                      |                                                                       |
| TT891                                                                                    | CAGGTGGTACTTTGGTTACCAGAAGGTTCCGCATCTT<br>GCCGA                   | <i>E. coli</i> K12<br>genomic<br>DNA | aa(25-341)-(C) <sub>Eco</sub>                                         |
| TT892                                                                                    | CATTATCCATTAATAAATCAAACGGATCCTATTACTGCGC<br>ATTTTTTTCCTTAAGCA    |                                      |                                                                       |
| Kan rpsL<br>forward                                                                      | TAGGATCCGTTTGATTTTTAATGGATAATG                                   | IU9895 <sup>9</sup>                  | P <sub>c</sub> -erm-<br>downstream mltG                               |
| P1349                                                                                    | AGAGCAAACCTAGGAAACTAGCCGCAGGTTG                                  |                                      |                                                                       |
| <b>For construction of IU10921 (ΔbgaA::tet-P<sub>czcD</sub>-RBS<sub>rodA</sub>-rodA)</b> |                                                                  |                                      |                                                                       |
| TT657                                                                                    | CGCCCCAAGTTCATCACCAATGACATCAAC                                   | IU8872 <sup>9</sup>                  | 5' bgaA::tet-P <sub>czcD</sub><br>-                                   |
| TT895                                                                                    | TGTAACCTTATACTTTTCATATTGTTATAATAGATTTA<br>TGAACACCTTGTTTCATTATC  |                                      |                                                                       |
| TT896                                                                                    | TGTTCATAAATCTATTATAACAATATGAAAGTATAAGGTT<br>AGTACATATGAAACGTTCTC | D39                                  | RBS <sub>(rodA)</sub> -rodA                                           |
| TT897                                                                                    | AACTGGTTTATGAGAAAGTAAGTTCTTTTATTTAATTTGT<br>TTTAATACAACCTTTTTCCG |                                      |                                                                       |
| TT898                                                                                    | AAAAGGTTGTATTAACAATAAATAAAGAAGTACT<br>TTCTCATAAACCAGTTGCTG       | D39                                  | 3' bgaA' flanking                                                     |

|                                                                                 |                                                                   |                                            |                                                    |
|---------------------------------------------------------------------------------|-------------------------------------------------------------------|--------------------------------------------|----------------------------------------------------|
| CS121                                                                           | GCTTTCTTGAGGCAATTCACCTTGGTGC                                      |                                            |                                                    |
| <b>For construction of IU10943 (<math>\Delta rodA::P_cerm</math>)</b>           |                                                                   |                                            |                                                    |
| P1543                                                                           | CAGGCCGTA CTCTTCTGTCCTCTTTACTTCC                                  | D39                                        | 5' upstream fragment with 81 bp of 5' <i>rodA</i>  |
| P1545                                                                           | CATTATCCATTA AAAATCAAACGGATCCTAAGCCACCAC<br>ACCGATGACCA           |                                            |                                                    |
| Kan rpsL forward                                                                | TAGGATCCGTTTGATTTTTAATGGATAATG                                    | $P_cerm^e$                                 | $P_cerm$                                           |
| Kan rpsL reverse                                                                | GGGCCCTTTCCTTATGCTTTTG                                            |                                            |                                                    |
| P1546                                                                           | CAAAGCATAAGGAAAGGGGCCCTCGATGAGTTACCAG<br>ACTAATCTAGCTGAA          | D39                                        | 87 bp of 3' <i>rodA</i> and 3' downstream fragment |
| P1544                                                                           | CGGGTGTTCAAGCTCTCTGGCTTCATTTTC                                    |                                            |                                                    |
| <b>For construction of IU10945 (<math>\Delta rodA::P_c[kan-rpsL^+]</math>)</b>  |                                                                   |                                            |                                                    |
| P1543                                                                           | CAGGCCGTA CTCTTCTGTCCTCTTTACTTCC                                  | D39                                        | 5' upstream fragment with 81 bp of 5' <i>rodA</i>  |
| P1545                                                                           | CATTATCCATTA AAAATCAAACGGATCCTAAGCCACCAC<br>ACCGATGACCA           |                                            |                                                    |
| Kan rpsL forward                                                                | TAGGATCCGTTTGATTTTTAATGGATAATG                                    | $P_c[kan-rpsL^+]$<br>cassette <sup>e</sup> | $P_c[kan-rpsL^+]$                                  |
| Kan rpsL reverse                                                                | GGGCCCTTTCCTTATGCTTTTG                                            |                                            |                                                    |
| P1546                                                                           | CAAAGCATAAGGAAAGGGGCCCTCGATGAGTTACCAG<br>ACTAATCTAGCTGAA          | D39                                        | 87 bp of 3' <i>rodA</i> and 3' downstream fragment |
| P1544                                                                           | CGGGTGTTCAAGCTCTCTGGCTTCATTTTC                                    |                                            |                                                    |
| <b>For construction of IU11007 and IU11009 (<math>mltG_{Eco}-P_cerm</math>)</b> |                                                                   |                                            |                                                    |
| P1348                                                                           | TCTTCTTG CAGCCTTGAAAGAGGTGGCAGT                                   | D39                                        | Upstream of <i>S.pn mltG</i>                       |
| TT903                                                                           | TAACAAGATTATCAATAACACTTTTTTCATAAGTTTTTCC<br>TCCTTGTTGATAATCCATAA  |                                            |                                                    |
| TT904                                                                           | GGATTATCAACAAGGAGGAAAACTTATGAAAAAGTGT<br>TATTGATAATCTTGTTATTGC    | <i>E. coli</i> K12<br>genomic<br>DNA       | <i>E. coli mltG</i> ORF                            |
| TT892                                                                           | CATTATCCATTA AAAATCAAACGGATCCTATTACTGCGC<br>ATTTTTTTCCTTAAGCA     |                                            |                                                    |
| Kan rpsL forward                                                                | TAGGATCCGTTTGATTTTTAATGGATAATG                                    | IU9895 <sup>g</sup>                        | $P_cerm$ -<br>downstream <i>mltG</i>               |
| P1349                                                                           | AGAGCAA ACTAGGAAACTAGCCGCAGGTTG                                   |                                            |                                                    |
| <b>For construction of E655 (<math>\Delta rodZ(sp d_2050)::P_cerm</math>)</b>   |                                                                   |                                            |                                                    |
| TT329                                                                           | CAACTGATATAGTTGGAAGTGAGGAGTCCATTTCCC                              | D39                                        | 5' upstream fragment with 60 bp of 5' <i>rodZ</i>  |
| P1386                                                                           | CATTATCCATTA AAAATCAAACGGATCCTAACTCAATCC<br>CTGATTGATTCTAGCTAATCG |                                            |                                                    |
| Kan rpsL forward                                                                | TAGGATCCGTTTGATTTTTAATGGATAATG                                    | $P_cerm^e$                                 | $P_cerm$                                           |
| Kan rpsL reverse                                                                | GGGCCCTTTCCTTATGCTTTTG                                            |                                            |                                                    |
| P1387                                                                           | CAAAGCATAAGGAAAGGGCCCGATTTATCGAAATTA<br>ACAGCTCAGACTGG            | D39                                        | 60 bp of 3' <i>rodZ</i> and 3'                     |

|                                                                                 |                                                                  |                                          |                                                        |
|---------------------------------------------------------------------------------|------------------------------------------------------------------|------------------------------------------|--------------------------------------------------------|
| P1385                                                                           | ACAACACCTGCAATGGCCACACGTTGCTTT                                   |                                          | downstream fragment                                    |
| <b>For construction of E681 (<math>\Delta mltG::P_c erm</math>)</b>             |                                                                  |                                          |                                                        |
| P1348                                                                           | TCTTCTTGCAGCCTTGAAAGAGGTGGCAGT                                   | D39                                      | 5' upstream fragment with 90 bp of 5' <i>mltG</i>      |
| P1350                                                                           | CATTATCCATTA AAAATCAAACGGATCCTAACTTCATC<br>ATAGCCTTTTACTTTTTCTAA |                                          |                                                        |
| Kan rpsL forward                                                                | TAGGATCCGTTTGATTTTTAATGGATAATG                                   | $P_c erm^e$                              | $P_c erm$                                              |
| Kan rpsL reverse                                                                | GGGCCCTTTCCCTTATGCTTTTG                                          |                                          |                                                        |
| P1351                                                                           | CAAAAGCATAAGGAAAGGGGCCCGATGTCACAGAAGG<br>CAAGGTCTACTATG          | D39                                      | 90 bp of 3' <i>mltG</i> and 3' downstream fragment     |
| P1349                                                                           | AGAGCAAACCTAGGAACTAGCCGCAGGTTG                                   |                                          |                                                        |
| <b>For construction of K5 (<math>\Delta lytC::P_c-[kan-rpsL^+]</math>)</b>      |                                                                  |                                          |                                                        |
| P13                                                                             | TTTGAGAACTGGCGCCATGAAGG                                          | D39                                      | 5' upstream fragment with 60 bp of 5' <i>lytC</i>      |
| P17                                                                             | CATTATCCATTA AAAATCAAACGGATCCTAGACATGACT<br>AGTTGCCAAGCCTAGTAAAC |                                          |                                                        |
| Kan rpsL forward                                                                | TAGGATCCGTTTGATTTTTAATGGATAATG                                   | $P_c-[kan-rpsL^+]$ cassette <sup>e</sup> | $P_c-[kan-rpsL^+]$                                     |
| Kan rpsL reverse                                                                | GGGCCCTTTCCCTTATGCTTTTG                                          |                                          |                                                        |
| P18                                                                             | CAAAAGCATAAGGAAAGGGGCCACCTCTTCTGAATAC<br>ATGAAAGGAATCCA          | D39                                      | 60 bp of 3' <i>lytC</i> and 3' downstream fragment     |
| P14                                                                             | AAACCAGGTGCTTGCCAAGTTTCG                                         |                                          |                                                        |
| <b>For construction of K15 (<math>\Delta spd_0104::P_c-[kan-rpsL^+]</math>)</b> |                                                                  |                                          |                                                        |
| P108                                                                            | ACGAGTGACATTCATCTGGGCGAT                                         | D39                                      | 5' upstream fragment with 60 bp of 5' <i>spd_0104</i>  |
| P120                                                                            | CATTATCCATTA AAAATCAAACGGATCCTATGCAAACAA<br>GGCAGCTACTCCTG       |                                          |                                                        |
| Kan rpsL forward                                                                | TAGGATCCGTTTGATTTTTAATGGATAATG                                   | $P_c-[kan-rpsL^+]$ cassette <sup>e</sup> | $P_c-[kan-rpsL^+]$                                     |
| Kan rpsL reverse                                                                | GGGCCCTTTCCCTTATGCTTTTG                                          |                                          |                                                        |
| P121                                                                            | CAAAAGCATAAGGAAAGGGGCCCGGACGTTACGGTTC<br>ATGGACTGC               | D39                                      | 60 bp of 3' <i>spd_0104</i> and 3' downstream fragment |
| P111                                                                            | ACCACCTCATCACCCTGTCTGTT                                          |                                          |                                                        |
| <b>For construction of K25 (<math>\Delta dacB::P_c-[kan-rpsL^+]</math>)</b>     |                                                                  |                                          |                                                        |
| P136                                                                            | ACTGCCCATGTAGATACGCTTGGTGCTA                                     | D39                                      | 5' upstream fragment with 60 bp of 5' <i>dacB</i>      |
| P140                                                                            | CATTATCCATTA AAAATCAAACGGATCCTATGAACAAGC<br>TGCTAGACTCAAGGCTAG   |                                          |                                                        |
| Kan rpsL forward                                                                | TAGGATCCGTTTGATTTTTAATGGATAATG                                   | $P_c-[kan-rpsL^+]$ cassette <sup>e</sup> | $P_c-[kan-rpsL^+]$                                     |
| Kan rpsL reverse                                                                | GGGCCCTTTCCCTTATGCTTTTG                                          |                                          |                                                        |
| P141                                                                            | CAAAAGCATAAGGAAAGGGGCCCGAGAGTGGTCTCAG<br>TTTGGAAGAATACTATG       | D39                                      | 60 bp of 3' <i>dacB</i> and 3'                         |

|                                                                                  |                                                                   |                                          |                                                       |
|----------------------------------------------------------------------------------|-------------------------------------------------------------------|------------------------------------------|-------------------------------------------------------|
| P137                                                                             | ACCGTTTGGCAATACCATTGCTCCACGG                                      |                                          | downstream fragment                                   |
| <b>For construction of K35 (<math>\Delta dacA::P_c-[kan-rpsL^+]</math>)</b>      |                                                                   |                                          |                                                       |
| P150                                                                             | AGCCTGCAATATGCAAGCGATCCCTCTT                                      | D39                                      | 5' upstream fragment with 60 bp of 5' <i>dacA</i>     |
| P152                                                                             | CATTATCCATTA AAAATCAAACGGATCCTAAGCAGTAGA<br>AACACCCCCTAAAAGAGAGAC |                                          |                                                       |
| Kan rpsL forward                                                                 | TAGGATCCGTTTGATTTTTAATGGATAATG                                    | $P_c-[kan-rpsL^+]$ cassette <sup>e</sup> | $P_c-[kan-rpsL^+]$                                    |
| Kan rpsL reverse                                                                 | GGGCCCTTTCCTTATGCTTTTG                                            |                                          |                                                       |
| P153                                                                             | CAAAAGCATAAGGAAAGGGGCCCTTCTTCTTAAAAGTTT<br>GGTGAATCAGTTTG         | D39                                      | 60 bp of 3' <i>dacA</i> and 3' downstream fragment    |
| P151                                                                             | TATCGTTGATGAGGGAGCAAGCGTCCACTA                                    |                                          |                                                       |
| <b>For construction of K37 (<math>\Delta pmp23::P_c-[kan-rpsL^+]</math>)</b>     |                                                                   |                                          |                                                       |
| P154                                                                             | AGTTCAGTCCGGATGATACCGAGCTGTT                                      | D39                                      | 5' upstream fragment with 60 bp of 5' <i>pmp23</i>    |
| P156                                                                             | CATTATCCATTA AAAATCAAACGGATCCTATTTATAGCC<br>AGCAAAAAGGAAGACTGCTAG |                                          |                                                       |
| Kan rpsL forward                                                                 | TAGGATCCGTTTGATTTTTAATGGATAATG                                    | $P_c-[kan-rpsL^+]$ cassette <sup>e</sup> | $P_c-[kan-rpsL^+]$                                    |
| Kan rpsL reverse                                                                 | GGGCCCTTTCCTTATGCTTTTG                                            |                                          |                                                       |
| P157                                                                             | CAAAAGCATAAGGAAAGGGCCCGTACGACTTAACCTT<br>TACATCATCAAATGTTTC       | D39                                      | 60 bp of 3' <i>pmp23</i> and 3' downstream fragment   |
| P155                                                                             | ACTGTCGCCAGCTTGTGATACGATGCTT                                      |                                          |                                                       |
| <b>For construction of K43 (<math>\Delta lytA::P_c-[kan-rpsL^+]</math>)</b>      |                                                                   |                                          |                                                       |
| P166                                                                             | CCTTTGCCCTTCTTCCTATGACCGCTAT                                      | D39                                      | 5' upstream fragment with 60 bp of 5' <i>lytA</i>     |
| P168                                                                             | CATTATCCATTA AAAATCAAACGGATCCTAATATGGTTG<br>CACGCCGACTTGAGGC      |                                          |                                                       |
| Kan rpsL forward                                                                 | TAGGATCCGTTTGATTTTTAATGGATAATG                                    | $P_c-[kan-rpsL^+]$ cassette <sup>e</sup> | $P_c-[kan-rpsL^+]$                                    |
| Kan rpsL reverse                                                                 | GGGCCCTTTCCTTATGCTTTTG                                            |                                          |                                                       |
| P169                                                                             | CAAAAGCATAAGGAAAGGGCCCTGGCAGACAGGCC<br>AGAATTCACAGTAGAG           | D39                                      | 60 bp of 3' <i>lytA</i> and 3' downstream fragment    |
| P167                                                                             | CCTCAACCATCCTATACAGTGAAGATGGGA                                    |                                          |                                                       |
| <b>For construction of K57 (<math>\Delta spd\_1874::P_c-[kan-rpsL^+]</math>)</b> |                                                                   |                                          |                                                       |
| P174                                                                             | ATGTGGTGTATCCGCATTGGGACAGGAT                                      | D39                                      | 5' upstream fragment with 60 bp of 5' <i>spd_1874</i> |
| P176                                                                             | CATTATCCATTA AAAATCAAACGGATCCTATGCCAATAC<br>TGGGGCAAATGACAAGGC    |                                          |                                                       |
| Kan rpsL forward                                                                 | TAGGATCCGTTTGATTTTTAATGGATAATG                                    | $P_c-[kan-rpsL^+]$ cassette <sup>e</sup> | $P_c-[kan-rpsL^+]$                                    |
| Kan rpsL reverse                                                                 | GGGCCCTTTCCTTATGCTTTTG                                            |                                          |                                                       |
| P177                                                                             | CAAAAGCATAAGGAAAGGGCCCGTGGTAGTGTGAC<br>AGAAAATCACTATGATCAG        | D39                                      | 60 bp of 3' <i>spd_1874</i> and 3'                    |



|                                                                                                                |                                                                   |                                                                           |                                                     |
|----------------------------------------------------------------------------------------------------------------|-------------------------------------------------------------------|---------------------------------------------------------------------------|-----------------------------------------------------|
| P175                                                                                                           | AGCCGTAAGTCGCAGCACCAATCACAAA                                      |                                                                           | downstream fragment                                 |
| <b>For construction of K75 (<math>\Delta</math><i>pspA</i>::P<sub>c</sub>-[<i>kan-rpsL</i><sup>+</sup>])</b>   |                                                                   |                                                                           |                                                     |
| P70                                                                                                            | ACCGTTCGGCAATTCATGGTGACATGGACA                                    | D39                                                                       | 5' upstream fragment with 60 bp of 5' <i>pspA</i>   |
| P72                                                                                                            | CATTATCCATTA AAAATCAAACGGATCCTAACCAGCCCC<br>TAAGATAGCGACGCTGGC    |                                                                           |                                                     |
| Kan rpsL forward                                                                                               | TAGGATCCGTTTGATTTTTAATGGATAATG                                    | P <sub>c</sub> -[ <i>kan-rpsL</i> <sup>+</sup> ]<br>cassette <sup>e</sup> | P <sub>c</sub> -[ <i>kan-rpsL</i> <sup>+</sup> ]    |
| Kan rpsL reverse                                                                                               | GGGCCCTTTCCTTATGCTTTTG                                            |                                                                           |                                                     |
| P73                                                                                                            | CAAAAGCATAAGGAAAGGGGCCCTTGCAGTCAACACA<br>ACTGTAGATGGCTAT          | D39                                                                       | 60 bp of 3' <i>pspA</i> and 3' downstream fragment  |
| P71                                                                                                            | TCCTTGTTGCACATAACGTCCGGATTTGGC                                    |                                                                           |                                                     |
| <b>For construction of K148 (<math>\Delta</math><i>cbpD</i>::P<sub>c</sub>-[<i>kan-rpsL</i><sup>+</sup>])</b>  |                                                                   |                                                                           |                                                     |
| P202                                                                                                           | TATCTTAGCAGCTCGTCCAGCAGTTGGT                                      | D39                                                                       | 5' upstream fragment with 60 bp of 5' <i>cbpD</i>   |
| P204                                                                                                           | CATTATCCATTA AAAATCAAACGGATCCTATTTAACTGA<br>CATCTTCAAGTAATAACTTGT |                                                                           |                                                     |
| Kan rpsL forward                                                                                               | TAGGATCCGTTTGATTTTTAATGGATAATG                                    | P <sub>c</sub> -[ <i>kan-rpsL</i> <sup>+</sup> ]<br>cassette <sup>e</sup> | P <sub>c</sub> -[ <i>kan-rpsL</i> <sup>+</sup> ]    |
| Kan rpsL reverse                                                                                               | GGGCCCTTTCCTTATGCTTTTG                                            |                                                                           |                                                     |
| P205                                                                                                           | CAAAAGCATAAGGAAAGGGGCCCTTAGCTATTAATACG<br>ACGGTGGATGGCTACAG       | D39                                                                       | 60 bp of 3' <i>cbpD</i> and 3' downstream fragment  |
| P203                                                                                                           | AGCTATGGCAATGGTCGGAATGGTCTGA                                      |                                                                           |                                                     |
| <b>For construction of K164 (<math>\Delta</math><i>pbp1a</i>::P<sub>c</sub>-[<i>kan-rpsL</i><sup>+</sup>])</b> |                                                                   |                                                                           |                                                     |
| P234                                                                                                           | CCCTTGTTTCATAGCGAGGATAAGCA                                        | D39                                                                       | 5' upstream fragment with 60 bp of 5' <i>pbp1a</i>  |
| P236                                                                                                           | CATTATCCATTA AAAATCAAACGGATCCTACAAGCTTAA<br>GAAGCTAATGCTCAGATACTT |                                                                           |                                                     |
| Kan rpsL forward                                                                                               | TAGGATCCGTTTGATTTTTAATGGATAATG                                    | P <sub>c</sub> -[ <i>kan-rpsL</i> <sup>+</sup> ]<br>cassette <sup>e</sup> | P <sub>c</sub> -[ <i>kan-rpsL</i> <sup>+</sup> ]    |
| Kan rpsL reverse                                                                                               | GGGCCCTTTCCTTATGCTTTTG                                            |                                                                           |                                                     |
| P237                                                                                                           | CAAAAGCATAAGGAAAGGGGCCCAACAATCAAATACA<br>ACCCCTGATCAACAAAATC      | D39                                                                       | 60 bp of 3' <i>pbp1a</i> and 3' downstream fragment |
| P235                                                                                                           | AGGCAAGCCTGCAACCATGGTCTTGAAA                                      |                                                                           |                                                     |
| <b>For construction of K166 (<math>\Delta</math><i>pbp2a</i>::P<sub>c</sub>-[<i>kan-rpsL</i><sup>+</sup>])</b> |                                                                   |                                                                           |                                                     |
| P226                                                                                                           | GGTACGACAACGAAATGTCATACACTGCAC                                    | D39                                                                       | 5' upstream fragment with 60 bp of 5' <i>pbp2a</i>  |
| P228                                                                                                           | CATTATCCATTA AAAATCAAACGGATCCTATTCACCTTGT<br>TCTTTTTTAAAAGAGAAAAG |                                                                           |                                                     |
| Kan rpsL forward                                                                                               | TAGGATCCGTTTGATTTTTAATGGATAATG                                    | P <sub>c</sub> -[ <i>kan-rpsL</i> <sup>+</sup> ]<br>cassette <sup>e</sup> | P <sub>c</sub> -[ <i>kan-rpsL</i> <sup>+</sup> ]    |
| Kan rpsL reverse                                                                                               | GGGCCCTTTCCTTATGCTTTTG                                            |                                                                           |                                                     |
| P229                                                                                                           | CAAAAGCATAAGGAAAGGGGCCCGGAAGATTAAGGA<br>AAAGGCTCAAACAATATG        | D39                                                                       | 60 bp of 3' <i>pbp2a</i> and 3'                     |

|                                                                                   |                                                                    |                                             |                                                         |
|-----------------------------------------------------------------------------------|--------------------------------------------------------------------|---------------------------------------------|---------------------------------------------------------|
| P227                                                                              | TCTGTTCCCGTGTGATCCGACAAATCCT                                       |                                             | downstream fragment                                     |
| <b>For construction of K208 (<math>\Delta walk::P_c-[kan-rpsL^+]</math>)</b>      |                                                                    |                                             |                                                         |
| TT163                                                                             | AGCAGTTTGACCTCTTTCATCAGGTTGCGG                                     | D39                                         | 5' upstream fragment with 60 bp of 5' <i>walk</i>       |
| P508                                                                              | CATTATCCATTA AAAATCAAACGGATCCTACAAAATCAG<br>GATAAAGATAAAAATCTCTGGT |                                             |                                                         |
| Kan rpsL forward                                                                  | TAGGATCCGTTTGATTTTTAATGGATAATG                                     | $P_c-[kan-rpsL^+]$<br>cassette <sup>e</sup> | $P_c-[kan-rpsL^+]$                                      |
| Kan rpsL reverse                                                                  | GGGCCCTTTCCTTATGCTTTTG                                             |                                             |                                                         |
| P509                                                                              | CAAAAGCATAAGGAAAGGGGCCCGTACTCCCTTATGAT<br>AAGGATGCAGTGAAA          | D39                                         | 60 bp of 3' <i>walk</i> and 3' downstream fragment      |
| TT164                                                                             | TGTCAATGGTGTGCGGTATCTGGTGAGGT                                      |                                             |                                                         |
| <b>For construction of K372 (<math>\Delta spd\_0173::P_c-[kan-rpsL^+]</math>)</b> |                                                                    |                                             |                                                         |
| P830                                                                              | TATACGGCGCACCAACTCATTGGGCTCATA                                     | D39                                         | 5' upstream fragment with 60 bp of 5' <i>spd\_0173</i>  |
| P832                                                                              | CATTATCCATTA AAAATCAAACGGATCCTAGACAAAATC<br>CTCTCCGATAATGCCA       |                                             |                                                         |
| Kan rpsL forward                                                                  | TAGGATCCGTTTGATTTTTAATGGATAATG                                     | $P_c-[kan-rpsL^+]$<br>cassette <sup>e</sup> | $P_c-[kan-rpsL^+]$                                      |
| Kan rpsL reverse                                                                  | GGGCCCTTTCCTTATGCTTTTG                                             |                                             |                                                         |
| P833                                                                              | CAAAAGCATAAGGAAAGGGGCCCATGCTCATGTAGAT<br>GCACAGGAACA               | D39                                         | 60 bp of 3' <i>spd\_0173</i> and 3' downstream fragment |
| TT831                                                                             | AACGCCCAAGCCTTCTACAGTTACAGGCA                                      |                                             |                                                         |
| <b>For construction of K489 (<math>\Delta spd\_0703::P_c-[kan-rpsL^+]</math>)</b> |                                                                    |                                             |                                                         |
| P1063                                                                             | TTTCCAGCGAGTAAAGCCATGCTCCACCAA                                     | D39                                         | 5' upstream fragment with 60 bp of 5' <i>spd\_0703</i>  |
| P1065                                                                             | CATTATCCATTA AAAATCAAACGGATCCTACTGCTGGTT<br>TAATTCTTCTTGATAGTCTAC  |                                             |                                                         |
| Kan rpsL forward                                                                  | TAGGATCCGTTTGATTTTTAATGGATAATG                                     | $P_c-[kan-rpsL^+]$<br>cassette <sup>e</sup> | $P_c-[kan-rpsL^+]$                                      |
| Kan rpsL reverse                                                                  | GGGCCCTTTCCTTATGCTTTTG                                             |                                             |                                                         |
| P1066                                                                             | CAAAAGCATAAGGAAAGGGGCCCGTTCAACGGTCTATT<br>ATCAAACGAAAACGT          | D39                                         | 39 bp of 3' <i>spd\_0703</i> and 3' downstream fragment |
| P1064                                                                             | CCCTGCTTGAGAGTATGCAGAAGCAACAGT                                     |                                             |                                                         |
| <b>For construction of K637 (<math>\Delta mltG::P_c-[kan-rpsL^+]</math>)</b>      |                                                                    |                                             |                                                         |
| P1348                                                                             | TCTTCTTGACGCTTGAAGAGGTGGCAGT                                       | D39                                         | 5' upstream fragment with 90 bp of 5' <i>mltG</i>       |
| P1350                                                                             | CATTATCCATTA AAAATCAAACGGATCCTAACTTCATC<br>ATAGCCTTTTACTTTTTCTAA   |                                             |                                                         |
| Kan rpsL forward                                                                  | TAGGATCCGTTTGATTTTTAATGGATAATG                                     | $P_c-[kan-rpsL^+]$<br>cassette <sup>e</sup> | $P_c-[kan-rpsL^+]$                                      |
| Kan rpsL reverse                                                                  | GGGCCCTTTCCTTATGCTTTTG                                             |                                             |                                                         |
| P1351                                                                             | CAAAAGCATAAGGAAAGGGGCCCGATGTACAGAAGG<br>CAAGGTCTACTATG             | D39                                         | 90 bp of 3' <i>mltG</i> and 3'                          |

|                                                                                         |                                                               |                                                         |                                                    |
|-----------------------------------------------------------------------------------------|---------------------------------------------------------------|---------------------------------------------------------|----------------------------------------------------|
| P1349                                                                                   | AGAGCAAAGCTAGGAACTAGCCGCAGGTTG                                |                                                         | downstream fragment                                |
| <b>For construction of K654 (<math>\Delta rodZ(spd\_2050)::P_c-[kan-rpsL^+]</math>)</b> |                                                               |                                                         |                                                    |
| TT329                                                                                   | CAACTGATATAGTTGGAAGTGAGGAGTCCATTTCCC                          | D39                                                     | 5' upstream fragment with 60 bp of 5' <i>rodZ</i>  |
| P1386                                                                                   | CATTATCCATTAATAAATCAAACGGATCCTAACTCAATCCCTGATTGATTCTAGCTAATCG |                                                         |                                                    |
| Kan <i>rpsL</i> forward                                                                 | TAGGATCCGTTTGATTTTTAATGGATAATG                                | <i>P_c-[kan-rpsL<sup>+</sup>]</i> cassette <sup>e</sup> | <i>P_c-[kan-rpsL<sup>+</sup>]</i>                  |
| Kan <i>rpsL</i> reverse                                                                 | GGGCCCTTTCTTATGCTTTTG                                         |                                                         |                                                    |
| P1387                                                                                   | CAAAAGCATAAGGAAAGGGGCCCGATTTATCGAAATTAACAGCTCAGACTGG          | D39                                                     | 60 bp of 3' <i>rodZ</i> and 3' downstream fragment |
| P1385                                                                                   | ACAACACCTGCAATGGCCACACGTTGCTTT                                |                                                         |                                                    |

323

|                                  |                                      |         |                                    |
|----------------------------------|--------------------------------------|---------|------------------------------------|
| <b>For transformation assays</b> |                                      |         |                                    |
| P1348                            | TCTTCTTGCAGCCTTGAAAGAGGTGGCAGT       | K637    | $\Delta mltG::P_c-erm$             |
| P1349                            | AGAGCAAAGCTAGGAACTAGCCGCAGGTTG       |         |                                    |
| TT452                            | GGAGGGTTGGCTGTGGGTGGCTACAAGAAC       | IU7397  | $\Delta pbp2b \rightarrow aad9$    |
| TT352                            | TGAAGGACTGGAAAGACCACTGCACCTTCT       |         |                                    |
| P1543                            | CAGGCCGTA CTCTTCTGTCCTCTTTACTTCC     | IU10943 | $\Delta rodA::P_c-erm$             |
| P1544                            | CGGGTGTTC AAGCTCTCTGGCTTCATTTTC      |         |                                    |
| P1543                            | CAGGCCGTA CTCTTCTGTCCTCTTTACTTCC     | IU10945 | $\Delta rodA::P_c-[kan-rpsL^+]$    |
| P1544                            | CGGGTGTTC AAGCTCTCTGGCTTCATTTTC      |         |                                    |
| AL35                             | GGGGGGCAAACCAAGTGATGTC               | IU3897  | $\Delta mreCD \rightarrow P_c-erm$ |
| AL17                             | TGCTCCA ACTTGAGGTGTTGAACC            |         |                                    |
| AL35                             | GGGGGGCAAACCAAGTGATGTC               | IU1751  | $\Delta mreCD \rightarrow aad9$    |
| AL17                             | TGCTCCA ACTTGAGGTGTTGAACC            |         |                                    |
| TT329                            | CAACTGATATAGTTGGAAGTGAGGAGTCCATTTCCC | IU9931  | $\Delta rodZ \rightarrow aad9$     |
| P1385                            | ACAACACCTGCAATGGCCACACGTTGCTTT       |         |                                    |
| TT329                            | CAACTGATATAGTTGGAAGTGAGGAGTCCATTTCCC | E655    | $\Delta rodZ::P_c-erm$             |
| P1385                            | ACAACACCTGCAATGGCCACACGTTGCTTT       |         |                                    |
| TT329                            | CAACTGATATAGTTGGAAGTGAGGAGTCCATTTCCC | K654    | $\Delta rodZ::P_c-[kan-rpsL^+]$    |
| P1385                            | ACAACACCTGCAATGGCCACACGTTGCTTT       |         |                                    |
| P222                             | CGTTCGTGTGGCGCTGCTTCAAATTGTT         | E193    | $\Delta pbp1b::P_c-erm$            |
| P522                             | AACGGCAACCACCAAGGAGAAACCAAGGA        |         |                                    |

324

| Primers used for QRT-PCR |                          |                 |
|--------------------------|--------------------------|-----------------|
|                          |                          | gene            |
| AL031                    | CTGCGACAGCAGATTTGACCACTA | <i>spd_1874</i> |
| AL032                    | TTCCTGAGGAGCTTCTTCTGCAAC |                 |
| AL023                    | GGAGTAGCTGCCTTGTTTGCAGTA | <i>spd_0104</i> |
| AL024                    | CAGGGCCATCGATAACCAACTCTT |                 |
| AL018                    | GTAGTGCTCAAACAAATGGAGCCG | <i>pcsB</i>     |
| AL019                    | GTCAATGCTTGAGCATCATCAGCC |                 |
| KK489                    | AAAGGTCGTGGTGGTAAGGGAATG | <i>gyrA</i>     |
| KK490                    | GCATCTTGATCCAGGCGCATTACT |                 |

<sup>a</sup>Genomic DNA of the indicated *S. pneumoniae* strains was used as templates for PCR reactions, except for P<sub>c</sub>-*erm* and P<sub>c</sub>-[*kan-rpsL*<sup>+</sup>] cassettes.

<sup>b</sup>Genotype of IU6929 is D39  $\Delta$ *cps pbp2x*-HA-P<sub>c</sub>-*kan* (Land *et al.*, 2013).

<sup>c</sup>Genotype of IU6565 is D39  $\Delta$ *cps ftsZ*-FLAG-P<sub>c</sub>-*erm* (Land *et al.*, 2013).

<sup>d</sup>Genotype of IU6962 is D39  $\Delta$ *cps ftsZ*-Myc-P<sub>c</sub>-*kan* (Land *et al.*, 2013).

<sup>e</sup>P<sub>c</sub>-*erm* and P<sub>c</sub>-*kan-rpsL*<sup>+</sup> cassettes are described in (Tsui *et al.*, 2011).

<sup>f</sup>pJWV25 (Eberhardt *et al.*, 2009).

<sup>g</sup>Strain genotypes are listed in Supplemental Table S1.

<sup>h</sup>Genotype of IU8845 is D39  $\Delta$ *cps rpsL1 ftsZ*-L<sub>2</sub>-*gfp* (Winkler lab collection, unpublished), L<sub>2</sub>-linker sequence is KLDIEFLQ (Fleurie *et al.*, 2014).

<sup>i</sup>pKB01\_mKate2 (Beilharz *et al.*, 2015).

<sup>j</sup>Genotype of IU9020 is D39  $\Delta$ *cps rpsL1 gfp*-L<sub>1</sub>-*pbp2x* (Winkler lab collection, unpublished). L<sub>1</sub> linker sequence is LEGSG The DNA template for *gfp* is pUC57-*gfp*(*Sp*) (Martin *et al.*, 2010).

<sup>k</sup>Genotype of IU3373 is D39 *rpsL*<sup>+</sup>-*rpsG*<sup>+</sup>-*cat* (Tsui *et al.*, 2010).

<sup>l</sup>IU8906 is an unpublised strain containing  $\Delta$ *bgaA::tet*-P<sub>Zn</sub> followed by 24 bp upstream of *ftsA* (RBS<sub>*ftsA*</sub>).  $\Delta$ *bgaA::tet*-P<sub>Zn</sub> was obtained from pJWV25 (Eberhardt *et al.*, 2009).

**Table S3.** Structural similarity of the extracellular domain of MltG<sub>Spn</sub> to known protein structures

| Aligned crystalized structure (organism, PDB ID) <sup>a</sup> | 3D alignment coverage (MltG <sub>Spn</sub> residues) <sup>a,b</sup> | Match confidence <sup>c</sup> (%) | RMSD (Å) <sup>d</sup> | Z-score <sup>e</sup> | 2D domain <sup>f</sup>              | Confirmed function                                    |
|---------------------------------------------------------------|---------------------------------------------------------------------|-----------------------------------|-----------------------|----------------------|-------------------------------------|-------------------------------------------------------|
| Lmo14992 ( <i>L. monocytogenes</i> , 4IIW)                    | 222-541                                                             | 100                               | 0.9                   | 38.4                 | YceG-like (aa 87-248, cd08010)      | no                                                    |
| MltG ( <i>E. coli</i> , 2RIF)                                 | 266-547                                                             | 100                               | 3.7                   | 31.4                 | YceG-like (aa 82-327, cd08010)      | Lytic transglycosylase (Yunck <i>et al.</i> 2015)     |
| SleB ( <i>B. anthracis</i> , 4FET)                            | 411-533                                                             | 97.1                              | 1.5                   | 7.6                  | Hydrolase_2 (aa 153-253, pfam07486) | Lytic transglycosylase (Heffron <i>et al.</i> , 2011) |
| SleB ( <i>B. cereus</i> , 4F55)                               | 412-460                                                             | 94.7                              | 3.6                   | 8.1                  | Hydrolase_2 (aa 159-259, pfam07486) | no                                                    |

<sup>a</sup>Results were obtained from Phyre2 (Kelley & Sternberg, 2009) analysis by inputting amino acid sequence of the entire MltG<sub>Spn</sub> and ran on intensive mode. Structures listed are >90% in match confidence.

<sup>b</sup>Amino acid residues of MltG<sub>Spn</sub> aligned by Phyre2 analysis to protein structures in column 1. For Lmo14992, MltG<sub>Eco</sub>, and SleB<sub>Ban</sub>, the alignments cover the entire sequence of the crystalized peptide chains, which are aa 42-349, aa 81-340, and aa 131-253, respectively, of these proteins. In contrast, only 49 residues of MltG<sub>Spn</sub> align with aa 133-181 of the crystalized 123-residue SleB<sub>Bce</sub> peptide.

<sup>c</sup>Confidence scores were obtained from Phyre2 analysis.

<sup>d</sup>RMSD values were determined via PyMOL alignment of the PDB modelling file generated from Phyre2 input of MltG sequence aligning with each homolog of *L.*

358 *monocytogenes*, *E.coli*, and *B. anthracis* using only the residues sequences shown in  
359 column 2. Alignment of the *B. cereus* homolog was obtained with aa 411-533 of MltG<sub>Spn</sub>  
360 and aa 131-253 of the SleB<sub>Bce</sub> peptide.

361 <sup>e</sup>Z-score was determined via input of the MltG PDB modeling file generated from  
362 Phyre2 into the DALI server. Amino acid sequences used for the alignment and  
363 generation of scores are the same as for RMSD.

364 <sup>f</sup>Conserved domains identified by NCBI search  
365 (<http://www.ncbi.nlm.nih.gov/Structure/cdd/wrpsb.cgi>) by inputting the complete amino  
366 acid sequence of each protein listed in column 1. Domain names (YceG-like or  
367 hydrolase\_2) are followed in parenthesis by the residue numbers of each protein and  
368 accession numbers of the domains. Residues 267 to 542 of MltG<sub>Spn</sub> are identified as  
369 YceG-like and cd08010).

370 **TABLE S4.** Genes encoding proteins with known or putative PG lytic domains and WalRK-regulated genes in *S.*  
 371 *pneumoniae* serotype 2 strain D39<sup>a</sup>, observed hydrolase activities in zymogram assays, and phenotypes of deletion  
 372 mutants in a  $\Delta pbp1a \Delta mltG$  background.

| Gene or tag                            | Hydrolase class <sup>b</sup>                                      | MW (kDa) | Missing band in zymogram <sup>c</sup> | Constructed deletion strain in IU7327 ( $\Delta pbp1a \Delta mltG$ ) background <sup>e</sup> | Doubling time of triple deletion strain (min) <sup>f</sup> |
|----------------------------------------|-------------------------------------------------------------------|----------|---------------------------------------|----------------------------------------------------------------------------------------------|------------------------------------------------------------|
|                                        |                                                                   |          |                                       | IU7327                                                                                       | 50.5 ± 5.5 (5)                                             |
| <i>walk</i>                            | None, histidine kinase                                            | 51.7     | ND <sup>d</sup>                       | IU9235                                                                                       | <b>125.5 ± 0.5(2)</b>                                      |
| WalRK <sub>Spn</sub> regulon           |                                                                   |          |                                       |                                                                                              |                                                            |
| <i>pcsB</i>                            | Putative <i>N</i> -acetylmuramoyl-l-alanine amidase/endopeptidase | 41.8     | ND <sup>d</sup>                       | Essential in WT background <sup>g</sup>                                                      |                                                            |
| <i>lytB</i>                            | <i>N</i> -Acetylglucosaminidase                                   | 81.9     | ~80 kDa                               | IU9298                                                                                       | 58.3 ± 15.5 (2)                                            |
| <i>spd_1874</i>                        | Putative <i>N</i> -acetylmuramidase (LysM domain)                 | 40.6     | ND <sup>d</sup>                       | IU9292                                                                                       | 55.3 (1)                                                   |
| <i>spd_0703</i>                        | None (putative SEDS protein)                                      | 11.0     | ND <sup>d</sup>                       | IU9318                                                                                       | 44 (1)                                                     |
| <i>spd_0104</i>                        | None (LysM domain)                                                | 17.8     | ND <sup>d</sup>                       | IU9316                                                                                       | 40.2 (1)                                                   |
| <i>spd_0126 (pspA)</i>                 | None                                                              | 68.6     | ND <sup>d</sup>                       | IU9320                                                                                       | 51.1 ± 5.7 (2)                                             |
| Cell division                          |                                                                   |          |                                       |                                                                                              |                                                            |
| <i>pmp23</i>                           | Putative lytic transglycosylase                                   | 23.0     | ND <sup>d</sup>                       | IU9290                                                                                       | 62.9 ± 10.5 (3)                                            |
| <i>dacA</i>                            | d,d-Carboxypeptidase                                              | 45.2     | ND <sup>d</sup>                       | IU9386                                                                                       | ND <sup>h</sup>                                            |
| <i>dacB (spd_0549)</i>                 | l,d-Carboxypeptidase                                              | 26.0     | ND <sup>d</sup>                       | IU9388                                                                                       | ND <sup>h</sup>                                            |
| Fratricide and autolysis during growth |                                                                   |          |                                       |                                                                                              |                                                            |
| <i>lytA</i>                            | <i>N</i> -Acetylmuramoyl-l-alanine amidase                        | 36.6     | ~36 kDa                               | IU9382                                                                                       | ND <sup>h</sup>                                            |
| <i>cbpD</i>                            | Putative <i>N</i> -acetylmuramoyl-l-alanine amidase/endopeptidase | 50.4     | ND <sup>d</sup>                       | IU9384                                                                                       | 40.4 (1)                                                   |
| <i>lytC</i>                            | <i>N</i> -Acetylmuramidase                                        | 57.4     | ~57 kDa                               | IU9294                                                                                       | 53.1 ± 7.8 (2)                                             |

| Other putative hydrolases that do not affect cell division |                                     |      |                 |        |                 |
|------------------------------------------------------------|-------------------------------------|------|-----------------|--------|-----------------|
| <i>spd_0873</i>                                            | Putative <i>N</i> -acetylmuramidase | 30.1 | ND <sup>d</sup> | IU9296 | 62.3 ± 12.6 (3) |
| <i>spd_0173</i>                                            | Putative l,d-carboxypeptidase       | 38.8 | ND <sup>d</sup> | IU9390 | ND <sup>h</sup> |

<sup>a</sup>Grouping of genes based on (Barendt *et al.*, 2011).

<sup>b</sup>Based on (Layec *et al.*, 2008).

<sup>c</sup>Zymogram assays were performed as described in *Supplemental experimental procedures*. Bands of indicated molecular weights were absent in the single  $\Delta$ *lytA*,  $\Delta$ *lytB* or  $\Delta$ *lytC* mutants when compared to the wild-type parent (See Fig. S8).

<sup>d</sup>ND, not determined

<sup>e</sup>Constructed mutants with deleted gene in column 1 in IU7327 ( $\Delta$ *pbp1a*  $\Delta$ *mltG*) background. Strains IU10292 and IU10294 ( $\Delta$ *pbp1a*  $\Delta$ *mltG*  $\Delta$ *spd\_0104* and *spd\_1874*) deleted for both LysM-domain proteins (Spd\_0104 and Spd\_1874) were also constructed. Only IU9235 ( $\Delta$ *pbp1a*  $\Delta$ *mltG*  $\Delta$ *walkK*) among all the triple mutants showed significantly smaller colony size compared to the parent strain IU7327 after 24h incubation.

<sup>f</sup>Growth curves and doubling time determinations in BHI broth were performed as described in *Experimental procedures*. Most doubling times are the average and SEM of 2 to 5 independent growth experiments, indicated by n. Among the constructed triple mutants tested, only the triple  $\Delta$ *pbp1a*  $\Delta$ *mltG*  $\Delta$ *walkK* mutant grew with a significantly longer doubling time than the  $\Delta$ *pbp1a*  $\Delta$ *mltG* *walkK*<sup>+</sup> parent.



388 <sup>g</sup> Since *pcsB* is essential for pneumococcal growth, it was not feasible to construct a  $\Delta pbp1a \Delta mltG \Delta pcsB$  strain. We  
389 investigated whether controlling expression of the essential *pcsB*<sup>+</sup> gene from a promoter not regulated by the WalRK TCS  
390 would improve the poor growth of the  $\Delta pbp1a \Delta mltG \Delta walk$  mutant. We utilized the construct  $\Delta bgaA':::kant1t2-P_{fcsK^-} pcsB^+$ ,  
391 which expresses *pcsB* from a fucose-controlled promoter (Barendt *et al.*, 2009) to a level similar to the expression from  
392 the native *walk*-dependent promoter. We transformed a  $\Delta walk$  amplicon into IU9330 ( $\Delta pbp1a mltG(\Delta 488bp) P_{fcsK^-} pcsB^+$ )  
393 in the presence or absence of 1 % fucose. We reasoned that if the poor growth of the  $\Delta pbp1a mltG(\Delta 488bp) \Delta walk$  strain  
394 was due solely to the under-expression of *pcsB*, the ectopic expression of *pcsB* from  $P_{fcsK^-} pcsB^+$  in the presence of fucose  
395 would be able to overcome the growth defect. To the contrary, we observed that the transformants grew very poorly under  
396 both inducing and non-inducing conditions. This result indicates that under-expression of *pcsB* alone does not account for  
397 the poor growth of the  $\Delta pbp1a \Delta mltG \Delta walk$  mutant.

398 <sup>h</sup>Growth curves and of doubling time determinations in BHI broth were not determined; but colony sizes of the triple  
399 mutants on TSAII-BA plates were similar to the control strain ( $\Delta pbp1a \Delta mltG \Delta bgaA$ ).

## SUPPLEMENTAL FIGURE LEGENDS

**Fig. S1.** Model of PG biosynthesis in ovococcus bacteria, such as *S. pneumoniae*, and topology of proteins involved in peripheral PG synthesis. (A) Top. Ovococci divide perpendicularly to their long axis (Zapun *et al.*, 2008). Unencapsulated derivatives of serotype 2 strain D39 *S. pneumoniae* form mostly diplococci and chains of two cells, whereas capsulated D39 strains form short chains of 8–10 cells (Barendt *et al.*, 2009). Bottom. Formation of prolate-ellipsoid-shaped bacteria requires two modes of PG synthesis, peripheral (sidewall-like) and septal PG synthesis, that occur in the midcell region of dividing *S. pneumoniae* cells (Tsui *et al.*, 2014, Massidda *et al.*, 2013, Pinho *et al.*, 2013, Sham *et al.*, 2012, Zapun *et al.*, 2008). At the start of a division cycle, components of both peripheral PG synthesis complexes (orange ovals) and septal synthesis complexes (green rectangles) locate to the equators of cells (bottom). Peripheral PG synthesis (light blue; top) occurs between the future equator and septum of dividing cells and may commence before septal synthesis (Massidda *et al.*, 2013, Wheeler *et al.*, 2011, Zapun *et al.*, 2008). At some point, septal PG synthesis (medium blue) commences to divide the cell in two. The complexes that carry out peripheral and septal PG synthesis locate to a large constricting ring throughout the division cycle, with the exception of PBP2x, which moves to the centers of septa in mid-to-late divisional cells (Tsui *et al.*, 2014). The grey Pac-Man symbol corresponds to PG hydrolases that remodel the PG and allow septal separation. Reproduced from (Tsui *et al.*, 2014). (B) Topology of proteins (not drawn to scale) known or speculated to be involved in peripheral PG synthesis in ovococci (Philippe *et al.*, 2014, Massidda *et al.*, 2013). Involvement of MreC, MreD, PBP2b, and PBP1a in peripheral PG synthesis in

423 *Streptococcus pneumoniae* was shown experimentally in previous studies (Philippe *et*  
424 *al.*, 2014, Tsui *et al.*, 2014, Berg *et al.*, 2013, Massidda *et al.*, 2014, Land & Winkler,  
425 2011). This study shows that the MltG endo-LT is in the peripheral PG synthesis  
426 machine, that MreCD and/or RodZ regulate PBP1a (arrows) and/or MltG activity and/or  
427 localization, and that RodA controls activity of PBP2b (arrow), likely by direct interaction  
428 (*Results and Discussion*). Figure is based on Philippe *et al.*, 2014 and Massidda *et al.*,  
429 2013 and work reported in this study.

430 **Fig. S2.** Phenotypes and Western blots of cells expressing epitope-tagged MltG  
431 derivatives. Full genotypes of strains are listed in Table S1. Growth curves and Western  
432 blotting were performed as described in *Experimental procedures and Supplemental*  
433 *experimental procedures*. (A) and (B) Quantitative Western-blot analyses of strains  
434 expressing MltG-FLAG (expected molecular mass = 62 kDa). Equal amounts (12  $\mu$ g for  
435 A, 26.5  $\mu$ g for B) of total proteins from each strain with genotype indicated in the tables  
436 were loaded onto each lane. Chemiluminescent signal intensity of each band was  
437 normalized to the integrated intensity value obtained for IU9043 ( $\Delta$ *pbp1a mltG-FLAG*) in  
438 right panel of A, or B, or IU7403 (*mltG-FLAG*, left panel of A). Relative signal intensities  
439 (average  $\pm$  SEM) were obtained from two independent experiments. (C) Representative  
440 growth curves of IU1945 parent, IU7399 (*mltG-HA*) and IU7405 (*mltG-Myc*). (D and E)  
441 Western-blot analysis of untagged parent strain IU1945 (lane 1), and *mltG-HA* (D,  
442 IU7399, expected molecular mass = 62 kDa), and *mltG-Myc* (E, IU7405, expected  
443 molecular mass = 62 kDa).

444 **Fig. S3.** Domain architecture of YceG-domain proteins in bacteria of various cell  
445 shapes. YceG-domain proteins of ovococci, including streptococci (*S. pneumoniae*, *S*

446 *mitis*, *S. pyogenes*, *S. mutans*, and *S. agalactiae*) and *Lactococcus lactis*, have a similar  
447 domain architecture consisting of an intracellular domain of 150 to 200 aa, a  
448 transmembrane (TM) domain of  $\approx 24$  aa, and the extracellular YceG-like domain. The  
449 intracellular domain of MltG<sub>Spn</sub> (DUF\_1346) has weak aa similarity to an intracellular  
450 Mid-1 related chloride channel (MCLC) domain and to other DUFs (see *Results*). The  
451 intracellular domain of *S. agalactiae* MltG has an DUF different from DUF\_1346. The  
452 intracellular domains of the MltG homologues of other ovoid species are predicted to be  
453 disordered by Phyre2 analysis. Gram-positive rod-shaped bacteria, such as *Bacillus*  
454 *subtilis* and *Listeria monocytogenes*, and Gram-negative rod-shaped bacterium *E. coli*  
455 contain a short (<20 aa) intracellular domain. YceG domain proteins are absent in the  
456 spherical bacterium *Staphylococcus aureus*. M designates membrane region. L  
457 indicates a conserved LysM-like structure with a  $\beta_1\alpha_1\alpha_2\beta_2\alpha_3$  fold that is a putative PG  
458 binding domain. Strains and protein IDs used to generate this figure are: *S. pneumoniae*  
459 D39 (ABJ53954.1), *S. mitis* B6 (YP\_003446601), *S. pyogenes* A20 (YP\_006932381.1),  
460 *S. mutans* NN2025 (YP\_003484312.1), *S. agalactiae* A909 (YP\_330231), *Lactococcus*  
461 *lactis* II1403 (NP\_266791), *Bacillus subtilis* 168 (NP\_390615), and *E. coli* K-12  
462 (NP\_415615.1).

463 **Fig. S4.** Scheme of experimental reconstruction of  $\Delta pbp2b$  suppressor strains in  
464 D39  $\Delta cps rpsL1 pbp1a^+$  background. See Supplemental *experimental procedures* for  
465 details.

466 **Fig. S5.** Summary of stabilities and viabilities of strains containing frame-shift *mltG*  
467 suppressor alleles. Strains containing frameshift *mltG* alleles (*sup2*, *sup4* and *sup5*) are  
468 viable, but not stable in *pbp1a^+* or *pbp1a^+ \Delta pbp2b* genetic backgrounds. The following

469  $\Delta cps\ pbp1a^+$  strains showed non-uniform-sized colonies when streaked from ice stocks  
470 onto TSAII BA plates: IU10342 ( $pbp1a^+ mltG(E428Q)$ ), the original suppressor strains  
471 IU7477, IU7570, and IU7765, and reconstructed suppressor strains IU9777 ( $pbp1a^+$   
472  $mltG(\Delta 5bp)\ \Delta pbp2b$ ), IU9905 ( $pbp1a^+ mltG(\Delta 488bp)\ \Delta pbp2b$ ) and IU9907 ( $pbp1a^+$   
473  $mltG(\Omega 45bp)^2\ \Delta pbp2b$ ). In contrast, strains containing  $\Delta mltG$  or frameshift  $mltG$  alleles  
474 are viable and stable in  $\Delta pbp1a$  mutants (IU7325, IU7327, IU8549, IU8553 and  
475 IU8555), or  $\Delta pbp1a\ \Delta pbp2b$  (IU7931, IU8565, IU8567, and IU8569) mutants (see Table  
476 S1 for constructions and *Results* for additional details).

477 **Fig. S6.** Clustal Omega alignment of the transmembrane and extracellular domains  
478 of MltG<sub>Eco</sub>, MltG<sub>Spn</sub>, and YceG<sub>Lmo</sub> (the MltG homologue in *L. monocytogenes*). Letter  
479 colors indicate the following aa properties: red: small, hydrophobic or aromatic; blue:  
480 acidic; magenta: basic; green: hydroxyl, sulfhydryl, or amine. The MltG<sub>Eco</sub> sequence (gi  
481 accession 687676267) was aligned with MltG<sub>Spn</sub> (gi: 116076234) and YceG<sub>Lmo</sub> (gi:  
482 16803539) using Clustal Omega (Sievers *et al.*, 2011) with default parameters. Symbols  
483 indicate the following: asterisks (\*) single fully conserved aa; colons (:), conservation  
484 between groups with strongly similar properties; periods (.), conservation between  
485 groups with weakly similar properties. The catalytic glutamate (E218 of MltG<sub>Eco</sub> and  
486 E428 of MltG<sub>Spn</sub>) is indicated as E218/E428. Y488 of MltG<sub>Spn</sub>, the aa changed in the  
487  $\Delta pbp2b\ sup3$  strain, aligns with Y274 of MltG<sub>Eco</sub> and is indicated as Y274/Y488.  
488 Secondary structure information diagramed below the alignment was obtained from the  
489 DSSP annotation in the sequence display feature of the PDB file (PDB ID: 4IIW). Start  
490 and end sites mark the protein sequences used in the crystal structure determination of  
491 YceG<sub>Lmo</sub> (aa 26 to 349). See *Results*, *Discussion*, and Table S3 for additional details.

492 **Fig. S7.** (A) Superposition of crystalized region of YceG<sub>Lmo</sub> (red, aa 42 to 349) and  
493 MltG<sub>Spn</sub> (blue, aa 266 to 547) backbones. Two distinct subdomains are in the YceG  
494 domain: the N-terminal/membrane-proximal subdomain contains a LysM-like domain  
495 with a  $\beta_1\alpha_1\alpha_2\beta_2\alpha_3$  fold (inset) that is a putative PG binding site; and the C-terminal  
496 catalytic subdomain with endo-LT activity. (B). Degree of conservation of each residue  
497 in the LysM-like  $\beta_1\alpha_1\alpha_2\beta_2\alpha_3$  subdomain (top line) and in the endo-LT catalytic subdomain  
498 (bottom line), where asterisks mark the catalytic E aa and the Y aa changed in the *sup3*  
499 allele. Color coded box at each residue was determined using the ConSurf server  
500 (Ashkenazy *et al.*, 2010) using amino acid sequences from MltG<sub>Lmo</sub>. The residues within  
501  $\beta_1\alpha_1\alpha_2\beta_2\alpha_3$  folds are mostly conserved. The catalytic E and Y residues are highly  
502 conserved. See *Results, Discussion*, and Table S3 for additional details.

503 **Fig. S8.** Zymogram of membrane extracts from strain IU1945 (wild-type  
504 unencapsulated parent) and isogenic PG hydrolase mutants K43 ( $\Delta$ lytA), K27 ( $\Delta$ lytB),  
505 and K5 ( $\Delta$ lytC). Electrophoresis of membrane extracts was performed in an SDS-12%  
506 polyacrylamide gel containing a lysed-cell preparation of IU1945 (D39  $\Delta$ cps) as PG  
507 substrate. Membrane extracts from the strains and lysed-cell PG substrate were  
508 prepared and subjected to zymography as described in *Supplemental experimental*  
509 *procedures*. Equal amounts of proteins (35  $\mu$ g) were loaded into each lane. Lane  
510 molecular weight (MW) markers (PageRuler prestained protein ladder, Thermo  
511 Scientific) calibrated by the vendor are shown at left. Arrows to the right of the gel  
512 indicate the migration positions of LytA, LytB, and LytC as inferred by absence of bands  
513 in the corresponding deletion mutants. MltG endo-LT activity is expected to overlap the  
514 upper intact LytC band and would be visible in the  $\Delta$ lytC lane.

515 **Fig. S9.** Growth phenotypes and cell morphologies of *mltG*( $\Delta$ DUF\_1346) mutant  
516 strain IU9025 compared to that of its *mltG*<sup>+</sup> parent strain IU1824. Experiments were  
517 carried out as described in *Supplemental experimental procedures*. (A) Slight growth  
518 defect of IU9025 (*mltG*( $\Delta$ DUF\_1346)) compared to IU1824 (*mltG*<sup>+</sup> parent) under high  
519 salt conditions. (B) Marginal difference in sensitivity of IU9025 (*mltG*( $\Delta$ DUF\_1346)) to  
520 penicillin G compared to IU1824 (*mltG*<sup>+</sup> parent). (C) No difference in growth of IU1824  
521 (*mltG*<sup>+</sup>) and IU9025 (*mltG*( $\Delta$ DUF\_1346)) in BHI broth at neutral or low pH conditions.  
522 (D) IU9025 (*mltG*( $\Delta$ DUF\_1346)) and IU1824 (*mltG*<sup>+</sup>) cells have the same length and  
523 width within experimental error.

524 **Fig. S10.** Growth curves of *mltG*<sup>+</sup> parent strain IU1945 (D39  $\Delta$ *cps*) and merodiploid  
525 strain IU9102 ( $\Delta$ *mltG*// $\Delta$ *bgaA*::P<sub>Zn</sub>-*mltG*) in the absence or presence of different  
526 concentrations of the inducer Zn<sup>2+</sup>. IU1945 and IU9102 were grown overnight in BHI  
527 broth containing 0.2 mM ZnCl<sub>2</sub> and 0.02 mM MnSO<sub>4</sub>, centrifuged to remove Zn<sup>2+</sup> and  
528 Mn<sup>2+</sup>, and resuspended to OD<sub>620</sub>  $\approx$ 0.005 in BHI broth containing 0.2 mM ZnCl<sub>2</sub> and 0.02  
529 mM MnSO<sub>4</sub>, 0.1 mM ZnCl<sub>2</sub> and 0.01 mM MnSO<sub>4</sub>, or 0.05 mM ZnCl<sub>2</sub> and 0.005 mM  
530 MnSO<sub>4</sub>, or no Zn<sup>2+</sup> and Mn<sup>2+</sup> (0 mM Zn) as described in *Experimental procedures*. Tenth  
531 the concentration of MnSO<sub>4</sub> was added to prevent effects of zinc toxicity (Jacobsen *et*  
532 *al.*, 2011).

533 **Fig. S11.** Representative growth curves and morphological changes of  $\Delta$ *pbp1a*,  
534  $\Delta$ *pbp1a*  $\Delta$ *mltG* and  $\Delta$ *pbp1a*  $\Delta$ *mltG*  $\Delta$ *pbp2b* strains. Strains IU1824 (1, D39  $\Delta$ *cps* parent),  
535 IU6741 (2,  $\Delta$ *pbp1a*), IU7327 (3,  $\Delta$ *pbp1a*  $\Delta$ *mltG*) and IU7931 (4,  $\Delta$ *pbp1a*  $\Delta$ *mltG*  $\Delta$ *pbp2b*)  
536 were grown overnight in BHI and diluted to OD<sub>620</sub>  $\approx$ 0.003 in BHI to start growth cultures  
537 as described in *Experimental procedures*. (A) Representative growth curves. Doubling

538 times (mean  $\pm$  SEM) for IU1824, IU6741, IU7327 and IU7931 were  $38 \pm 1$  (n=4),  $48 \pm 3$   
539 (n=3),  $46 \pm 4$  (n=2), and  $48 \pm 3$  (n=2) respectively, and were not statistically different  
540 from each other by one-way ANOVA analysis (GraphPad Prism, nonparametric Kruskal-  
541 Wallis test)). (B) Phase-contrast images of strains growing in exponential phase ( $OD_{620}$   
542  $\approx 0.15$ ). Micrographs are at the same magnification (scale bars = 1  $\mu$ m). (C) Box-and-  
543 whisker plots (whiskers, 5 and 95 percentile) of cell lengths, widths, aspect ratios  
544 (length to width ratio) and relative volumes. Fifty or more cells from two independent  
545 experiments were measured as described in *Experimental procedures* for each strain. P  
546 values were obtained by one-way ANOVA analysis (GraphPad Prism, nonparametric  
547 Kruskal-Wallis test). \*\*\* denotes  $p < 0.001$ .

548 **Fig. S12.** (A) Appearance of colonies on TSAII-BA plates of strains IU1690 (D39  
549 *cps*<sup>+</sup>), IU9771 (*cps*<sup>+</sup>  $\Delta$ *mltG*), IU9897 (*cps*<sup>+</sup>  $\Delta$ *mltG*  $\Delta$ *pbp2b*), and IU10021 (*cps*<sup>+</sup>  $\Delta$ *mltG*  
550  $\Delta$ *pbp1a*). Frozen stocks of strains were streaked onto TSAII-BA plates and  
551 photographed after 17 h of incubation at 37°C. (B) Transformation of a  $\Delta$ *cps2E*  
552 amplicon into IU9771 (D39 *cps*<sup>+</sup>  $\Delta$ *mltG*) to obtain an unencapsulated strain results in  
553 accumulations of spontaneous mutations in *pbp1a*. Two isolates (IU9899 and IU10048)  
554 obtained from two independent transformations were sequenced for the *pbp1a* region.  
555 IU9899 contained *pbp1a*( $\Delta$ T@F33) and IU10048 contained *pbp1a*(G559stop  
556 (GGA $\rightarrow$ TGA)) mutations.

557 **Fig. S13.** Larger width of MltG-HA rings compared to FL-V rings detected by 2D and  
558 3D-SIM IFM. Strain IU7399 (*mltG*-HA) was grown in BHI broth and processed for FL-V  
559 staining, IFM, and DAPI labeling as described in *Experimental procedures*. (A)  
560 Representative images of a field of cells stained with FL-V and subjected to 2D IFM to



561 detect MltG-HA localization. (B) Representative 3D-SIM IFM and FL-V images of cells  
562 at division stages 1-4, (C) averaged 2D IFM images and fluorescence intensity traces,  
563 and (D) scatter plots of FL-V labeling width versus MltG width at midcell equators and  
564 septa at division stages 1-4 in (C) were obtained and processed as described for Fig.  
565 10, except FL-V images are colored green. In D, \*\*\* denotes  $p < 0.001$ . Representative  
566 images in (A) and (B), and data in (C) and (D) were obtained from two independent  
567 biological replicates.

568 **Fig. S14.** Representative growth curves and doubling times of mutants containing  
569  $\Delta walk$  or single deletion mutations in known and putative PG hydrolase genes in (A)  
570 wild-type  $pbp1a^+$  strain IU1824, and in (B)  $\Delta pbp1a \Delta mltG$  mutant strain IU7327 (see  
571 Table S1). Doubling times are the averages  $\pm$  SEM from 2 to 5 independent growths for  
572 most strains or from one growth (n=1) in some cases.

573 **Fig. S15.** Induction of WalRK regulon members in strains containing  $mltG(\Delta 488bp)$   
574 or  $mltG(Y488D)$  mutations. RNA preparation and QRT-PCR procedures to determine  
575 relative transcript amounts of  $spd_{1874}$ ,  $spd_{0104}$ , and  $pcsB$  were performed as  
576 described in *Supplemental experimental procedures* for isogenic strains IU1824 (D39  
577  $\Delta cps rpsL1$ , wild-type (WT) parent), IU6741 ( $\Delta pbp1a$ ), IU8553 ( $\Delta pbp1a mltG(\Delta 488bp)$ ),  
578 IU8567 ( $\Delta pbp1a mltG(\Delta 488bp) \Delta pbp2b$ ), IU9760 ( $mltG(Y488D)$ ), and IU9783  
579 ( $mltG(Y488D) \Delta pbp2b$ ). Numbers at top of each bar indicate the average fold changes  
580 of transcript amounts relative to the WT parent based on three independent QRT-PCR  
581 experiments from three independent biological replicates. \*, \*\*, \*\*\* indicate p values  
582  $< 0.05$ ,  $< 0.01$  and  $< 0.001$ , respectively using a one-sample t test to determine if the

583 mean was significantly different from a hypothetical value of 1. See *Results* and  
584 *Discussion* for additional details.

## 585 586 REFERENCES TO SUPPLEMENTAL INFORMATION

- 587 Ashkenazy, H., E. Erez, E. Martz, T. Pupko & N. Ben-Tal, (2010) ConSurf 2010:  
588 calculating evolutionary conservation in sequence and structure of proteins and  
589 nucleic acids. *Nuc Acids Res* **38**: W529-533.
- 590 Barendt, S.M., A.D. Land, L.T. Sham, W.L. Ng, H.C. Tsui, R.J. Arnold & M.E. Winkler,  
591 (2009) Influences of capsule on cell shape and chain formation of wild-type and  
592 *pcsB* mutants of serotype 2 *Streptococcus pneumoniae*. *J Bacteriol* **191**: 3024-  
593 3040.
- 594 Barendt, S.M., L.T. Sham & M.E. Winkler, (2011) Characterization of mutants deficient  
595 in the L,D-carboxypeptidase (DacB) and WalRK (VicRK) regulon, involved in  
596 peptidoglycan maturation of *Streptococcus pneumoniae* serotype 2 strain D39. *J*  
597 *Bacteriol* **193**: 2290-2300.
- 598 Bartual, S.G., D. Straume, G.A. Stamsas, I.G. Munoz, C. Alfonso, M. Martinez-Ripoll,  
599 L.S. Havarstein & J.A. Hermoso, (2014) Structural basis of PcsB-mediated cell  
600 separation in *Streptococcus pneumoniae*. *Nature Comm* **5**: 3842.
- 601 Beilharz, K., R. van Raaphorst, M. Kjos & J.W. Veening, (2015) Red fluorescent  
602 proteins for gene expression and protein localization studies in *Streptococcus*  
603 *pneumoniae* and efficient transformation with Gibson assembled DNA. *App*  
604 *Environl Microbiol*.
- 605 Benjamini, Y. & Y. Hochberg, (1995) Controlling the False Discovery Rate - a Practical  
606 and Powerful Approach to Multiple Testing. *J Roy Stat Soc B Met* **57**: 289-300.
- 607 Berg, K.H., G.A. Stamsas, D. Straume & L.S. Havarstein, (2013) Effects of low PBP2b  
608 levels on cell morphology and peptidoglycan composition in *Streptococcus*  
609 *pneumoniae* R6. *J Bacteriol* **195**: 4342-4354.
- 610 Eberhardt, A., L.J. Wu, J. Errington, W. Vollmer & J.W. Veening, (2009) Cellular  
611 localization of choline-utilization proteins in *Streptococcus pneumoniae* using  
612 novel fluorescent reporter systems. *Molec Microbiol* **74**: 395-408.
- 613 Evan, G.I., G.K. Lewis, G. Ramsay & J.M. Bishop, (1985) Isolation of monoclonal  
614 antibodies specific for human c-myc proto-oncogene product. *Mol Cell Biol* **5**:  
615 3610-3616.
- 616 Fleurie, A., S. Manuse, C. Zhao, N. Campo, C. Cluzel, J.P. Lavergne, C. Freton, C.  
617 Combet, S. Guiral, B. Soufi, B. Macek, E. Kuru, M.S. VanNieuwenhze, Y.V. Brun,  
618 A.M. Di Guilmi, J.P. Claverys, A. Galinier & C. Grangeasse, (2014) Interplay of  
619 the serine/threonine-kinase StkP and the paralogs DivIVA and GpsB in  
620 pneumococcal cell elongation and division. *PLoS Genet* **10**: e1004275.
- 621 Heffron, J.D., N. Sherry & D.L. Popham, (2011) In vitro studies of peptidoglycan binding  
622 and hydrolysis by the *Bacillus anthracis* germination-specific lytic enzyme SleB. *J*  
623 *Bacteriol* **193**: 125-131.

- 624 Hopp, T.P., K.S. Prickett, V.L. Price, R.T. Libby, C.J. March, D.P. Cerretti, D.L. Urdal &  
625 P.J. Conlon, (1988) A short polypeptide marker sequence useful for recombinant  
626 protein identification and purification. *BioTechnol* **6**: 1204-1210.
- 627 Jacobsen, F.E., K.M. Kazmierczak, J.P. Lisher, M.E. Winkler & D.P. Giedroc, (2011)  
628 Interplay between manganese and zinc homeostasis in the human pathogen  
629 *Streptococcus pneumoniae*. *Metallomics* **3**: 38-41.
- 630 Kelley, L.A. & M.J. Sternberg, (2009) Protein structure prediction on the Web: a case  
631 study using the Phyre server. *Nature Prots* **4**: 363-371.
- 632 Kocaoglu, O., H.C. Tsui, M.E. Winkler & E.E. Carlson, (2015) Profiling of beta-Lactam  
633 Selectivity for Penicillin-Binding Proteins in *Streptococcus pneumoniae* D39.  
634 *Antimicrob Agents Chemother* **59**: 3548-3555.
- 635 Land, A.D., H.C. Tsui, O. Kocaoglu, S.A. Vella, S.L. Shaw, S.K. Keen, L.T. Sham, E.E.  
636 Carlson & M.E. Winkler, (2013) Requirement of essential Pbp2x and GpsB for  
637 septal ring closure in *Streptococcus pneumoniae* D39. *Molec Microbiol* **90**: 939-  
638 955.
- 639 Land, A.D. & M.E. Winkler, (2011) The requirement for pneumococcal MreC and MreD  
640 is relieved by inactivation of the gene encoding PBP1a. *J Bacteriol* **193**: 4166-  
641 4179.
- 642 Langmead, B. & S.L. Salzberg, (2012) Fast gapped-read alignment with Bowtie 2.  
643 *Nature Methods* **9**: 357-359.
- 644 Langmead, B., C. Trapnell, M. Pop & S.L. Salzberg, (2009) Ultrafast and memory-  
645 efficient alignment of short DNA sequences to the human genome. *Genome Biol*  
646 **10**: R25.
- 647 Lanie, J.A., W.L. Ng, K.M. Kazmierczak, T.M. Andrzejewski, T.M. Davidsen, K.J.  
648 Wayne, H. Tettelin, J.I. Glass & M.E. Winkler, (2007) Genome sequence of  
649 Avery's virulent serotype 2 strain D39 of *Streptococcus pneumoniae* and  
650 comparison with that of unencapsulated laboratory strain R6. *J Bacteriol* **189**: 38-  
651 51.
- 652 Layec, S., B. Decaris & N. Leblond-Bourget, (2008) Diversity of Firmicutes  
653 peptidoglycan hydrolases and specificities of those involved in daughter cell  
654 separation. *Res Microbiol* **159**: 507-515.
- 655 Li, H., B. Handsaker, A. Wysoker, T. Fennell, J. Ruan, N. Homer, G. Marth, G.  
656 Abecasis, R. Durbin & S. Genome Project Data Processing, (2009) The  
657 sequence alignment/map format and SAMtools. *Bioinform* **25**: 2078-2079.
- 658 Lohse, M., A.M. Bolger, A. Nagel, A.R. Fernie, J.E. Lunn, M. Stitt & B. Usadel, (2012)  
659 RobiNA: a user-friendly, integrated software solution for RNA-Seq-based  
660 transcriptomics. *Nuc Acids Res* **40**: W622-627.
- 661 Love, M.I., W. Huber & S. Anders, (2014) Moderated estimation of fold change and  
662 dispersion for RNA-seq data with DESeq2. *Genome biology* **15**.
- 663 Margulies, M., M. Egholm, W.E. Altman, S. Attiya, J.S. Bader, L.A. Bemben, J. Berka,  
664 M.S. Braverman, Y.J. Chen, Z. Chen, S.B. Dewell, L. Du, J.M. Fierro, X.V.  
665 Gomes, B.C. Godwin, W. He, S. Helgesen, C.H. Ho, G.P. Irzyk, S.C. Jando, M.L.  
666 Alenquer, T.P. Jarvie, K.B. Jirage, J.B. Kim, J.R. Knight, J.R. Lanza, J.H.  
667 Leamon, S.M. Lefkowitz, M. Lei, J. Li, K.L. Lohman, H. Lu, V.B. Makhijani, K.E.  
668 McDade, M.P. McKenna, E.W. Myers, E. Nickerson, J.R. Nobile, R. Plant, B.P.

- 669 Puc, M.T. Ronan, G.T. Roth, G.J. Sarkis, J.F. Simons, J.W. Simpson, M.  
670 Srinivasan, K.R. Tartaro, A. Tomasz, K.A. Vogt, G.A. Volkmer, S.H. Wang, Y.  
671 Wang, M.P. Weiner, P. Yu, R.F. Begley & J.M. Rothberg, (2005) Genome  
672 sequencing in microfabricated high-density picolitre reactors. *Nature* **437**: 376-  
673 380.
- 674 Martin, B., C. Granadel, N. Campo, V. Henard, M. Prudhomme & J.P. Claverys, (2010)  
675 Expression and maintenance of ComD-ComE, the two-component signal-  
676 transduction system that controls competence of *Streptococcus pneumoniae*.  
677 *Molec Microbiol* **75**: 1513-1528.
- 678 Massidda, O., L. Novakova & W. Vollmer, (2013) From models to pathogens: how much  
679 have we learned about *Streptococcus pneumoniae* cell division? *Environ*  
680 *Microbiol*.
- 681 Philippe, J., T. Vernet & A. Zapun, (2014) The elongation of ovococci. *Microb Drug*  
682 *Resist* **20**: 215-221.
- 683 Pinho, M.G., M. Kjos & J.W. Veening, (2013) How to get (a)round: mechanisms  
684 controlling growth and division of coccoid bacteria. *Nat Rev Microbiol* **11**: 601-  
685 614.
- 686 Ramos-Montanez, S., K.M. Kazmierczak, K.L. Hentchel & M.E. Winkler, (2010)  
687 Instability of *ackA* (acetate kinase) mutations and their effects on acetyl  
688 phosphate and ATP amounts in *Streptococcus pneumoniae* D39. *J Bacteriol* **192**:  
689 6390-6400.
- 690 Robinson, M.D., D.J. McCarthy & G.K. Smyth, (2010) edgeR: a Bioconductor package  
691 for differential expression analysis of digital gene expression data. *Bioinform* **26**:  
692 139-140.
- 693 Sham, L.T., H.C. Tsui, A.D. Land, S.M. Barendt & M.E. Winkler, (2012) Recent  
694 advances in pneumococcal peptidoglycan biosynthesis suggest new vaccine and  
695 antimicrobial targets. *Curr Opinion Microbiol* **15**: 194-203.
- 696 Sievers, F., A. Wilm, D. Dineen, T.J. Gibson, K. Karplus, W. Li, R. Lopez, H. McWilliam,  
697 M. Remmert, J. Soding, J.D. Thompson & D.G. Higgins, (2011) Fast, scalable  
698 generation of high-quality protein multiple sequence alignments using Clustal  
699 Omega. *Molec Sys Biol* **7**: 539.
- 700 Thibessard, A., A. Fernandez, B. Gintz, N. Leblond-Bourget & B. Decaris, (2002) Effects  
701 of *rodA* and *pbp2b* disruption on cell morphology and oxidative stress response  
702 of *Streptococcus thermophilus* CNRZ368. *J Bacteriol* **184**: 2821-2826.
- 703 Tsui, H.C., D. Mukherjee, V.A. Ray, L.T. Sham, A.L. Feig & M.E. Winkler, (2010)  
704 Identification and characterization of noncoding small RNAs in *Streptococcus*  
705 *pneumoniae* serotype 2 strain D39. *J Bacteriol* **192**: 264-279.
- 706 Tsui, H.C., S.K. Keen, L.T. Sham, K.J. Wayne & M.E. Winkler, (2011) Dynamic  
707 distribution of the SecA and SecY translocase subunits and septal localization of  
708 the HtrA surface chaperone/protease during *Streptococcus pneumoniae* D39 cell  
709 division. *mBio* **2**: e00202-11.
- 710 Tsui, H.C., M.J. Boersma, S.A. Vella, O. Kocaoglu, E. Kuru, J.K. Peceny, E.E. Carlson,  
711 M.S. VanNieuwenhze, Y.V. Brun, S.L. Shaw & M.E. Winkler, (2014) Pbp2x  
712 localizes separately from Pbp2b and other peptidoglycan synthesis proteins

713 during later stages of cell division of *Streptococcus pneumoniae* D39. *Molec*  
714 *Microbiol* **94**: 21-40.

715 Wayne, K.J., L.T. Sham, H.C. Tsui, A.D. Gutu, S.M. Barendt, S.K. Keen & M.E. Winkler,  
716 (2010) Localization and cellular amounts of the WalRKJ (VicRKX) two-  
717 component regulatory system proteins in serotype 2 *Streptococcus pneumoniae*.  
718 *J Bacteriol* **192**: 4388-4394.

719 Wheeler, R., S. Mesnage, I.G. Boneca, J.K. Hobbs & S.J. Foster, (2011) Super-  
720 resolution microscopy reveals cell wall dynamics and peptidoglycan architecture  
721 in ovococcal bacteria. *Molec Microbiol* **82**: 1096-1109.

722 Wilson, I.A., H.L. Niman, R.A. Houghten, A.R. Cherenon, M.L. Connolly & R.A. Lerner,  
723 (1984) The structure of an antigenic determinant in a protein. *Cell* **37**: 767-778.

724 Yunck, R., H. Cho & T.G. Bernhardt, (2015) Identification of MltG as a potential  
725 terminase for peptidoglycan polymerization in bacteria. *Molec Microbio* doi:  
726 10.1111/mmi.13258.

727 Zapun, A., T. Vernet & M.G. Pinho, (2008) The different shapes of cocci. *FEMS Microb*  
728 *Rev* **32**: 345-360.

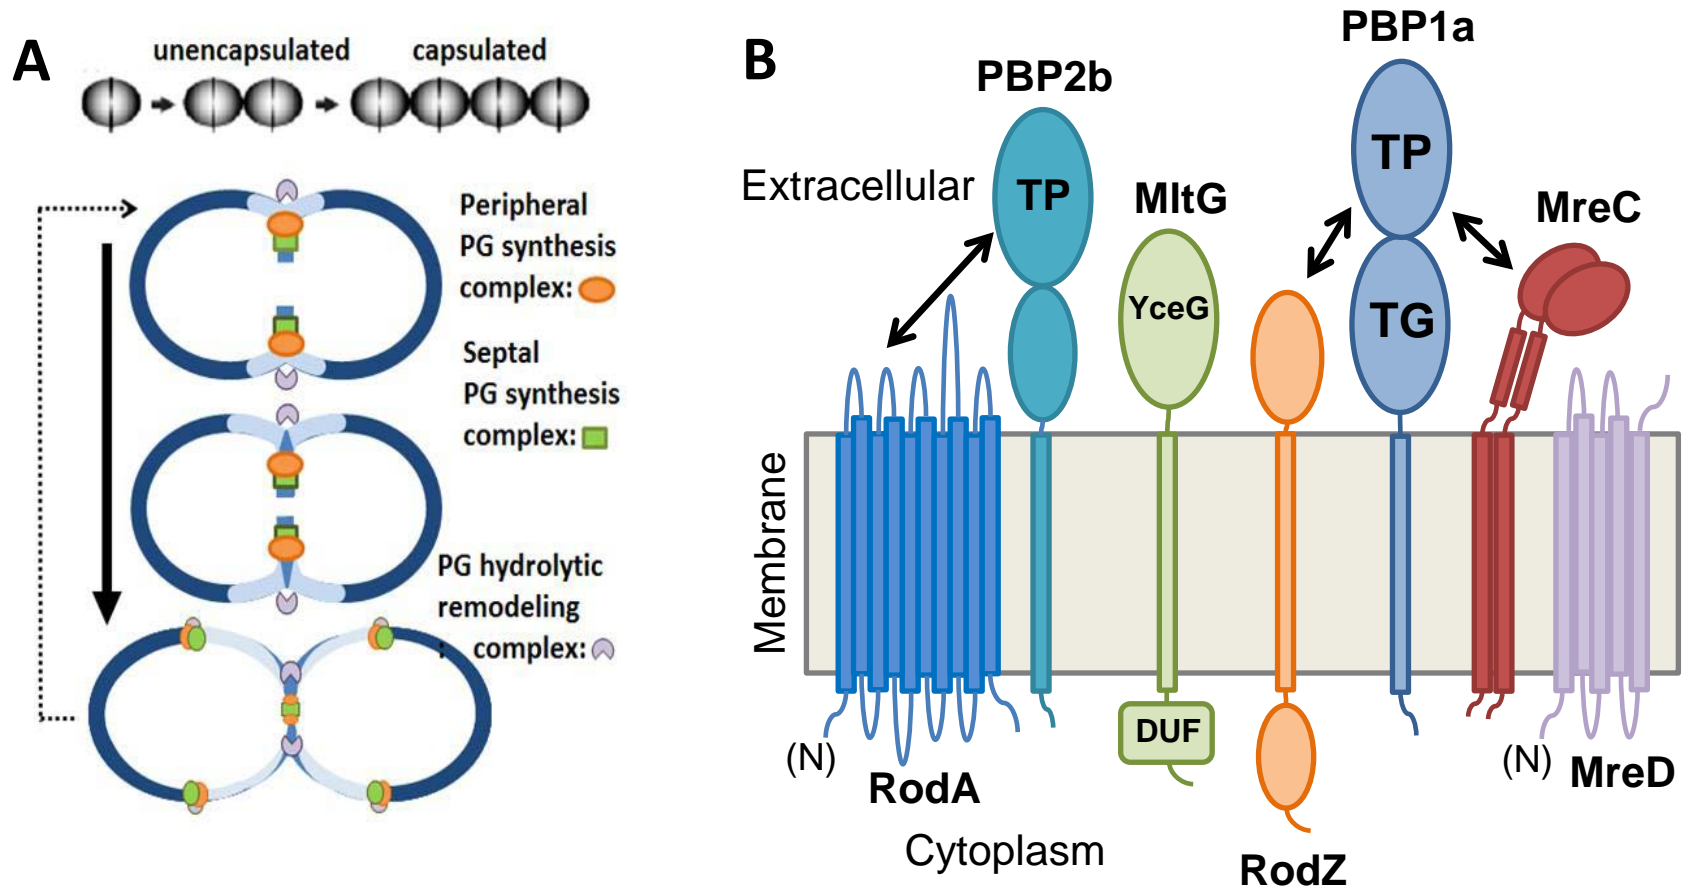

Fig. S1

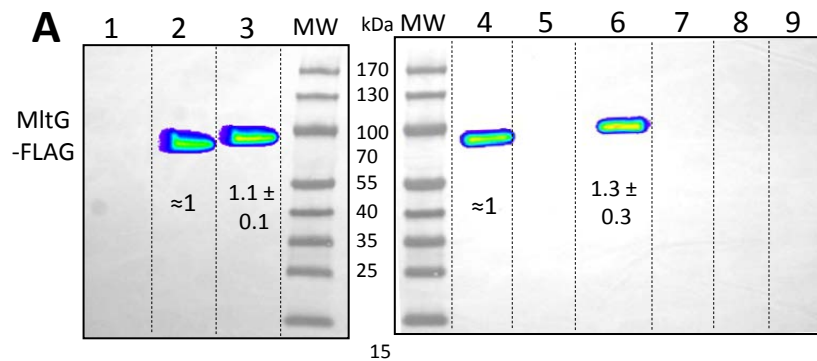

| Lane | Strain # | Genotype                                           |
|------|----------|----------------------------------------------------|
| 1    | IU1945   | WT = D39 $\Delta cps$                              |
| 2    | IU7403   | <i>mltG</i> -FLAG                                  |
| 3    | IU10369  | <i>mltG</i> (Y488D)-FLAG                           |
| 4    | IU9043   | $\Delta pbb1a$ <i>mltG</i> -FLAG                   |
| 5    | IU10320  | $\Delta pbb1a$ <i>mltG</i> ( $\Delta 5bp$ )-FLAG   |
| 6    | IU10323  | $\Delta pbb1a$ <i>mltG</i> (Y488D)-FLAG            |
| 7    | IU10324  | $\Delta pbb1a$ <i>mltG</i> ( $\Delta 488bp$ )-FLAG |
| 8    | IU10327  | $\Delta pbb1a$ <i>mltG</i> ( $\Omega 45bp$ )-FLAG  |
| 9    | IU6741   | $\Delta pbb1a$                                     |

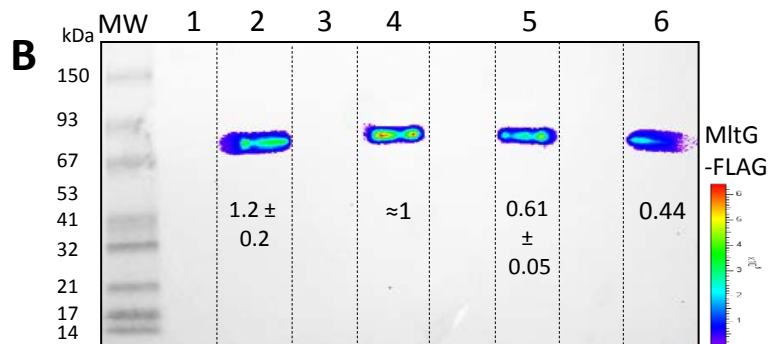

| Lane | Strain # | Genotype                                |
|------|----------|-----------------------------------------|
| 1    | IU1945   | WT = D39 $\Delta cps$                   |
| 2    | IU7403   | <i>mltG</i> -FLAG                       |
| 3    | IU6741   | $\Delta pbb1a$                          |
| 4    | IU9043   | $\Delta pbb1a$ <i>mltG</i> -FLAG        |
| 5    | IU9041   | $\Delta pbb1a$ <i>mltG</i> (E428Q)-FLAG |
| 6    | IU9445   | $\Delta pbb1a$ <i>mltG</i> (E428A)-FLAG |

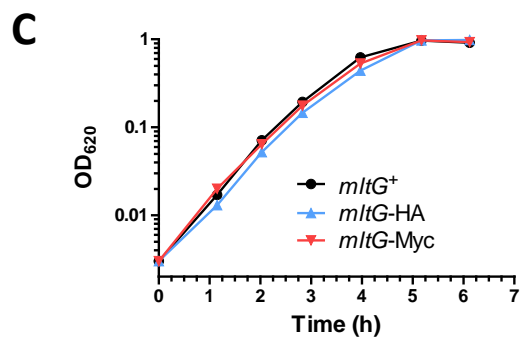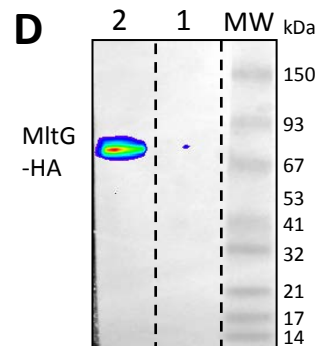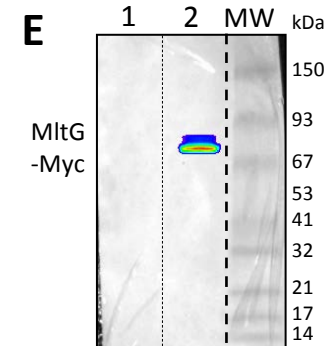

**Fig. S2**

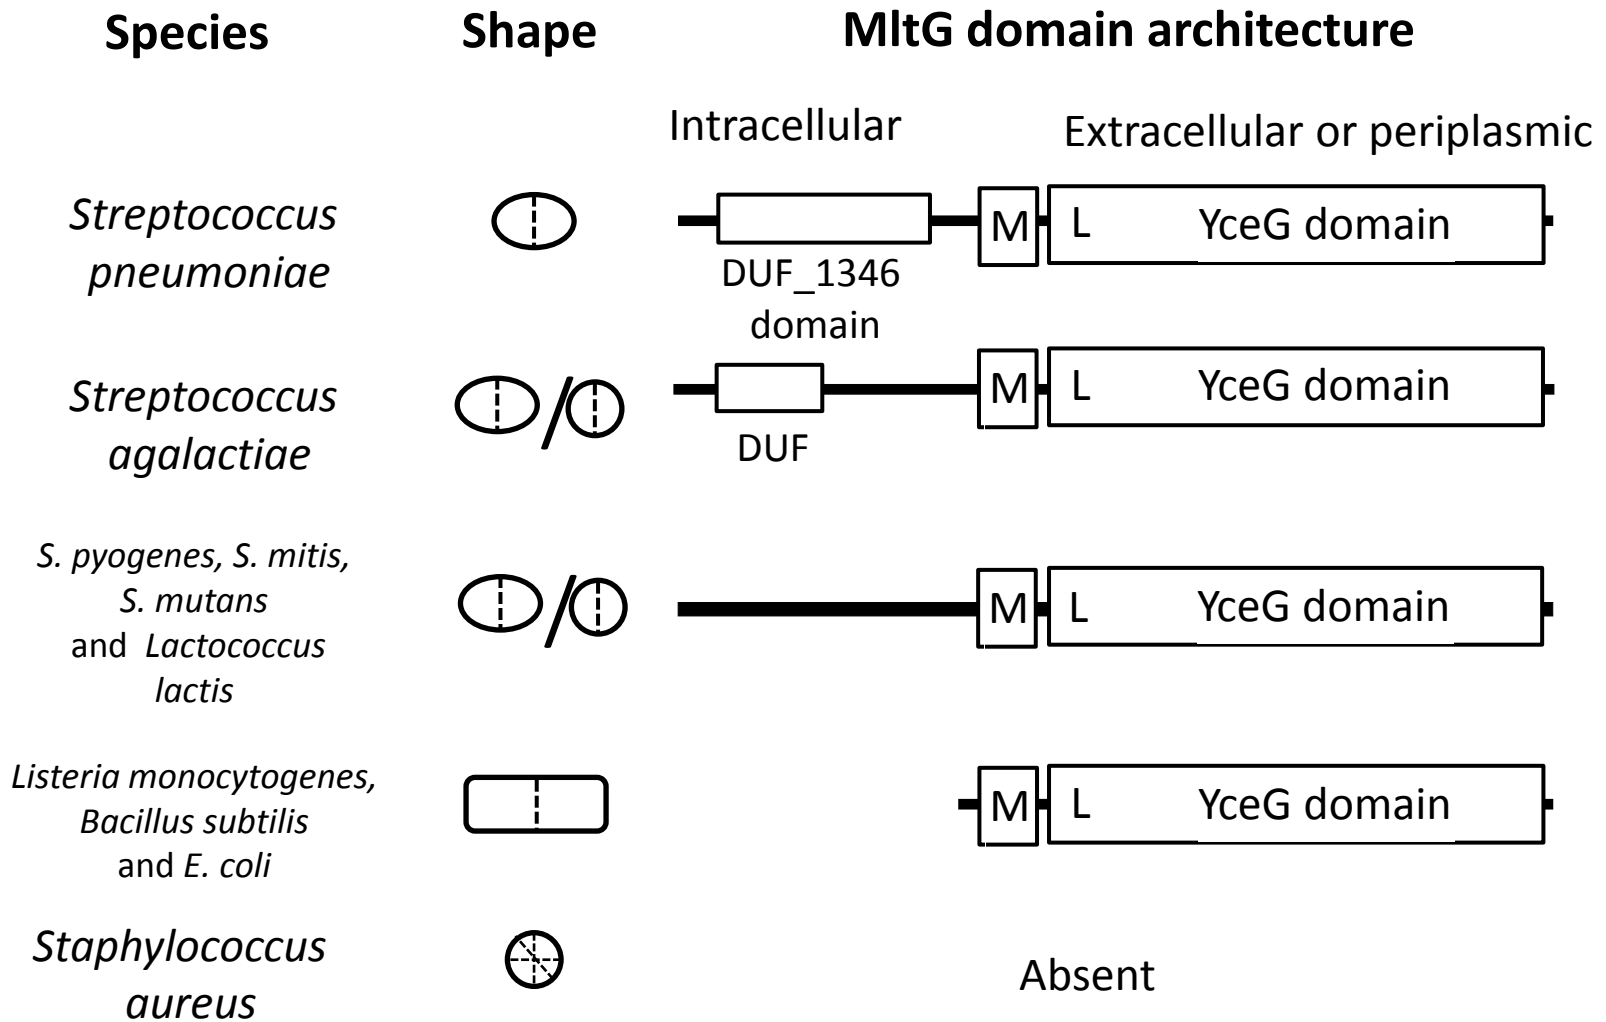

**Fig. S3**





Viable, but not stable (picks up suppressors):

*mltG(E428Q) pbp1a<sup>+</sup>*

[*mltG*( $\Delta$ 5bp), *mltG*( $\Delta$ 488bp), or *mltG*( $\Omega$ 45bp)<sup>2</sup>]  $\Delta$ *pbp2b*

Viable and stable:

$\Delta$ *mltG*  $\Delta$ *pbp1a*

[*mltG*( $\Delta$ 5bp), *mltG*( $\Delta$ 488bp), or *mltG*( $\Omega$ 45bp)<sup>2</sup>]  $\Delta$ *pbp1a*

$\Delta$ *mltG*  $\Delta$ *pbp1a*  $\Delta$ *pbp2b*

*mltG*( $\Delta$ 5bp)  $\Delta$ *pbp1a*  $\Delta$ *pbp2b*

*mltG*( $\Delta$ 488bp)  $\Delta$ *pbp1a*  $\Delta$ *pbp2b*

*mltG*( $\Omega$ 45bp)<sup>2</sup>  $\Delta$ *pbp1a*  $\Delta$ *pbp2b*

*sup2* = *mltG*( $\Delta$ 5bp)

*sup4* = *mltG*( $\Delta$ 488bp)

*sup5* = *mltG*( $\Omega$ 45bp)<sup>2</sup>



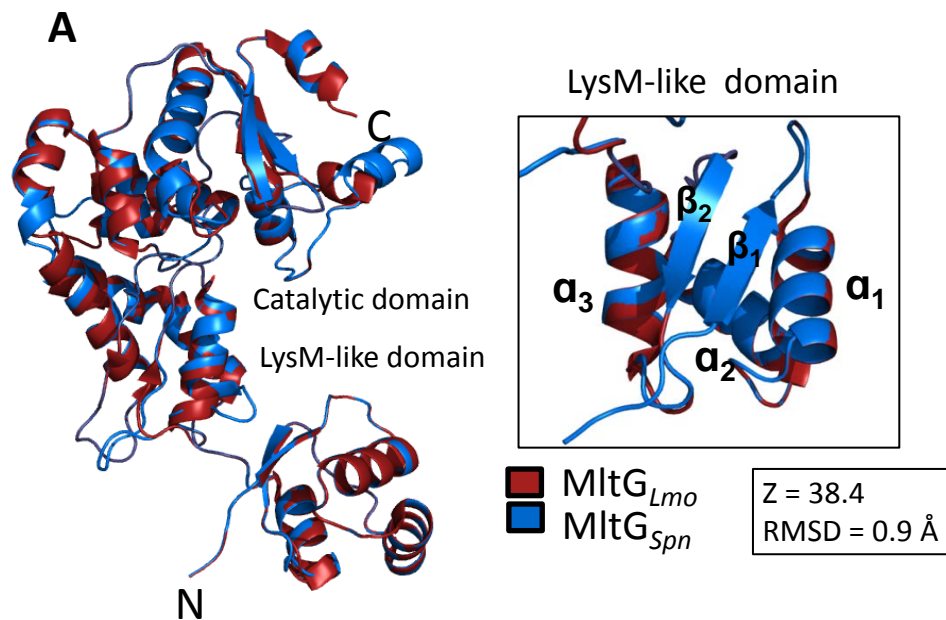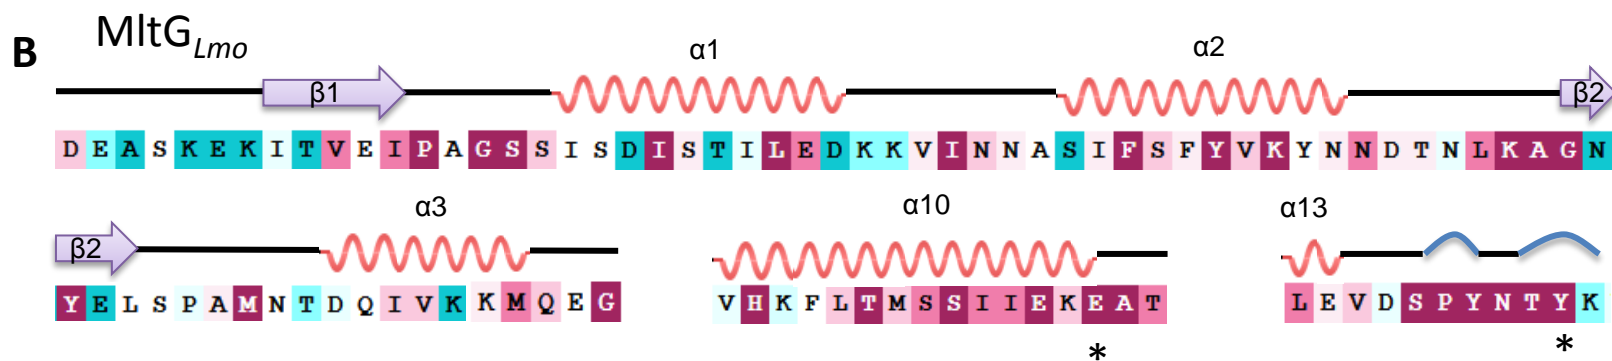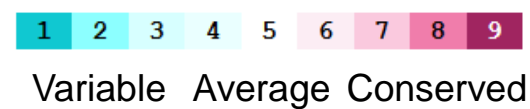

**Fig. S7**

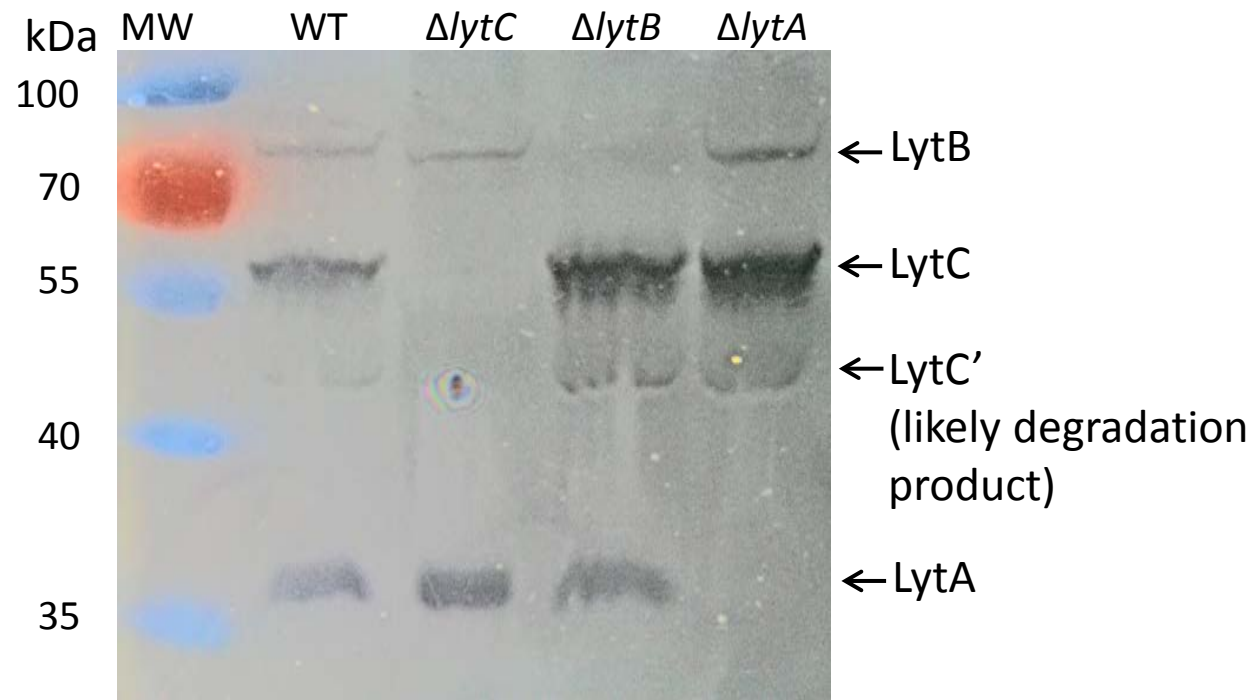

**Fig. S8**

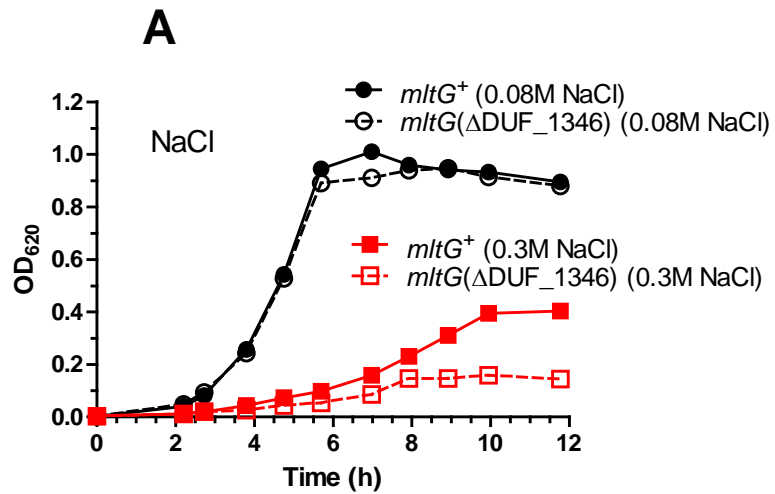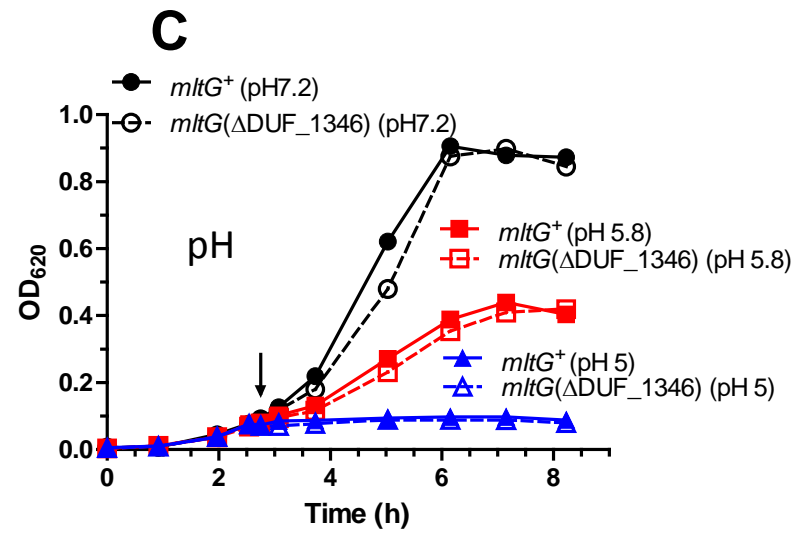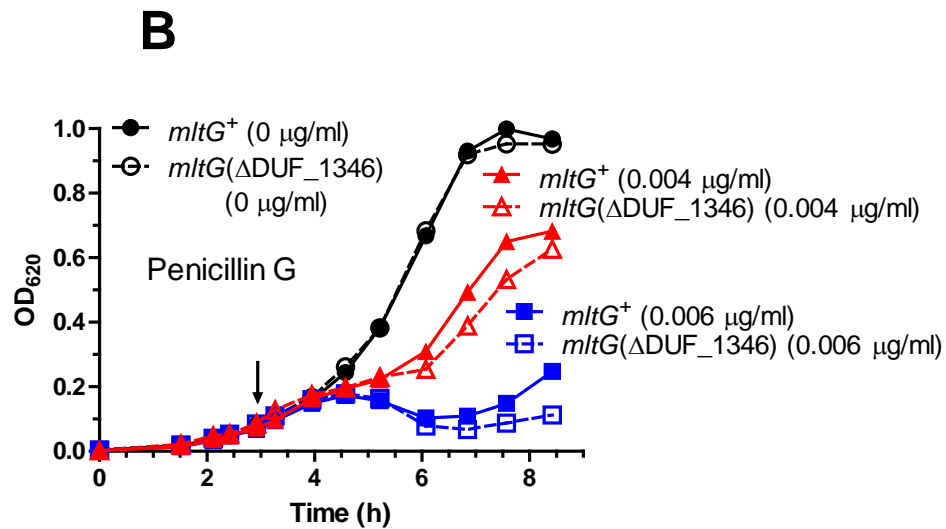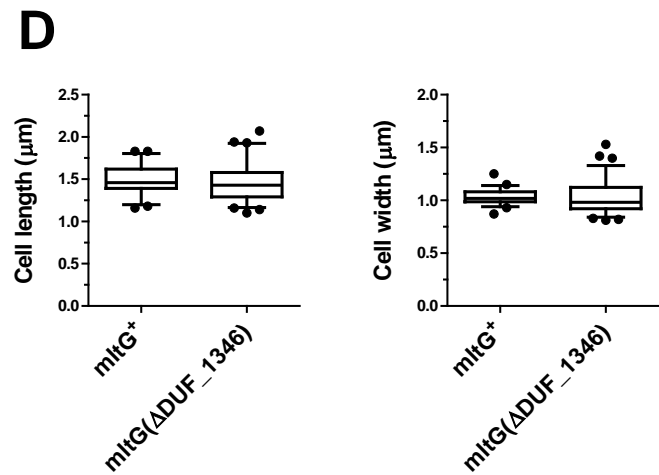

**Fig. S9**

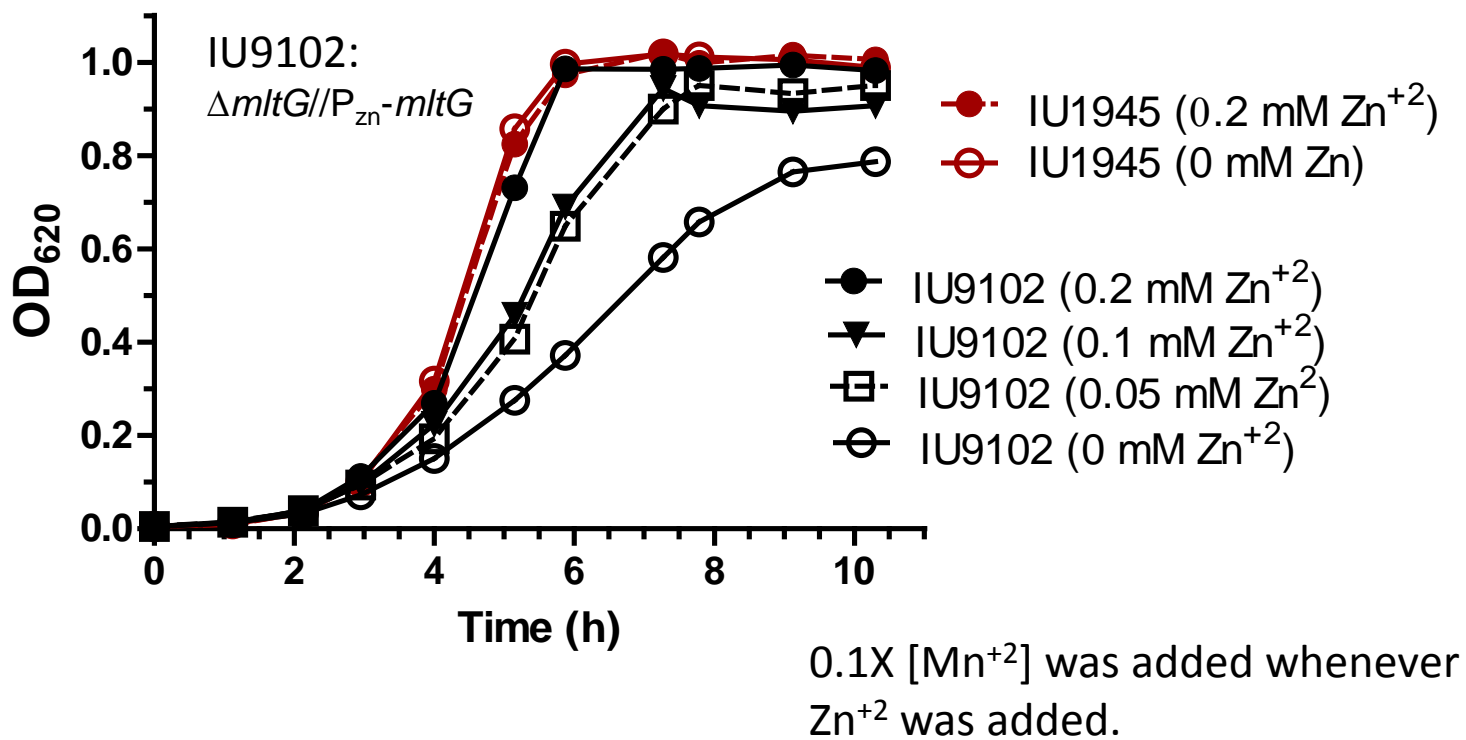

Fig. S10





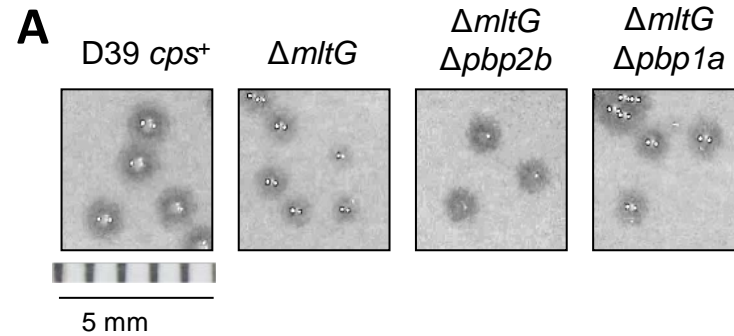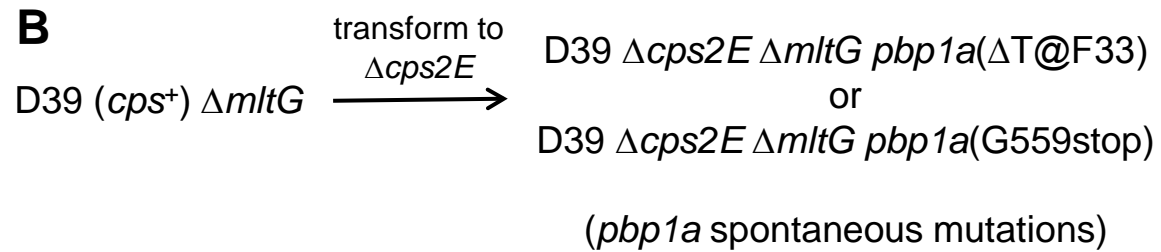

**Fig. S12**

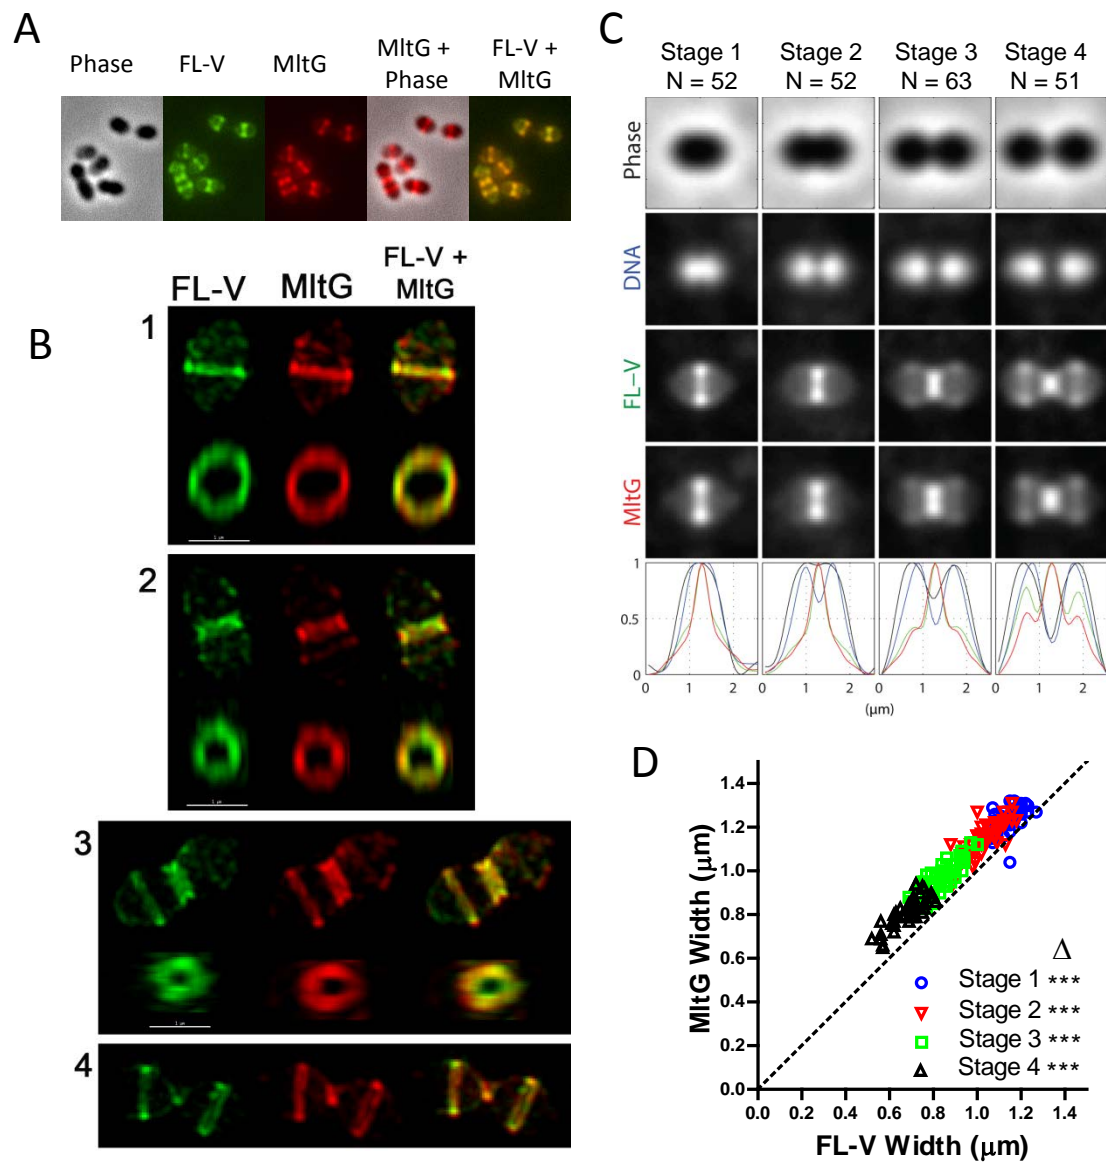

**Fig. S13**

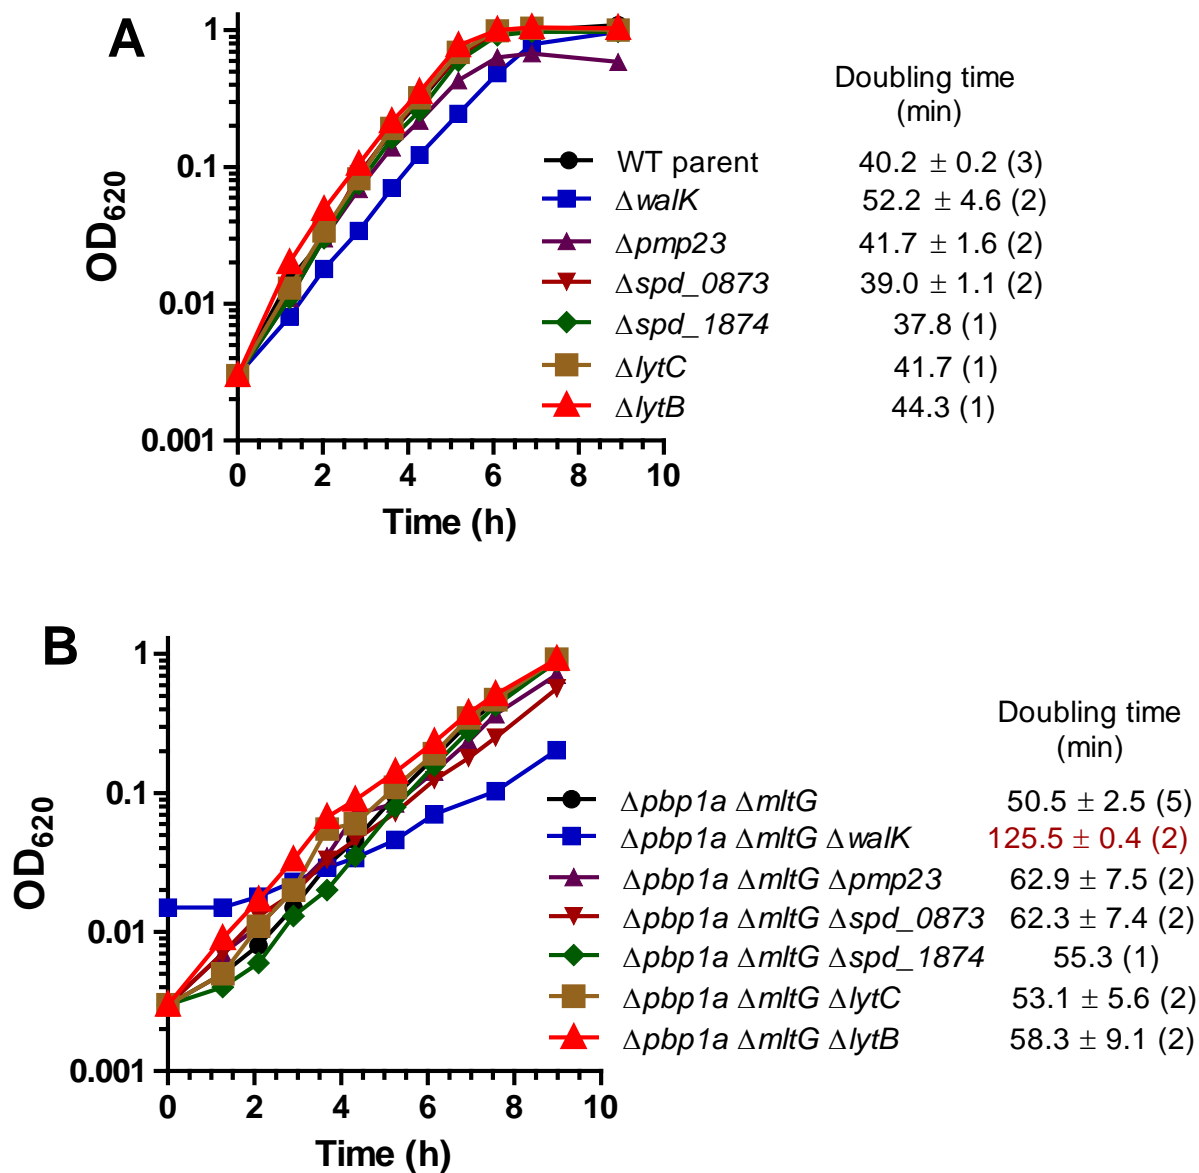

Fig. S14

**A** *spd\_1874*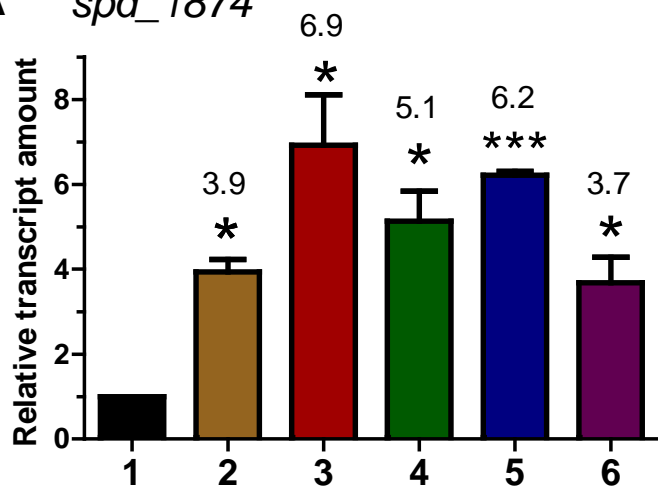**B** *spd\_0104*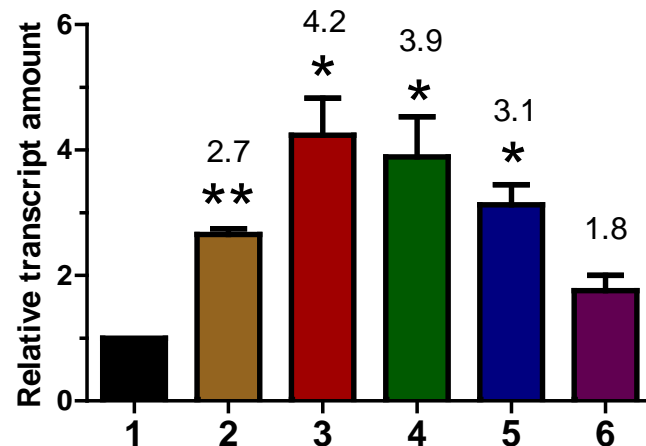**C***pcsB*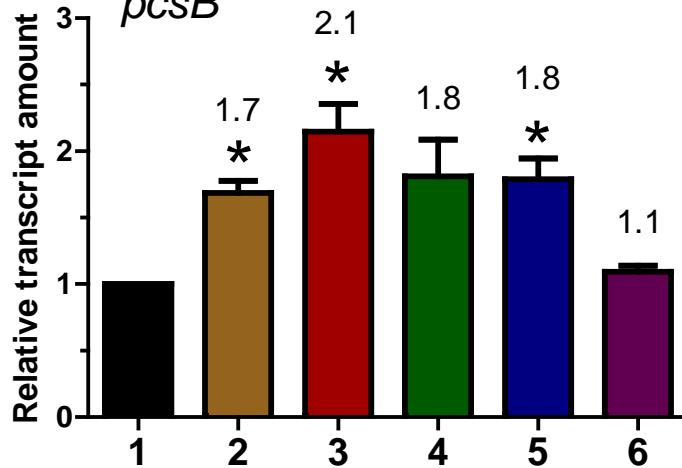

- 1 WT parent
- 2  $\Delta pbp1a$
- 3  $\Delta pbp1a mltG(\Delta 488bp)$
- 4  $\Delta pbp1a mltG(\Delta 488bp) \Delta pbp2b$
- 5 *mltG*(Y488D)
- 6 *mltG*(Y488D)  $\Delta pbp2b$

**Fig. S15**
